# Supplementary material
Source: Research Square preprint supplement (doi:10.21203/rs.3.rs-9835823/v1)
Supplement: Supplementary file 1 [file a13f97c7e42c7fd3ee72083d.docx]

**Questionnaire and Codebook: English Translation of the Administered Survey**

*Note: This document is an English translation of the questionnaire items and response options used in the survey. It contains no participant data or sensitive information.*

# Questionnaire Description and Administration Notes

- **Purpose:** This questionnaire was used to examine appearance anxiety, body-related self-perceptions, exercise self-efficacy, and exercise participation among college students.
- Target respondents: College students. The questionnaire was completed anonymously and voluntarily.
- **Administration platform:** The original questionnaire was administered through Wenjuanxing (Questionnaire Star). The full questionnaire items and response options are provided below; any survey link or QR code is for reference only and should not replace the questionnaire content.
- **Confidentiality:** The questionnaire file contains no names, student IDs, contact information, IP addresses, location information, or other directly identifiable personal information.
- **Informed consent:** Participants were informed of the study purpose, survey content, estimated completion time, potential risks, participant rights, anonymity and confidentiality measures, and data usage before completing the questionnaire.
- **Completion instruction:** Respondents were asked to choose the option that best reflected their actual situation or personal feelings. All items in the original questionnaire were required.
- **Response format:** Items 10–37 use a five-point Likert-type response scale. Items 38–40 assess exercise participation using five ordered response categories.
- **Scoring note:** Raw response coding is provided in this document. Any reverse coding or scale-score computation should follow the analytical protocol reported in the manuscript.

# Response Options for Five-Point Items

| **Code** | **English response option** |
| --- | --- |
| 1 | Completely/very inconsistent with me |
| 2 | Somewhat inconsistent with me |
| 3 | Neutral / average |
| 4 | Somewhat consistent with me |
| 5 | Very consistent with me |

# Part I.

| **Item** | **Suggested variable** | **English item** | **Response options / coding** |
| --- | --- | --- | --- |
| 1 | D1 | What is your gender? | 1 = Male; 2 = Female |
| 2 | D2 | What is the level of the university you attend? | 1 = “985/211” university; 2 = non-“985/211” university |
| 3 | D3 | What is your place of origin? | 1 = Urban area; 2 = Rural area |
| 4 | D4 | What is your academic year? | 1 = Freshman; 2 = Sophomore; 3 = Junior; 4 = Senior; 5 = Postgraduate or above |
| 5 | D5 | What is your major category? | 1 = Science and engineering; 2 = Literature, history, philosophy, and law; 3 = Economics and management; 4 = Medicine; 5 = Arts and sports; 6 = Other |
| 6 | D6 | Are you currently in a romantic relationship? | 1 = Yes; 2 = No |
| 7 | D7 | What is your monthly disposable income? | 1 = Below RMB 1,000; 2 = RMB 1,001–1,500; 3 = RMB 1,501–2,000; 4 = RMB 2,001–3,000; 5 = Above RMB 3,000 |
| 8 | D8 | What is your height (cm)? | Open-ended numeric response |
| 9 | D9 | What is your weight (kg)? | Open-ended numeric response |

# Part II.

Response options for Items 10–23: 1 = completely inconsistent with me; 2 = somewhat inconsistent with me; 3 = neutral/average; 4 = somewhat consistent with me; 5 = very consistent with me.

| **Item** | **Suggested variable** | **English item** |
| --- | --- | --- |
| 10 | AA1 | I feel nervous about certain aspects of my appearance. |
| 11 | AA2 | I worry about how others evaluate my appearance. |
| 12 | AA3 | I am satisfied with my appearance. |
| 13 | AA4 | I like the way I look. |
| 14 | AA5 | I want to change my appearance. |
| 15 | AA6 | I am satisfied with my body shape. |
| 16 | AA7 | I feel uncomfortable about certain aspects of my appearance. |
| 17 | AA8 | I think most of my friends are more attractive than I am. |
| 18 | AA9 | I wish I were better-looking. |
| 19 | AA10 | I worry about my ability to attract a romantic partner. |
| 20 | AA11 | I feel comfortable with my appearance. |
| 21 | AA12 | I am satisfied with my weight. |
| 22 | AA13 | I feel nervous when others comment on my appearance. |
| 23 | AA14 | I believe others consider me physically attractive. |

# Part III.

Response options for Items 24–28: 1 = completely/very inconsistent with me; 2 = somewhat inconsistent with me; 3 = neutral/average; 4 = somewhat consistent with me; 5 = very consistent with me.

| **Item** | **Suggested variable** | **English item** |
| --- | --- | --- |
| 24 | NBI1 | I am proud of my body. |
| 25 | NBI2 | I like my body very much. |
| 26 | NBI3 | Overall, I am satisfied with my body. |
| 27 | NBI4 | I have no regrets about my body. |
| 28 | NBI5 | There is nothing about my body that needs to be changed. |

# Part IV.

Response options for Items 29-37: 1 = completely inconsistent with me; 2 = somewhat inconsistent with me; 3 = neutral/average; 4 = somewhat consistent with me; 5 = very consistent with me.

| **Item** | **Suggested variable** | **English item** |
| --- | --- | --- |
| 29 | ESE1 | If the weather bothers me, I am still confident that I can exercise. |
| 30 | ESE2 | If I am not interested in the exercise, I am still confident that I can exercise. |
| 31 | ESE3 | If I feel pain during exercise, I am still confident that I can exercise. |
| 32 | ESE4 | If I have to exercise alone without a companion, I am still confident that I can exercise. |
| 33 | ESE5 | If I do not feel enjoyment from exercise, I am still confident that I can exercise. |
| 34 | ESE6 | If I am busy with other things, I am still confident that I can exercise. |
| 35 | ESE7 | If I feel tired, I am still confident that I can exercise. |
| 36 | ESE8 | Even when I feel stressed, I am confident that I can exercise. |
| 37 | ESE9 | Even when I feel depressed, I am confident that I can exercise. |

# Part V.

The following items assess the intensity, duration, and frequency of Exercise participation. Each item has five ordered response categories.

| **Item** | **Suggested variable** | **English item** | **Response options / coding** |
| --- | --- | --- | --- |
| 38 | EP1 | What is the intensity of the physical exercise you engage in? | 1 = Light exercise (e.g., walking, radio calisthenics, gateball, etc.); 2 = Low-intensity and less strenuous exercise (e.g., recreational volleyball, table tennis, jogging, tai chi, etc.); 3 = Moderate-intensity, relatively strenuous endurance exercise (e.g., cycling, running, table tennis, etc.); 4 = High-intensity but non-endurance exercise involving rapid breathing and heavy sweating (e.g., badminton, basketball, tennis, football, etc.); 5 = High-intensity endurance exercise involving rapid breathing and heavy sweating (e.g., race running, complete aerobics routines, swimming, etc.) |
| 39 | EP2 | When engaging in physical activity at the above intensity, how many minutes do you usually spend each time? | 1 = Within 10 minutes; 2 = 11–20 minutes; 3 = 21–30 minutes; 4 = 31–59 minutes; 5 = 60 minutes or more |
| 40 | EP3 | How many times per month do you engage in the above physical activity? | 1 = Less than once per month; 2 = 2–3 times per month; 3 = 1–2 times per week; 4 = 3–5 times per week; 5 = About once per day |

# Coding Summary

**Scoring and reverse coding note**

For all five-point Likert-type items, raw responses were coded from 1 to 5, with higher raw scores indicating stronger agreement with the item statement. For scale-score computation, reverse coding was applied where necessary to ensure that higher composite scores reflected higher levels of the intended construct.

For the Appearance Anxiety scale, higher scores indicate greater appearance anxiety. Positively worded appearance-evaluation items were reverse-coded before computing the scale score. The reverse-coded items were AA3, AA4, AA6, AA11, AA12, and AA14.

For the Negative Body Image scale, higher scores indicate a more negative body image. Because the listed body satisfaction items were positively worded, NBI1–NBI5 were reverse-coded before computing the negative body image score.

For the Exercise Self-efficacy scale, higher scores indicate greater exercise self-efficacy, and no items were reverse-coded.

For the Exercise Participation items, higher ordered categories indicate higher exercise participation intensity, duration, or frequency, and no items were reverse-coded.

Reverse coding for five-point items was performed as follows: reversed score = 6 − raw score.

| **Variable range** | **Description** | **Corresponding items** |
| --- | --- | --- |
| D1–D9 | Demographic and background variables | Items 1–9 |
| AA1–AA14 | Appearance anxiety items | Items 10–23; five-point response scale |
| NBI1–NBI5 | Negative Body Image items | Items 24-28; five-point response scale |
| ESE1–ESE9 | Exercise self-efficacy items | Items 29-37; five-point response scale |
| EP1–EP3 | Exercise participation items | Items 38-40; five ordered response categories |
