# Supplementary material
Source: Research Square preprint supplement (doi:10.21203/rs.3.rs-9835823/v1)
Supplement: Supplementary file 2 [file be6000063b646b059c4c029e.xlsx]

## Sheet: Sheet1
您的性别	您就读学校的层次	您的生源地	您所在的年级	您的专业类别	您的恋爱状况	您每月的可支配收入	您的身高（cm）	您的体重（kg）	R1	R2	R3	R4	R5	R6	R7	R8	R9	R10	R11	R12	R13	R14	F1	F2	F3	F4	F5	Y1	Y2	Y3	Y4	Y5	Y6	Y7	Y8	Y9	T1	T2	T3
1	1	1	5	2	2	3	157	65	2	2	1	1	3	1	1	1	1	2	2	1	3	1	1	2	2	1	2	5	4	3	4	4	4	4	5	5	4	5	4
2	1	2	4	1	1	4	181	70	2	3	2	3	2	2	1	1	2	1	2	2	2	1	1	2	2	1	2	4	4	4	3	4	5	5	5	5	5	5	4
2	2	1	2	4	1	3	163	51	4	3	4	4	4	4	4	5	4	4	4	5	3	3	5	5	4	2	5	3	3	1	1	1	1	1	2	2	2	1	2
2	2	1	1	5	2	2	157	46	2	1	3	2	1	3	1	1	1	2	1	1	3	1	5	5	4	3	4	3	4	4	4	5	4	4	5	3	4	5	4
1	2	1	3	4	1	3	159	49	2	2	1	2	2	1	2	2	1	3	2	1	2	1	2	2	2	2	3	4	3	1	3	3	1	3	1	3	5	5	4
1	2	1	2	1	1	4	158	49	1	2	3	2	3	3	3	2	1	1	3	2	1	1	2	1	2	3	1	3	5	4	5	5	4	5	4	4	5	3	4
2	2	1	3	2	2	3	170	67	2	2	2	3	1	3	1	2	2	1	1	2	2	2	2	2	1	2	3	5	5	5	5	5	5	3	4	5	4	4	4
1	1	1	4	1	2	5	173	61	3	2	1	2	2	1	1	1	1	3	1	1	2	1	1	2	1	2	3	3	5	3	5	3	4	4	4	4	5	4	3
2	2	2	3	4	2	1	163	50	2	1	2	3	1	1	2	1	1	2	1	2	2	1	2	2	2	1	3	5	3	3	3	5	4	4	4	4	4	4	5
2	2	2	5	4	1	3	157	70	2	1	3	1	2	3	1	2	2	2	2	3	2	1	3	1	1	1	1	4	3	5	4	4	4	4	4	5	4	3	4
2	2	1	2	3	2	4	167	61	1	3	3	1	3	2	2	1	1	2	1	3	2	1	2	1	3	2	3	3	1	2	2	2	2	1	1	2	1	1	1
2	2	2	2	4	2	2	164	65	2	2	1	1	3	1	1	1	1	2	2	1	3	1	1	3	2	2	2	4	5	5	4	4	3	4	5	3	4	5	5
2	1	2	5	4	1	4	179	73	3	3	1	1	2	3	3	1	2	2	2	3	1	1	1	1	2	3	1	4	5	5	5	4	5	4	5	4	1	1	1
1	1	1	5	2	2	2	166	48	5	5	5	4	3	4	3	4	3	4	4	3	5	5	4	5	3	4	5	2	2	1	1	1	3	3	1	2	2	2	3
2	1	1	4	2	2	3	175	71	2	1	2	1	2	2	1	1	3	1	1	2	3	2	3	3	2	2	1	1	1	1	2	1	2	3	3	1	4	4	4
2	1	2	2	2	2	2	179	74	3	2	1	3	2	2	1	3	2	2	2	3	3	1	2	2	3	1	2	4	3	4	5	4	4	3	4	4	4	5	5
1	2	1	4	3	2	3	171	57	2	1	3	2	2	2	2	2	1	2	2	3	2	2	2	3	2	2	3	4	4	5	5	4	4	5	3	5	5	5	5
1	2	1	4	5	2	2	158	73	2	1	3	1	3	2	1	1	1	1	2	2	2	2	1	1	3	1	1	5	4	5	4	5	5	5	5	5	3	4	3
1	2	2	5	3	1	2	159	49	1	3	2	2	1	1	2	2	1	3	1	3	2	1	2	2	3	3	2	4	5	5	3	4	4	4	4	3	4	4	4
2	2	2	2	3	2	3	181	61	2	2	2	1	1	1	2	1	2	2	2	1	2	1	1	3	3	1	2	5	5	4	4	4	4	4	4	5	4	5	4
1	2	2	5	4	2	2	159	75	3	3	4	5	3	5	5	3	4	3	4	3	4	5	2	1	3	2	2	5	3	4	5	4	4	4	4	3	5	5	4
2	2	2	1	3	2	1	172	55	5	5	5	3	4	3	3	2	3	3	3	5	3	4	3	3	3	4	4	1	2	1	2	3	3	3	3	1	3	1	2
1	1	1	1	2	2	5	177	71	2	2	3	1	3	1	3	2	3	1	2	2	1	3	2	2	3	1	1	3	4	4	3	4	5	5	5	4	4	4	5
2	2	1	2	2	2	3	172	67	2	3	3	2	2	2	2	2	2	3	3	3	3	1	5	4	3	4	5	5	4	4	4	4	4	4	4	3	4	5	5
1	2	1	4	5	2	3	170	53	2	2	1	1	1	2	1	3	1	2	1	2	2	2	2	2	2	3	3	5	4	4	4	5	4	4	4	4	5	5	4
1	2	1	2	4	2	2	173	49	2	1	2	1	3	2	3	3	1	1	3	2	1	2	3	2	2	2	1	4	5	4	3	3	5	3	5	5	5	4	4
1	1	2	3	3	1	3	178	62	3	3	3	3	3	5	3	5	5	3	4	5	4	4	5	4	3	3	3	5	3	4	4	5	5	4	5	5	4	5	5
1	2	2	5	2	2	2	161	62	5	2	4	5	3	4	5	4	5	4	4	3	3	2	2	2	2	1	2	3	4	1	1	3	2	3	4	2	3	1	1
2	1	1	2	1	2	5	158	53	2	2	1	2	2	2	2	1	2	1	1	1	2	3	2	2	2	2	3	4	4	5	3	4	5	4	5	5	5	4	4
2	2	2	5	4	2	4	164	56	2	1	2	2	3	2	2	1	1	3	2	1	2	1	2	3	2	2	1	3	3	2	1	1	1	1	1	1	4	4	4
2	1	1	4	1	2	3	165	49	2	3	2	2	1	3	2	1	1	1	1	1	1	2	2	2	2	2	3	4	3	4	3	5	4	3	4	3	3	3	5
2	1	2	5	2	1	1	167	59	4	4	3	5	5	5	5	3	5	4	5	4	4	4	5	3	5	4	3	4	4	4	4	5	4	4	4	4	3	3	3
2	2	1	2	2	2	2	169	56	1	1	2	3	2	2	2	2	2	2	2	2	2	1	2	1	3	2	1	5	3	4	5	5	4	4	4	4	2	2	1
2	2	1	4	6	1	3	158	70	2	1	3	1	2	2	2	1	2	1	2	1	2	1	1	2	2	2	1	3	4	3	5	5	3	4	5	4	4	3	3
1	2	2	5	3	1	2	181	64	2	2	2	3	1	2	2	3	3	2	2	2	2	2	2	2	1	2	3	1	3	2	1	2	1	2	3	2	5	4	5
2	2	1	1	5	2	4	163	69	2	1	3	2	1	3	1	1	1	2	1	1	3	1	2	2	1	3	1	5	3	4	4	4	5	5	3	3	4	4	5
1	2	2	1	1	2	2	157	75	3	2	1	2	1	1	2	3	2	2	1	1	2	1	2	3	2	2	2	3	2	2	1	2	2	2	1	1	5	5	4
2	2	1	1	3	2	3	164	64	2	1	2	1	3	2	3	3	1	1	3	2	1	2	1	1	2	1	2	4	5	5	5	3	5	4	4	5	4	4	4
1	1	1	2	2	2	1	163	67	5	5	5	4	4	2	4	5	4	4	3	3	3	5	1	3	2	2	1	4	3	4	5	4	4	3	4	4	5	5	4
2	2	1	1	3	1	1	171	71	2	2	2	1	1	3	1	1	2	1	2	1	3	2	3	2	2	2	3	5	5	5	5	5	5	3	4	5	2	2	1
1	2	2	5	2	2	3	160	64	2	2	2	1	3	3	1	1	2	2	1	1	2	3	2	3	1	3	2	3	5	4	5	5	4	5	4	4	4	4	4
1	1	1	3	2	1	3	160	57	1	1	2	1	3	2	2	1	1	3	1	2	2	1	2	1	2	2	3	4	4	4	5	3	4	4	4	5	4	3	4
1	1	2	4	3	2	3	175	49	2	2	2	3	1	3	1	2	2	1	1	2	2	2	1	2	2	2	1	5	3	5	4	4	4	3	4	5	5	4	5
2	2	1	4	1	1	3	163	59	2	2	1	3	1	1	3	3	1	1	1	1	1	2	1	3	2	2	3	4	4	3	4	5	4	5	5	4	4	5	5
2	2	2	4	1	1	2	173	75	1	2	1	1	2	3	3	2	1	2	2	1	3	2	2	2	2	2	3	4	4	3	5	4	5	5	4	4	3	4	3
1	2	1	4	1	2	2	173	51	5	2	5	3	3	5	4	5	4	5	3	4	5	3	5	4	3	3	4	5	4	4	5	4	4	5	3	5	1	1	1
2	1	1	2	2	2	2	159	73	4	4	5	2	2	5	3	5	3	5	5	5	5	4	5	5	5	3	5	2	2	3	1	1	2	2	1	3	3	2	3
2	2	2	1	2	1	2	169	66	5	5	5	3	4	5	4	3	3	5	3	3	5	3	3	3	3	4	5	1	1	2	1	2	1	2	2	1	1	1	1
1	2	1	2	1	2	3	175	72	2	3	1	2	3	1	1	2	1	2	2	1	3	3	2	2	2	1	1	5	4	4	4	4	4	4	4	3	4	4	4
1	2	1	2	2	2	3	173	61	2	2	2	3	2	3	2	3	1	2	3	2	2	1	2	1	2	3	1	4	5	4	4	4	4	4	4	4	4	5	5
2	1	2	4	2	1	2	161	59	5	5	5	4	3	3	4	2	5	5	3	3	2	5	3	3	3	4	5	2	1	1	3	1	2	3	2	3	1	2	1
1	2	2	5	1	2	3	159	61	3	4	3	3	2	3	5	4	5	5	4	4	4	5	5	3	3	5	3	3	4	3	2	2	2	1	3	3	2	2	2
1	1	2	2	3	1	3	169	51	1	3	2	3	1	3	3	2	1	2	2	2	2	2	1	1	2	1	2	4	5	4	5	5	5	3	4	5	4	4	4
1	2	2	2	4	1	1	172	61	3	4	3	3	4	4	4	4	2	5	5	3	4	3	3	1	1	2	3	3	5	5	3	4	3	5	3	4	4	3	3
1	1	1	1	6	2	3	159	59	2	2	3	2	2	1	2	1	2	2	1	1	1	2	3	1	2	2	2	4	4	4	5	5	3	5	4	5	4	5	5
2	2	1	4	1	1	5	158	64	2	1	3	1	3	2	1	1	1	1	2	2	2	2	2	3	1	2	1	5	4	4	4	4	3	4	4	4	3	4	4
2	2	2	3	1	2	1	178	63	1	1	2	1	1	1	1	2	2	1	2	3	3	2	2	2	2	3	3	3	4	4	3	4	4	4	5	3	4	5	5
2	1	2	5	2	1	3	179	71	5	5	5	3	4	5	4	3	3	5	3	3	5	3	3	5	4	4	5	2	1	1	4	1	2	3	1	2	1	2	1
2	2	2	5	3	2	2	180	74	2	2	2	3	2	2	1	2	2	1	1	3	2	2	2	1	2	1	1	4	5	5	4	4	3	4	5	3	4	3	4
1	2	2	1	2	2	1	161	47	3	2	1	2	3	2	3	3	1	2	1	2	2	1	2	1	2	2	3	4	3	5	3	4	5	5	5	5	4	4	3
1	1	1	4	1	2	3	181	67	2	1	1	2	1	2	1	2	1	2	1	2	2	2	3	2	2	2	1	3	5	4	4	4	5	5	3	5	4	3	4
1	1	1	4	2	1	3	168	63	2	2	2	1	2	3	3	1	1	3	2	2	1	2	2	1	1	3	2	5	5	3	3	5	4	4	5	5	4	5	4
1	2	1	5	1	1	3	176	61	2	2	2	1	3	1	1	2	2	1	1	2	2	2	2	2	1	1	2	4	5	4	5	5	4	5	5	5	5	4	4
2	1	2	3	1	2	2	179	70	3	3	5	3	3	4	3	5	3	5	5	5	5	4	4	3	4	5	5	1	1	3	2	2	2	4	3	2	4	5	5
1	1	1	1	2	2	1	160	62	2	2	2	2	1	2	2	1	1	2	2	2	1	1	2	1	2	2	2	4	5	5	5	5	5	5	4	4	3	4	4
2	2	1	2	1	1	3	180	68	1	1	3	1	3	2	1	3	2	2	2	3	3	1	1	3	1	3	1	5	5	5	4	4	4	4	5	3	4	5	4
2	2	2	5	1	1	3	162	64	2	2	2	2	2	2	2	2	1	2	2	2	1	1	3	1	2	2	2	5	4	5	3	5	5	3	3	5	3	2	2
1	2	2	1	3	2	2	176	68	2	3	2	5	3	3	5	5	5	5	5	4	2	4	3	2	2	2	2	4	4	4	4	3	5	3	4	3	4	4	5
1	2	2	5	5	1	2	163	70	1	2	1	3	2	1	3	2	1	2	1	2	2	1	3	2	2	1	2	5	4	5	4	4	4	4	4	3	4	5	5
2	2	2	3	4	1	2	159	52	2	1	2	2	3	2	2	2	2	2	2	3	2	2	3	1	2	2	1	4	5	4	5	4	5	4	4	4	4	5	5
1	2	2	3	3	2	1	167	50	2	1	2	2	3	2	2	1	1	3	2	1	2	1	2	2	1	1	1	5	4	3	4	3	3	3	4	4	3	4	3
2	1	1	1	2	2	3	165	76	2	3	2	5	3	3	5	5	5	5	5	4	2	4	3	2	2	2	2	4	5	4	4	4	4	5	3	5	3	4	4
2	1	1	2	4	2	2	169	51	3	1	1	3	1	3	3	2	1	2	2	3	3	1	1	2	3	2	2	5	4	4	4	4	3	5	5	5	2	1	2
2	1	1	2	2	2	3	165	67	1	1	2	3	3	1	1	2	2	2	1	1	2	2	3	2	1	2	2	5	4	5	3	4	4	5	5	5	1	2	2
1	2	1	4	3	1	3	163	68	2	3	2	1	2	1	2	2	3	2	3	2	2	2	2	2	2	2	3	5	5	4	4	3	5	4	4	5	5	5	4
1	2	1	4	1	2	4	166	55	3	3	2	1	2	2	1	1	2	2	2	1	1	1	4	2	5	4	4	5	3	4	3	5	5	3	3	5	2	2	3
1	2	2	1	2	2	4	181	63	2	1	2	2	2	1	3	3	2	2	2	1	2	2	3	3	3	2	1	3	5	3	4	4	4	3	5	3	4	5	4
2	2	2	1	2	1	2	177	58	1	2	1	3	2	1	1	2	2	1	2	2	2	3	2	2	3	1	2	3	3	1	3	3	3	2	1	1	4	5	4
1	2	1	4	6	2	3	182	53	1	2	3	2	3	3	3	2	1	1	3	2	1	1	1	2	1	1	3	3	3	5	3	5	3	4	5	4	5	4	4
1	2	1	3	1	1	4	171	54	2	2	1	2	3	1	2	1	2	1	2	2	1	2	1	2	3	2	2	5	5	4	5	4	5	4	4	5	1	1	2
1	1	1	4	1	1	1	165	74	2	1	2	2	3	1	3	1	3	1	2	2	1	3	2	2	2	1	2	4	5	4	5	3	4	5	5	4	3	5	3
1	2	2	1	4	2	2	161	46	3	2	1	3	2	2	1	3	2	2	2	3	3	1	3	2	2	2	2	4	4	4	4	5	4	5	4	5	5	3	4
2	2	1	3	1	2	3	164	51	3	3	1	1	2	3	3	1	2	2	2	3	1	1	3	1	2	2	2	4	3	4	3	4	4	3	4	3	3	4	5
1	2	1	5	3	2	2	180	63	2	2	3	3	2	2	1	3	2	2	2	1	3	3	2	1	1	1	1	4	4	5	5	5	4	4	3	4	4	3	3
2	1	1	4	1	2	3	162	68	3	2	1	2	1	3	1	2	2	2	2	3	2	2	2	3	2	2	2	3	4	3	4	4	4	3	5	4	3	4	5
2	2	2	3	1	2	3	166	67	2	2	2	1	3	3	2	2	2	2	1	3	1	2	1	3	3	1	2	4	4	5	5	4	5	4	4	5	4	3	4
1	2	2	4	6	2	2	169	69	4	3	3	5	3	5	5	4	4	5	4	3	5	4	2	3	1	2	1	4	4	4	5	5	4	5	5	4	4	3	3
2	1	2	5	1	2	1	172	63	2	3	1	2	1	2	1	3	2	2	2	2	1	3	2	2	2	3	3	5	4	5	4	5	5	5	5	5	5	5	3
2	2	2	5	5	2	4	168	49	1	1	1	2	2	1	2	2	2	2	2	1	1	1	2	2	2	1	2	4	4	3	3	5	4	3	4	4	5	4	4
1	1	2	5	2	2	2	175	57	3	1	2	1	3	1	3	3	3	2	2	3	3	2	2	2	2	3	3	3	5	5	4	4	4	4	5	4	4	4	4
1	1	1	1	3	2	3	173	61	2	2	1	3	3	2	2	2	1	2	2	2	1	2	3	3	3	2	1	5	5	4	4	4	4	4	4	4	3	5	3
2	2	2	5	3	2	2	172	56	2	1	2	1	3	1	1	1	3	1	3	1	2	3	1	1	3	1	1	4	3	3	4	5	3	4	3	5	4	3	5
1	2	2	4	2	1	1	179	74	2	1	1	2	2	2	2	2	2	3	3	1	1	3	3	3	5	4	4	5	4	4	4	5	5	4	5	4	5	4	5
2	1	1	1	2	2	3	157	61	2	1	1	1	2	2	3	1	2	1	2	2	2	1	2	2	1	2	3	4	4	4	4	4	5	4	4	3	5	4	5
1	1	2	5	3	1	3	175	53	4	5	4	3	5	4	3	3	5	3	5	3	4	3	4	4	4	4	4	5	3	5	3	3	4	4	5	4	4	4	3
1	2	1	1	3	2	4	164	55	2	3	1	2	3	1	1	2	1	2	2	1	3	3	1	3	3	1	2	4	5	4	5	3	4	5	5	4	3	5	5
2	2	2	4	1	2	3	160	71	3	2	1	2	3	2	3	3	1	2	1	2	2	1	1	2	3	2	2	5	3	4	4	5	4	4	5	3	4	3	5
1	1	1	4	2	2	3	182	76	1	1	3	2	1	2	1	3	1	3	1	1	2	2	2	1	1	3	2	3	4	5	4	5	5	5	3	4	4	5	4
1	1	1	2	3	1	3	159	49	4	3	4	4	4	4	4	5	4	4	4	5	3	3	1	1	2	2	2	5	5	5	3	3	5	5	3	4	5	4	4
2	2	2	4	4	2	4	170	75	3	2	3	1	2	2	2	1	2	1	1	1	3	3	1	3	1	2	2	3	4	5	4	5	4	5	5	4	4	4	4
2	1	2	2	3	2	1	176	53	5	5	3	5	5	4	4	3	4	4	3	3	5	3	2	3	5	4	4	2	4	2	2	2	3	1	3	4	2	2	1
2	2	1	1	2	2	3	168	74	1	2	1	3	2	2	1	2	2	1	1	1	1	2	2	2	1	1	1	3	4	4	4	4	5	4	3	5	4	5	4
2	1	1	5	3	1	1	172	75	3	1	3	2	2	1	2	1	3	3	3	2	2	2	1	1	1	2	2	3	4	5	4	5	4	4	5	5	4	4	4
1	2	2	4	1	2	2	158	62	2	2	2	2	3	2	2	2	2	3	1	2	2	2	2	2	1	1	2	5	4	4	5	4	5	5	4	4	5	5	4
2	1	2	1	1	2	4	168	73	5	4	4	5	5	5	3	5	3	5	3	5	5	2	4	4	3	5	3	3	3	2	1	3	3	2	3	2	3	2	3
1	2	2	1	3	1	2	157	46	2	1	2	2	2	1	1	2	2	2	2	2	2	2	2	1	1	2	2	5	4	3	4	4	4	4	5	5	4	4	4
2	1	2	2	3	2	1	168	50	1	1	3	2	2	1	2	2	2	2	1	2	2	1	5	3	3	5	4	1	3	1	3	3	3	1	1	1	4	3	3
1	1	1	4	4	1	1	175	50	5	4	4	3	5	3	5	2	3	4	4	4	3	4	4	4	3	4	5	3	4	3	5	5	3	4	5	4	3	1	1
2	2	1	4	1	1	4	176	49	5	4	5	3	3	5	5	2	4	4	3	5	5	3	5	4	5	5	4	3	4	2	2	3	2	1	2	1	2	3	1
2	2	1	3	6	2	1	163	57	1	1	2	1	1	2	1	2	1	1	2	2	2	2	1	2	1	1	3	5	4	5	4	3	3	4	4	5	5	3	4
2	2	1	3	2	2	1	167	63	2	1	1	1	2	1	2	2	2	3	3	2	2	1	2	1	1	2	3	3	3	2	3	3	4	3	2	1	5	4	4
2	2	2	5	2	1	5	173	66	2	2	1	3	1	1	3	3	1	1	1	1	1	2	1	1	2	2	2	3	5	3	4	3	4	5	5	3	4	3	4
1	2	2	5	3	2	2	167	54	3	3	2	1	2	2	1	1	2	2	2	1	1	1	2	2	2	1	1	5	4	3	3	5	5	4	5	5	5	5	4
2	2	2	3	6	2	3	167	59	3	2	2	2	2	1	2	1	1	2	2	2	3	2	3	4	4	5	3	4	5	4	3	3	3	4	3	4	4	3	5
2	2	2	1	4	2	2	160	76	5	4	4	3	5	3	5	2	3	4	4	4	3	4	4	4	3	5	5	4	4	3	5	4	5	4	5	4	2	1	2
1	2	2	2	1	2	5	177	69	3	5	4	3	3	3	4	4	4	3	4	3	3	4	4	2	5	4	4	3	4	5	4	5	5	5	3	4	4	4	4
1	2	1	4	1	2	3	162	60	5	4	4	3	4	3	3	4	4	3	3	5	3	4	2	1	2	2	1	5	4	3	5	5	5	4	3	4	4	4	5
2	2	2	3	3	2	3	174	56	1	2	2	2	1	2	2	3	1	1	2	1	1	1	1	3	2	2	2	1	1	3	1	4	3	3	2	3	3	3	3
1	1	1	3	3	2	3	179	75	3	5	5	5	5	3	4	3	4	5	5	3	3	5	3	3	1	1	1	5	4	4	4	4	4	4	3	4	4	2	3
1	2	2	5	2	2	3	167	61	4	5	4	5	5	4	5	3	3	3	5	5	3	4	4	3	5	5	2	4	4	4	4	3	3	4	5	4	2	1	2
1	2	2	4	4	1	3	172	67	1	1	1	1	2	2	1	3	2	2	1	2	1	1	1	1	1	1	3	3	5	3	5	3	4	4	4	4	5	5	4
1	2	1	4	5	1	3	174	67	1	1	3	2	1	1	3	3	1	1	2	2	2	3	1	3	2	2	2	4	5	4	4	5	5	4	5	3	5	4	4
1	2	2	3	3	2	3	167	66	4	4	5	5	5	4	5	3	3	3	5	4	5	2	1	1	1	2	1	1	3	2	1	3	4	1	3	2	1	2	3
1	1	2	4	3	1	3	182	67	2	1	2	2	2	2	2	1	1	2	3	2	2	1	2	1	3	2	2	4	3	3	4	5	3	4	3	5	4	4	4
2	1	1	1	1	1	5	172	68	3	2	2	2	2	1	2	1	1	2	2	2	3	2	1	2	3	2	2	4	5	4	5	3	3	3	5	5	1	3	1
1	2	2	4	4	2	1	167	62	1	2	1	3	2	1	3	2	1	2	1	2	2	1	1	2	1	1	3	5	4	3	5	4	5	5	5	5	5	4	4
2	2	1	5	1	2	2	177	56	5	3	4	3	2	3	3	3	5	3	5	4	3	3	5	4	4	4	5	3	3	1	3	3	3	2	1	1	3	1	3
2	2	1	3	3	2	3	166	56	2	3	2	1	2	3	3	2	2	1	3	1	2	2	2	2	1	1	3	3	5	4	3	4	4	4	4	3	4	4	4
1	2	1	1	2	2	4	169	54	4	5	4	4	5	4	4	3	3	4	3	4	5	4	2	1	2	1	1	3	3	1	4	3	4	2	3	3	5	4	5
1	1	1	1	3	1	3	165	54	2	3	1	2	2	1	2	2	3	3	1	2	2	3	2	2	2	1	1	4	5	5	5	4	5	4	5	4	5	5	5
2	1	1	2	5	1	4	162	53	4	3	3	5	3	5	5	4	4	5	4	3	5	4	5	4	3	3	5	3	2	1	1	1	2	2	2	3	1	1	2
2	2	2	2	3	2	3	179	47	3	2	1	1	1	1	3	2	1	3	2	3	2	2	3	1	3	3	3	3	5	4	5	5	4	5	4	4	4	4	5
2	2	1	4	1	2	2	162	52	2	2	3	1	3	1	3	2	3	1	2	2	1	3	1	1	2	1	2	5	3	5	4	4	4	3	4	5	4	4	5
1	1	1	1	2	1	2	174	59	2	1	2	3	1	1	2	1	1	2	1	2	2	1	3	2	1	2	1	1	1	2	3	3	3	3	3	3	3	5	3
1	2	2	3	2	2	2	163	62	5	3	5	3	4	3	5	4	3	4	3	5	4	5	2	2	2	2	3	3	4	2	1	1	3	2	1	2	3	1	4
2	1	1	3	3	2	3	176	65	3	2	2	1	1	2	3	2	2	3	3	2	1	2	3	3	2	2	2	3	3	5	4	5	4	4	4	4	3	4	3
2	1	1	2	2	1	5	178	69	2	2	1	1	2	3	1	2	2	1	2	2	2	2	2	1	2	2	3	3	3	4	5	4	4	5	3	5	3	4	5
1	1	2	5	5	2	3	162	75	2	3	2	3	2	2	1	1	2	1	2	2	2	1	3	1	2	2	3	3	4	4	5	3	5	3	4	3	5	4	5
2	1	2	4	4	2	3	161	72	5	5	5	3	4	3	3	2	3	3	3	5	3	4	5	3	5	3	5	2	1	1	1	2	1	2	1	2	3	1	1
1	2	1	4	1	1	3	169	74	3	2	3	1	2	2	2	1	2	1	1	1	3	3	3	2	1	2	2	4	3	5	3	4	5	5	5	5	4	5	3
2	2	2	2	1	2	1	182	68	5	5	4	3	5	4	3	3	3	5	3	3	2	3	3	5	5	3	4	2	3	1	2	4	1	3	1	3	2	3	1
2	2	1	4	1	1	3	175	46	1	2	1	1	2	3	3	2	1	2	2	1	3	2	2	1	1	2	2	4	5	4	4	4	4	4	4	4	5	5	5
1	2	2	2	3	1	1	165	65	4	5	3	5	3	4	4	4	3	4	5	4	5	4	1	2	2	1	3	5	4	4	5	4	4	5	5	5	2	2	3
2	2	2	3	3	2	3	171	56	5	5	3	5	5	3	4	4	4	4	2	2	4	5	5	5	4	5	4	5	4	5	4	3	4	5	3	4	4	5	5
1	2	2	4	5	2	3	174	55	4	3	5	4	3	2	4	3	3	3	3	5	4	5	3	2	1	2	3	4	5	4	3	5	4	5	4	5	4	4	3
2	2	1	2	1	1	3	172	76	3	5	4	3	3	3	4	4	4	3	4	3	3	4	3	3	2	2	2	5	3	4	3	5	5	3	3	5	4	4	5
1	2	2	4	3	2	2	179	71	4	5	4	4	5	4	4	3	3	4	3	4	5	4	3	5	4	3	5	1	1	3	2	1	1	3	1	3	3	1	3
2	2	1	2	1	1	2	173	54	5	5	5	4	3	3	4	2	5	5	3	3	2	5	2	4	5	2	4	3	2	2	3	4	2	2	3	1	4	4	5
2	1	2	4	3	1	2	180	67	3	2	2	3	1	2	1	2	2	2	2	3	2	1	1	1	2	2	3	4	3	5	5	4	4	4	3	4	5	4	3
2	1	2	2	1	2	3	162	63	3	2	2	3	1	3	2	1	2	2	2	3	2	3	3	1	2	2	2	2	1	2	2	3	3	1	1	1	4	3	5
1	2	1	3	2	1	1	169	60	5	4	5	3	5	5	4	3	3	3	4	5	5	5	4	4	3	4	5	1	1	3	3	1	2	3	2	1	2	2	1
1	1	2	1	4	1	2	160	75	5	2	5	4	4	5	4	3	3	3	5	4	4	3	1	2	2	2	1	4	3	5	4	5	4	3	5	3	1	2	3
2	2	1	1	3	1	3	169	71	1	3	2	3	2	2	2	2	2	1	1	1	2	2	1	2	1	1	2	4	5	4	5	5	4	5	5	5	4	5	4
1	2	2	2	4	1	4	159	76	2	2	2	3	1	1	2	2	2	2	2	1	2	1	3	3	1	1	1	4	4	4	5	5	3	5	4	5	5	3	4
2	2	1	1	1	1	4	173	58	2	3	2	5	4	5	3	3	4	5	3	3	5	3	1	3	3	3	2	5	4	4	4	4	3	4	4	4	5	5	4
2	1	2	4	5	1	5	168	67	1	3	1	1	2	1	1	1	1	3	2	2	1	2	3	2	1	1	1	4	4	4	5	5	5	5	4	4	4	5	3
2	1	1	2	1	2	4	157	56	2	1	3	1	2	1	2	1	1	1	2	2	1	3	2	2	3	1	2	1	3	1	1	1	1	1	3	2	4	5	5
1	1	2	1	4	2	4	169	51	2	1	1	2	2	1	2	1	2	3	1	3	3	2	1	2	2	2	1	3	4	4	4	4	5	4	3	5	3	4	4
2	2	1	3	1	1	4	175	68	2	2	2	3	2	2	1	3	1	1	2	2	2	2	1	3	1	3	1	4	5	3	4	5	5	3	4	4	5	3	4
2	2	2	3	3	2	3	176	51	2	1	1	1	2	1	2	2	1	3	3	1	1	2	1	1	2	2	3	4	5	3	5	5	4	4	5	4	3	5	3
2	2	1	5	3	2	1	160	59	2	2	2	3	2	2	1	2	2	1	1	3	2	2	3	2	1	2	3	3	1	1	1	2	4	1	2	1	3	4	4
1	2	1	2	3	2	1	159	46	1	2	1	2	2	3	2	2	1	3	2	1	1	3	5	5	3	2	5	3	3	3	2	2	2	3	2	3	1	1	1
1	1	1	4	5	1	1	172	64	5	4	4	2	3	4	4	4	4	4	4	5	5	3	3	5	4	3	4	2	1	1	1	1	4	2	2	3	2	2	3
1	1	2	4	1	1	2	168	62	3	2	2	3	1	3	2	1	2	2	2	3	2	3	3	2	2	3	2	3	4	4	4	4	4	5	5	5	4	3	5
1	1	1	5	4	2	3	182	67	1	1	2	3	3	3	2	2	2	1	2	1	1	3	3	2	3	2	2	3	4	5	5	3	4	3	5	4	4	3	4
1	2	1	2	2	2	1	164	62	2	1	1	2	2	1	2	3	3	1	2	1	2	1	1	2	3	3	1	4	5	3	5	5	4	3	5	4	5	5	4
1	2	1	5	4	2	2	165	54	1	1	1	2	1	2	1	3	3	1	1	3	2	3	2	1	2	2	1	1	1	1	2	1	1	3	1	1	4	4	4
1	2	2	4	4	2	2	166	70	1	3	1	1	2	2	1	2	2	2	2	2	2	1	2	2	2	3	1	4	4	5	5	4	4	5	4	5	3	3	2
1	2	2	2	2	1	2	173	66	2	1	2	1	1	1	1	2	1	2	2	2	2	1	1	2	3	2	2	4	3	5	5	4	4	4	3	4	5	4	5
1	2	2	5	1	1	2	179	57	2	3	1	2	1	2	1	3	2	2	2	2	1	3	1	2	2	2	2	5	4	4	4	4	3	5	5	5	4	4	4
1	1	1	5	2	1	3	164	49	2	1	1	2	2	1	2	1	2	3	1	3	3	2	2	2	2	3	1	4	3	5	5	5	5	4	4	4	1	3	1
1	1	1	4	2	1	3	171	55	2	1	1	3	3	3	3	1	3	1	3	1	2	2	5	3	5	3	4	3	3	1	2	3	1	3	3	3	2	1	3
1	2	1	2	1	1	3	165	51	2	1	3	1	2	1	2	1	1	1	2	2	1	3	3	2	1	2	2	5	4	3	4	4	4	4	5	5	4	4	4
2	2	2	3	5	1	3	160	64	2	2	1	3	1	2	2	1	1	2	1	3	2	1	2	2	3	2	2	5	4	5	5	5	4	5	3	5	4	5	4
1	1	1	2	3	2	2	160	73	2	1	3	1	2	1	2	3	2	2	2	2	1	2	3	1	2	2	2	5	4	3	5	5	3	5	3	4	4	5	5
1	1	2	4	2	2	1	168	46	2	2	2	3	2	2	1	2	2	1	1	3	2	2	2	3	2	2	3	5	5	5	5	4	4	5	3	5	5	5	5
2	1	1	4	1	2	3	160	60	1	3	1	2	3	2	3	2	3	1	1	3	2	1	3	2	1	2	1	4	5	5	4	4	3	4	5	3	5	5	3
1	2	1	2	1	1	2	171	49	3	2	2	2	1	2	2	1	2	2	2	1	2	1	3	2	1	2	2	4	3	4	4	5	5	4	3	5	5	3	4
1	2	1	3	2	1	4	160	56	2	1	2	2	2	1	3	3	2	2	2	1	2	2	4	2	3	5	4	3	1	1	1	1	3	2	1	3	1	1	1
2	2	2	3	1	2	2	159	57	2	1	1	2	2	3	1	2	2	1	2	2	3	1	2	2	2	3	1	3	4	4	3	5	3	4	5	4	4	4	4
2	1	2	2	3	2	3	162	56	2	1	1	2	2	1	2	3	3	1	2	1	2	1	1	2	1	2	3	4	5	3	4	5	5	3	4	4	4	4	4
1	2	1	5	5	2	3	166	63	3	2	2	2	2	1	1	3	2	1	2	1	3	1	2	2	1	3	1	3	4	4	3	4	5	3	5	5	4	4	3
2	1	1	1	1	2	5	170	66	2	3	2	2	1	3	2	1	1	1	1	1	1	2	1	1	1	2	2	4	5	4	5	4	3	4	3	4	4	5	4
1	2	1	1	3	1	3	168	49	2	2	2	3	2	2	1	2	2	1	1	3	2	2	2	2	3	3	2	4	5	5	3	4	4	4	4	3	2	2	3
2	2	1	2	4	1	3	161	53	3	2	3	3	2	2	1	2	3	1	2	3	3	2	2	3	1	1	3	4	3	5	5	5	4	5	4	4	4	4	4
1	2	2	2	2	2	3	158	74	2	3	2	1	2	3	3	2	2	1	3	1	2	2	3	1	1	3	2	5	4	5	4	3	3	4	4	5	4	3	4
2	2	1	5	3	2	2	177	76	1	2	1	2	2	1	2	1	3	2	3	3	2	1	5	4	5	5	4	5	3	4	5	4	4	4	4	3	5	4	5
1	1	1	3	3	1	3	182	75	5	4	4	2	3	4	4	4	4	4	4	5	5	3	2	3	3	2	2	4	4	3	5	3	4	3	4	4	5	5	4
2	1	1	2	5	1	2	177	73	3	1	2	2	3	3	3	3	2	1	3	2	2	1	3	1	2	2	1	1	3	1	2	2	2	3	3	3	4	4	5
2	1	1	4	4	2	2	172	73	3	2	1	1	1	1	3	2	1	3	2	3	2	2	1	2	1	1	3	4	4	3	5	5	4	4	4	4	3	5	5
2	1	1	3	1	2	3	176	60	1	1	3	2	2	1	2	2	2	2	1	2	2	1	5	4	3	3	5	4	4	3	3	5	4	3	4	4	4	4	4
1	1	2	4	4	1	2	165	57	2	3	2	2	1	3	2	1	1	1	1	1	1	2	2	2	3	1	1	4	4	3	4	3	3	4	5	4	3	3	5
2	1	2	2	3	2	2	166	51	3	3	3	3	4	4	3	5	4	5	5	4	4	2	2	1	1	2	3	3	4	3	5	4	4	4	4	4	4	3	1
2	1	2	2	2	2	4	174	53	2	2	1	2	3	1	2	1	2	1	1	2	3	1	3	2	1	2	3	4	4	5	5	5	4	4	3	4	4	4	4
1	2	1	3	3	2	3	166	64	3	3	2	2	2	3	1	2	2	2	1	3	2	2	2	2	3	1	1	4	5	5	4	4	5	5	4	4	4	5	5
2	2	1	5	1	1	2	160	58	2	1	2	2	3	2	2	1	1	3	2	1	2	1	3	3	2	2	1	4	4	4	3	4	3	5	5	4	5	4	3
1	2	1	2	4	1	3	170	73	4	2	4	4	4	3	4	3	5	4	3	4	3	4	2	1	3	2	1	4	3	4	4	4	3	5	4	5	5	4	5
1	2	1	4	2	1	4	159	52	1	1	3	1	3	2	2	2	2	1	2	2	2	3	4	4	3	4	5	3	4	5	4	4	5	5	5	5	3	2	3
1	2	1	1	4	1	3	178	73	2	3	2	1	3	2	1	2	2	2	2	1	2	2	1	1	2	3	1	5	4	4	4	4	3	5	5	5	4	4	4
1	2	2	4	2	2	3	166	52	3	5	5	4	3	3	3	3	5	3	4	5	4	3	1	3	1	3	2	4	3	4	4	5	5	4	3	5	4	4	4
1	2	1	3	1	1	5	169	58	3	2	2	1	2	3	3	1	1	1	1	2	1	2	1	1	1	1	1	3	5	4	5	5	4	5	4	4	5	4	4
1	2	2	2	4	2	5	172	62	1	1	2	1	1	1	1	2	2	1	2	3	3	2	1	2	1	2	1	5	3	5	5	5	5	4	4	4	4	5	4
1	1	2	5	2	2	3	163	65	5	4	5	2	2	5	3	3	4	5	4	5	4	3	2	2	2	1	1	3	3	4	3	2	1	4	1	2	1	1	1
2	2	1	1	2	1	3	170	54	3	2	2	1	2	3	3	1	1	1	1	2	1	2	2	1	2	2	3	5	3	4	4	4	5	5	3	3	4	3	5
1	2	1	4	2	2	3	158	47	3	2	3	1	2	2	2	1	2	1	1	1	3	3	3	2	1	1	1	3	4	3	5	5	3	4	5	4	3	4	5
2	1	1	5	3	2	3	165	72	2	2	3	3	1	3	3	2	3	2	2	2	2	2	2	1	2	2	1	4	3	3	4	5	3	4	3	5	4	4	4
1	1	1	1	2	1	3	165	64	1	1	2	3	2	2	2	2	2	2	2	2	2	1	5	3	5	4	3	5	3	4	4	5	5	4	5	5	4	4	4
2	2	2	1	4	1	3	175	63	1	2	2	2	2	2	2	2	1	1	2	2	1	1	1	3	1	3	1	3	3	1	1	1	1	1	2	2	3	1	2
1	2	2	2	4	2	4	161	61	3	3	5	3	3	4	3	5	3	5	5	5	5	4	4	4	4	4	5	2	2	2	1	1	3	3	1	4	2	1	2
2	1	2	5	4	2	1	175	67	2	2	2	1	3	1	1	2	2	1	1	2	2	2	1	2	3	3	1	4	5	5	3	5	5	3	5	3	4	4	4
2	2	1	4	1	2	3	166	74	2	2	1	3	1	1	3	3	1	1	1	1	1	2	1	2	2	2	1	5	5	5	5	5	5	3	4	5	5	5	4
1	2	2	4	3	2	1	163	54	2	2	1	1	2	1	1	2	2	3	2	2	2	1	2	1	2	2	3	4	5	4	4	3	5	3	4	4	4	4	4
1	1	1	2	3	2	4	168	68	1	2	1	3	2	1	1	2	2	1	2	2	2	3	1	1	2	1	2	3	5	5	4	4	4	4	5	4	4	5	3
2	1	2	2	5	2	3	176	69	2	2	1	3	3	2	2	2	1	2	2	2	1	2	2	2	1	2	3	5	5	4	4	3	5	4	4	5	5	4	4
1	2	2	3	4	1	3	163	69	1	2	1	2	2	1	2	1	3	2	3	3	2	1	1	3	3	2	3	5	4	5	4	4	5	4	4	4	5	4	5
2	2	2	4	5	2	2	170	64	1	3	3	2	2	2	1	1	3	3	2	1	3	2	1	1	1	2	2	5	5	3	3	5	4	4	5	5	4	5	5
2	2	1	2	1	1	1	160	50	3	2	2	2	2	1	2	1	2	1	2	1	3	1	3	1	1	2	1	3	5	4	3	4	4	4	4	3	5	4	3
1	1	1	4	3	1	2	163	50	5	3	5	5	3	3	2	4	4	3	3	3	5	5	3	4	3	3	3	1	3	1	3	3	2	2	1	1	2	2	1
1	1	1	4	3	1	2	171	71	3	1	2	2	3	3	3	3	2	1	3	2	2	1	2	1	1	1	2	4	5	5	3	5	3	3	5	4	2	1	3
1	2	1	5	4	2	3	174	76	2	1	2	2	2	1	2	2	3	3	2	2	1	2	3	1	2	2	1	4	5	4	5	3	4	5	5	4	4	3	3
1	2	2	4	2	2	4	181	70	2	2	2	1	3	3	2	2	2	2	1	3	1	2	2	2	2	1	3	4	4	4	4	3	5	3	4	3	5	4	3
1	1	1	4	1	2	2	163	68	4	4	4	4	3	4	4	4	5	4	4	5	5	5	2	2	2	2	3	1	1	1	2	1	4	2	2	3	4	5	3
2	2	2	5	1	2	2	178	54	2	1	1	2	1	3	1	3	2	2	2	2	2	2	2	1	3	2	2	5	4	3	5	5	3	5	3	4	5	4	4
1	2	1	4	1	2	3	166	47	2	1	1	2	1	2	2	3	3	1	3	2	1	2	3	1	2	1	2	4	5	4	4	4	4	3	5	4	4	3	3
1	1	1	5	4	2	4	164	54	2	1	2	1	3	2	1	3	2	2	1	2	2	1	3	2	2	2	2	2	2	2	3	3	1	1	1	1	5	5	4
2	2	1	5	2	1	3	162	65	2	2	2	3	1	3	1	2	2	1	1	2	2	2	3	3	2	3	1	5	5	4	5	4	4	5	3	5	4	4	4
2	2	1	2	4	1	2	158	75	2	2	1	2	2	1	1	1	1	2	2	2	3	1	1	3	1	2	2	5	5	4	5	4	5	4	5	4	4	4	4
2	2	2	2	2	2	3	157	46	2	3	5	5	2	5	5	3	4	4	4	3	3	4	1	2	2	2	1	3	4	3	4	5	3	5	5	5	4	4	5
2	1	1	5	4	2	3	165	69	3	1	1	1	1	2	2	2	2	2	2	2	1	1	1	1	1	3	2	3	5	5	3	4	3	5	3	4	4	3	3
2	1	1	5	5	2	5	169	67	2	2	1	2	2	1	2	2	1	3	2	1	2	1	2	2	1	2	3	3	4	4	3	4	4	4	5	3	4	4	4
2	2	1	5	4	2	1	163	76	1	3	2	2	1	1	3	3	1	2	1	2	1	3	1	2	3	2	2	2	1	2	3	1	1	1	1	1	1	3	1
1	1	1	1	4	2	2	161	50	2	1	2	1	1	1	1	2	1	2	2	2	2	1	3	3	2	3	2	2	3	1	2	3	3	3	3	2	5	5	5
1	1	1	5	1	1	4	178	69	2	3	2	1	2	3	3	2	2	1	3	1	2	2	1	2	1	1	2	4	4	5	4	3	4	3	4	4	1	2	2
2	1	1	3	2	2	1	167	73	1	1	2	3	2	2	2	2	2	2	2	2	2	1	3	2	1	2	2	4	4	5	5	4	4	5	3	5	4	4	5
1	2	1	4	4	2	1	162	53	3	4	2	3	3	5	5	5	4	5	4	4	3	5	1	3	1	2	2	1	3	2	2	2	1	1	4	1	2	1	1
2	2	2	2	4	2	1	180	54	2	2	3	3	1	3	3	2	3	2	2	2	2	2	1	2	1	3	1	4	5	4	5	5	4	5	5	5	4	3	3
1	2	2	2	3	2	2	167	49	4	5	4	5	3	3	5	3	5	5	5	4	4	4	5	3	5	4	3	2	2	3	2	4	3	1	2	3	2	3	1
2	1	1	3	3	2	3	165	66	2	2	1	1	2	2	2	2	2	1	2	3	3	2	1	1	2	2	1	4	3	4	5	3	5	5	4	5	5	4	4
2	2	1	2	5	1	2	174	72	2	1	3	2	2	2	2	2	1	2	2	3	2	2	2	1	3	1	1	5	4	4	4	3	4	5	5	5	4	5	4
1	1	1	1	1	1	4	162	60	4	5	5	3	5	3	5	3	5	3	5	5	3	3	5	5	4	5	4	4	5	5	3	5	3	3	5	4	3	1	2
1	1	1	4	2	2	2	164	76	4	3	3	5	3	5	5	4	4	5	4	3	5	4	4	4	4	4	4	3	2	1	1	1	3	2	2	2	1	1	1
1	1	2	4	4	1	3	176	56	2	2	3	2	1	2	2	1	1	2	2	3	3	2	2	3	2	2	1	3	4	4	4	5	4	4	5	3	4	4	5
2	2	2	5	1	2	1	176	61	3	1	3	2	2	1	2	1	3	3	3	2	2	2	4	3	5	5	4	5	4	4	5	4	5	5	4	4	5	5	4
1	1	1	5	3	2	1	164	73	1	1	1	2	1	1	3	2	3	1	1	1	2	2	2	2	2	2	1	4	4	4	4	3	4	5	5	5	5	3	4
1	1	2	1	3	1	1	160	53	2	2	1	2	2	2	2	1	2	1	1	1	2	3	1	2	2	2	2	5	5	4	5	4	5	4	4	5	4	3	4
1	2	1	1	5	2	2	157	56	4	3	4	3	4	3	3	5	3	5	3	5	5	5	1	2	3	3	1	4	5	5	3	4	4	5	5	4	5	5	3
1	2	2	1	4	2	3	182	46	3	3	2	1	2	2	1	1	2	2	2	1	1	1	3	2	1	2	3	5	3	4	4	5	4	3	3	4	3	5	3
2	2	1	3	1	1	2	161	53	3	3	2	2	2	1	3	2	1	3	1	1	1	3	2	1	3	2	2	4	3	4	3	4	3	5	4	4	4	4	4
2	2	1	4	1	2	1	163	46	1	2	2	1	1	1	3	1	1	1	2	3	1	2	2	1	1	2	1	4	3	3	4	5	3	4	3	5	2	1	1
1	1	2	5	2	2	1	164	59	2	1	2	3	1	1	2	1	1	2	1	2	2	1	4	3	5	4	5	3	4	4	3	4	4	4	5	3	1	1	1
1	2	2	2	3	2	2	171	75	3	2	1	2	2	1	1	1	1	3	1	1	2	1	2	1	3	1	1	5	3	5	4	4	4	4	3	4	4	5	3
2	2	2	5	2	2	3	169	48	2	2	1	1	3	1	3	1	2	1	2	3	3	3	1	2	1	2	3	4	5	5	4	4	5	5	4	4	4	5	5
1	2	1	1	1	2	3	159	56	1	2	1	1	2	2	2	2	1	3	2	2	1	2	3	5	5	4	5	5	4	3	5	4	5	5	5	5	3	5	4
1	2	1	4	1	1	3	161	65	2	2	2	3	2	2	1	3	1	1	2	2	2	2	3	2	2	2	2	5	5	5	4	4	4	5	5	4	4	4	4
1	2	1	2	3	1	1	170	51	2	1	1	3	2	1	2	1	2	1	3	1	2	1	3	1	1	2	3	5	3	5	4	5	4	5	4	5	4	5	5
1	2	1	5	6	2	2	179	58	2	2	3	3	2	2	1	3	2	2	2	1	3	3	1	1	2	1	2	4	3	4	3	5	4	3	4	3	5	3	3
2	2	1	3	1	2	4	177	53	3	3	2	2	2	3	1	2	2	2	1	3	2	2	3	2	1	2	1	5	5	5	5	4	5	5	3	5	5	5	5
1	1	2	4	2	1	3	172	53	1	3	2	3	1	3	3	2	1	2	2	2	2	2	3	2	1	1	1	5	5	5	5	4	4	5	3	5	5	3	4
1	2	1	5	3	1	2	178	65	1	1	2	3	3	1	1	1	1	1	2	1	1	1	2	3	2	2	1	3	5	4	5	3	5	5	4	4	5	5	5
1	2	1	1	1	2	1	170	71	2	3	1	2	2	3	2	2	2	3	3	1	3	2	1	1	2	2	3	5	5	5	4	4	4	5	5	4	4	5	4
1	1	1	5	3	2	3	176	50	2	2	2	1	2	3	2	2	1	3	2	1	1	2	2	2	2	2	1	4	4	3	5	4	5	4	5	4	4	4	4
1	2	2	3	2	2	1	173	65	1	1	1	2	1	2	1	2	2	1	2	1	1	1	2	1	2	2	1	5	5	3	3	5	4	4	5	5	5	4	5
2	1	1	2	1	2	2	167	53	4	3	3	3	3	4	5	3	3	4	3	5	5	2	1	1	2	2	3	5	5	3	5	5	4	4	3	3	3	5	5
2	2	1	2	1	1	3	164	73	2	1	3	1	3	2	1	1	1	1	2	2	2	2	1	3	3	3	2	3	4	5	4	3	5	5	5	4	4	4	4
2	2	2	2	6	2	2	167	54	2	2	2	1	2	2	2	2	2	2	1	3	1	2	3	2	2	2	2	2	1	2	2	3	3	1	1	1	4	3	3
1	2	2	4	1	2	4	160	75	2	2	2	3	1	1	2	2	2	2	2	1	2	1	2	2	1	2	3	3	4	5	4	4	5	5	5	5	5	4	4
2	1	2	3	5	2	2	178	64	1	1	2	2	1	3	1	2	2	1	2	1	2	3	5	4	3	3	3	4	3	5	4	5	4	3	5	3	4	5	3
2	1	1	1	3	1	3	178	70	4	4	4	5	3	2	3	3	3	3	4	3	3	4	4	4	5	4	5	2	2	3	2	3	2	1	3	1	2	2	2
2	1	2	1	1	2	4	159	70	3	3	3	3	3	3	4	3	4	4	5	5	3	3	4	5	3	5	4	3	3	1	1	2	3	3	4	1	1	1	2
1	1	2	5	1	2	2	174	49	3	5	3	3	5	2	4	3	2	5	3	5	4	5	3	2	2	1	1	4	5	4	4	5	5	4	5	3	2	2	2
2	1	1	2	6	2	2	157	48	2	2	1	2	1	2	2	3	3	3	1	3	1	1	2	2	3	3	2	1	3	1	3	3	3	1	1	1	4	5	5
2	2	1	1	3	2	3	178	72	5	4	3	3	4	4	2	2	4	3	4	3	4	4	2	2	2	1	2	2	1	2	3	1	1	1	1	1	2	3	2
1	2	1	3	4	2	3	161	51	2	2	2	2	3	2	2	2	3	2	3	2	2	2	3	1	3	2	2	3	4	4	4	5	5	4	5	4	4	4	4
2	1	1	3	3	1	4	177	69	2	1	3	2	2	2	2	2	1	2	2	3	2	2	3	1	1	1	3	4	4	3	5	5	4	4	4	4	4	4	5
2	2	1	4	2	2	4	165	71	2	1	1	2	2	3	1	2	2	1	2	2	3	1	3	5	5	4	5	1	3	1	2	2	3	3	1	2	4	4	5
2	2	1	4	1	2	1	176	46	5	3	5	4	4	5	3	4	3	2	4	5	3	5	5	4	2	3	5	1	2	1	3	2	2	1	2	1	5	4	5
1	2	1	2	2	1	2	174	69	1	2	2	1	1	1	3	1	1	1	2	3	1	2	2	2	2	1	1	4	4	3	5	3	5	4	3	4	4	5	3
2	1	1	2	3	2	2	159	61	1	1	3	1	3	2	1	3	2	2	2	3	3	1	1	3	2	2	2	3	3	4	5	4	4	5	3	5	5	4	4
1	2	2	3	3	2	3	161	50	2	3	2	3	2	2	1	1	2	1	2	2	2	1	1	1	2	1	2	4	3	5	3	4	5	5	5	5	4	4	4
2	1	2	4	1	1	2	177	72	2	3	2	1	3	2	1	2	2	2	2	1	2	2	1	2	3	2	3	4	3	4	5	4	4	3	5	4	4	5	5
1	1	1	5	3	2	3	174	73	2	2	3	3	1	3	3	2	3	2	2	2	2	2	2	2	2	1	2	5	4	3	5	4	5	5	5	5	4	4	4
1	2	2	2	2	2	4	159	60	2	2	3	2	1	2	2	1	1	2	2	3	3	2	3	1	3	3	3	3	4	5	3	5	4	3	4	4	3	5	5
1	2	1	1	1	2	2	169	60	2	3	3	2	2	2	2	2	2	3	3	3	3	1	2	3	3	2	3	4	5	4	4	3	5	5	5	4	4	3	4
2	1	1	1	4	2	3	164	64	5	3	5	3	4	3	5	4	3	4	3	5	4	5	4	3	5	3	3	3	3	3	1	3	2	2	1	3	3	1	3
1	1	2	5	1	2	3	164	58	1	2	3	2	1	2	2	1	1	1	3	2	2	2	1	1	1	1	1	3	3	1	3	3	3	2	1	1	3	4	4
2	2	1	5	1	2	4	182	61	2	2	2	2	3	2	3	2	2	2	2	2	2	2	2	1	2	2	2	3	3	5	4	5	4	4	4	4	4	3	3
1	1	2	3	3	2	1	172	75	2	2	3	3	1	3	3	2	3	2	2	2	2	2	2	1	2	2	2	4	3	3	4	5	3	4	3	5	4	4	4
2	2	1	2	3	2	2	170	74	4	3	3	3	4	4	4	4	3	4	2	4	5	4	4	3	5	5	4	3	3	1	1	3	3	1	2	1	3	3	3
2	1	1	4	4	2	1	161	53	2	2	3	2	2	1	2	1	2	2	1	1	1	2	2	2	2	2	2	5	4	3	4	4	3	5	5	5	4	4	4
1	2	2	4	1	2	1	161	46	1	1	3	2	1	2	1	3	1	3	1	1	2	2	1	1	1	2	1	3	5	4	3	4	4	3	5	5	3	4	4
2	2	2	4	2	1	1	158	54	4	3	3	4	2	3	5	4	5	4	4	4	4	2	2	2	2	1	3	4	3	4	3	4	4	3	4	3	5	4	5
1	2	1	1	2	1	2	167	61	2	2	2	2	1	2	2	1	1	2	2	2	1	1	1	2	3	2	3	4	4	3	5	4	5	4	5	4	5	4	3
2	2	2	3	3	1	2	173	63	2	2	2	1	1	2	2	3	1	1	3	2	2	1	2	1	2	1	2	4	4	4	5	3	4	4	4	5	1	2	1
2	1	2	3	1	2	1	159	76	1	1	3	1	3	2	2	2	2	1	2	2	2	3	1	1	1	2	2	2	2	1	2	3	2	1	2	3	5	4	4
2	1	1	4	1	2	3	171	50	3	2	2	1	1	2	3	2	2	3	3	2	1	2	3	4	3	4	5	4	4	3	5	5	4	4	4	4	4	4	4
2	1	1	2	2	1	2	180	57	2	1	2	2	3	1	2	3	1	1	2	2	1	2	2	2	2	2	2	4	3	5	5	5	5	3	5	3	4	3	5
1	1	1	4	3	2	3	171	59	1	3	1	2	1	1	1	2	2	1	3	2	3	3	2	2	2	1	1	4	5	4	3	3	3	4	3	4	4	5	4
1	2	2	2	3	2	4	177	47	2	1	1	2	2	2	2	2	2	3	3	1	1	3	2	3	2	2	1	5	4	3	4	3	3	3	4	4	4	3	4
1	2	1	4	3	2	3	181	68	3	3	5	4	5	4	4	4	2	5	5	3	2	5	2	2	2	2	3	2	2	2	3	2	4	4	3	1	4	4	5
2	2	2	4	2	1	2	167	75	3	2	2	2	1	2	2	1	2	2	2	1	2	1	4	3	2	5	3	2	1	1	1	3	3	2	3	3	1	1	2
2	2	1	2	2	2	3	164	64	2	1	3	2	2	3	2	2	2	3	1	1	1	2	3	1	1	1	3	4	4	4	4	3	3	4	5	4	3	1	3
1	2	2	1	3	1	3	170	54	2	1	2	1	2	2	1	1	3	1	1	2	3	2	2	1	1	1	3	4	4	5	3	4	4	5	4	4	4	5	3
1	2	2	4	1	1	3	167	73	2	2	2	3	1	3	1	2	2	1	1	2	2	2	3	1	1	1	3	5	5	3	4	4	3	4	5	4	3	1	2
2	1	1	3	1	1	3	161	57	3	1	1	1	2	3	1	1	1	1	1	2	2	2	1	2	2	1	3	5	4	4	4	5	4	4	4	4	5	4	4
1	1	2	4	3	2	2	182	50	1	3	3	2	2	2	1	1	3	3	2	1	3	2	3	2	1	2	2	3	4	4	3	4	5	3	5	5	3	2	1
1	2	2	4	3	2	1	176	63	1	1	2	3	3	1	1	1	1	1	2	1	1	1	1	1	1	2	2	4	3	3	1	1	1	1	3	2	5	3	4
2	2	2	5	3	2	4	177	56	3	2	3	3	2	2	1	2	3	1	2	3	3	2	1	2	2	3	2	3	2	1	2	2	3	2	1	2	4	4	2
2	2	2	1	4	2	3	161	50	3	3	1	1	2	2	1	1	1	2	1	2	2	1	2	2	2	1	1	3	1	2	2	2	1	1	1	1	3	2	2
1	2	2	3	1	2	3	177	59	4	4	3	5	3	5	5	4	4	3	4	4	5	4	5	4	2	3	5	4	3	5	4	5	4	3	5	3	4	5	5
2	1	2	1	1	2	2	171	60	1	2	1	3	2	1	1	2	2	1	2	2	2	3	5	5	3	4	5	4	3	5	4	5	4	3	5	3	5	5	4
2	1	2	4	1	2	1	176	47	1	2	1	1	2	2	2	2	1	3	2	2	1	2	1	3	1	3	2	4	4	4	5	5	4	5	5	4	4	5	5
1	1	1	1	2	1	3	172	76	3	3	4	5	3	5	5	3	4	3	4	3	4	5	1	2	1	2	3	4	5	5	4	5	4	4	4	4	3	5	4
2	1	2	5	2	2	4	167	69	3	4	2	3	4	3	5	3	5	3	4	4	5	4	1	1	1	2	1	5	3	5	4	4	4	3	4	5	5	4	4
2	2	2	3	1	2	3	170	59	2	2	1	2	3	1	2	1	2	1	1	2	3	1	3	4	4	5	4	5	4	3	5	4	5	5	5	5	5	5	5
2	2	1	1	3	1	2	167	55	3	2	1	2	2	1	1	1	1	3	1	1	2	1	2	4	3	5	5	4	5	4	3	3	5	3	5	5	4	5	4
1	2	2	4	4	2	2	169	52	5	3	3	4	5	4	3	4	3	2	5	4	2	3	3	5	4	5	3	1	1	1	2	3	2	2	2	1	1	1	1
1	2	1	4	1	2	3	169	74	2	2	3	2	1	2	2	1	1	2	2	3	3	2	1	3	1	2	2	4	4	4	3	5	5	4	5	4	1	3	2
2	2	1	5	1	2	3	170	48	1	1	2	2	1	3	1	2	2	1	2	1	2	3	1	1	3	1	1	5	3	4	5	4	4	4	4	3	4	4	5
1	2	1	5	3	2	1	171	69	2	1	3	1	2	1	1	1	1	2	2	3	2	1	4	5	3	4	3	4	4	5	4	3	4	3	4	4	4	4	4
1	1	1	4	1	2	3	170	67	1	1	2	2	1	1	2	1	2	2	1	2	2	1	2	1	2	1	2	4	3	5	3	5	4	3	4	3	5	4	5
1	2	1	5	4	2	5	165	50	2	1	2	2	2	1	2	2	3	3	2	2	1	2	5	4	5	5	5	3	4	4	4	4	4	5	5	5	5	4	3
1	1	1	4	2	2	4	180	65	2	1	3	1	2	2	2	1	2	1	2	1	2	1	2	2	2	2	2	3	4	3	5	4	4	5	4	5	5	5	5
2	2	1	2	1	1	3	168	74	5	3	3	2	3	4	4	4	4	4	5	5	5	5	1	2	2	2	1	3	5	3	4	3	4	5	5	3	5	5	5
1	2	2	1	2	1	3	182	46	2	3	1	2	2	3	2	2	2	3	3	1	3	2	1	1	2	3	1	4	5	5	5	5	5	5	4	4	5	4	5
2	1	1	2	3	2	4	174	70	2	2	1	3	1	1	2	2	2	3	2	2	2	2	2	2	3	2	2	1	3	2	3	1	1	1	3	3	4	4	4
2	2	1	1	1	1	5	176	53	2	2	3	3	2	2	1	3	2	2	2	1	3	3	1	2	2	3	3	4	4	5	3	4	4	5	4	4	4	5	5
1	2	1	5	3	2	2	170	53	2	5	3	4	3	3	3	3	4	3	4	5	5	5	3	4	5	5	5	3	3	3	1	3	2	2	1	3	2	2	3
2	1	1	4	5	2	1	157	60	5	2	5	3	3	5	4	5	4	5	3	4	5	3	2	2	2	1	1	3	4	5	4	5	5	5	3	4	3	3	4
1	1	1	2	1	2	3	171	72	2	2	1	3	1	1	3	3	1	1	1	1	1	2	3	1	2	2	3	3	4	4	3	5	3	4	5	4	4	5	4
1	1	1	5	2	2	3	176	49	1	1	1	2	1	2	1	3	3	1	1	3	2	3	2	1	3	2	2	5	5	3	3	5	4	4	5	5	5	4	3
2	1	1	2	3	2	1	163	62	1	1	2	2	2	2	2	2	2	2	1	2	3	1	2	3	3	2	3	4	4	3	5	4	5	5	4	4	3	4	5
2	2	1	2	3	2	4	167	55	2	3	3	2	1	1	1	1	1	2	3	2	1	1	1	1	2	2	3	3	4	3	5	4	4	4	4	4	5	4	5
2	2	2	5	1	1	2	161	60	5	4	3	2	3	5	5	4	4	5	3	3	3	2	4	2	5	3	5	1	1	3	3	2	3	2	1	1	3	2	3
1	2	1	2	1	2	2	166	58	2	2	3	2	1	2	2	2	3	1	2	3	1	2	3	2	2	1	3	3	4	5	5	4	3	4	5	4	4	5	3
1	2	2	1	1	2	3	159	55	2	2	1	2	3	1	2	1	2	1	2	2	1	2	1	1	1	3	2	3	5	3	4	3	4	5	5	3	3	3	4
1	2	1	5	2	1	1	157	70	3	2	2	1	1	2	3	2	2	3	3	2	1	2	5	5	3	4	4	4	3	4	5	5	5	5	5	4	4	4	5
2	2	2	2	3	2	3	165	62	4	5	4	5	3	3	5	3	5	5	5	4	4	4	5	5	5	5	4	3	3	1	4	3	4	2	3	3	3	2	3
1	1	1	5	2	1	2	179	48	5	4	3	5	4	4	4	5	4	4	3	4	4	5	1	3	2	2	1	3	4	3	4	3	4	4	5	5	5	3	5
2	2	2	1	3	1	3	174	69	2	2	2	1	3	3	1	1	2	2	1	1	2	3	2	2	1	1	1	5	4	4	5	5	4	4	5	4	5	5	4
2	2	2	5	1	2	2	163	73	1	1	1	2	1	3	1	1	1	3	1	1	1	2	2	2	3	2	1	4	4	4	5	3	4	4	4	5	4	4	4
1	2	1	2	1	2	3	170	61	1	1	2	3	3	1	1	2	2	2	1	1	2	2	3	2	2	1	1	5	3	4	4	3	4	5	3	5	4	4	4
1	2	1	1	4	1	4	162	67	2	1	1	2	1	3	1	3	2	2	2	2	2	2	2	2	2	1	1	4	4	5	5	4	4	5	3	5	4	5	5
1	1	2	2	4	2	3	169	72	2	1	1	3	3	3	3	1	3	1	3	1	2	2	1	2	3	2	3	5	4	4	4	5	4	5	5	3	4	5	3
2	1	2	2	5	2	5	161	61	2	1	1	1	2	2	3	1	2	1	2	2	2	1	2	2	2	2	3	4	4	4	5	3	4	4	4	5	5	4	4
1	2	1	1	3	2	2	162	48	1	2	1	2	2	1	2	1	3	2	3	3	2	1	2	3	4	5	5	4	4	3	3	5	4	3	4	4	5	3	4
2	2	2	4	1	1	3	168	57	1	1	2	2	1	1	2	1	2	2	1	2	2	1	3	2	1	2	3	4	3	4	3	4	4	3	4	3	3	5	3
1	1	2	3	2	2	2	172	58	2	2	2	3	1	3	1	2	2	1	1	2	2	2	4	3	2	5	3	3	5	4	3	4	4	3	5	5	2	1	1
2	1	2	4	3	1	2	177	60	1	2	2	2	2	2	2	2	1	1	2	2	1	1	2	2	2	1	1	5	5	4	5	4	5	4	5	4	4	4	5
1	1	2	5	2	1	2	161	56	1	1	2	1	1	1	1	2	2	1	2	3	3	2	4	5	5	3	3	4	3	5	4	3	4	4	3	4	1	3	2
1	2	1	4	3	2	4	167	62	2	1	1	1	1	1	2	2	3	1	2	2	2	2	2	1	2	3	2	4	5	4	3	3	3	4	3	4	5	5	4
1	2	2	4	2	1	2	158	68	1	2	2	2	1	3	1	1	2	3	2	2	2	2	2	2	2	1	3	5	5	3	5	5	4	4	3	3	5	5	3
2	1	2	5	3	1	5	168	54	2	1	3	2	2	3	2	2	2	3	1	1	1	2	2	1	2	2	3	4	4	3	4	5	4	5	5	4	5	4	5
2	2	1	5	5	1	3	162	72	1	1	1	1	2	2	1	3	2	2	1	2	1	1	2	2	2	2	2	5	3	3	3	5	4	4	4	4	2	2	2
1	2	2	4	4	1	5	172	51	3	1	2	2	3	3	3	3	2	1	3	2	2	1	3	1	2	2	2	4	4	4	4	3	4	5	5	5	5	4	4
1	2	1	5	4	1	2	182	52	2	2	1	2	3	2	3	2	1	1	2	2	2	3	3	1	1	2	1	3	4	5	3	5	4	3	4	4	5	5	4
1	1	1	1	6	2	1	178	66	2	2	2	2	2	3	3	2	1	2	2	1	2	2	2	1	2	1	3	5	4	4	5	4	4	5	3	5	4	4	4
1	2	1	2	1	2	2	169	63	4	3	3	3	4	5	5	5	3	3	3	4	5	3	5	3	4	4	3	2	1	3	2	1	2	1	1	2	2	2	2
1	2	2	4	2	2	3	161	76	2	2	2	1	3	1	1	2	2	1	1	2	2	2	2	3	3	1	1	4	4	4	5	5	3	5	4	5	4	4	4
2	2	2	3	3	2	3	169	52	4	3	2	5	4	2	4	5	3	3	2	3	4	4	4	4	3	5	5	1	1	1	2	1	1	3	1	1	4	5	4
1	2	2	5	3	2	4	158	60	3	3	1	1	2	2	1	1	1	2	1	2	2	1	2	1	1	2	2	4	4	4	5	3	4	4	3	5	4	4	4
2	2	2	5	2	2	3	160	57	5	3	4	5	4	3	4	5	4	3	3	3	5	5	3	5	3	3	3	3	2	3	4	3	1	1	2	1	1	1	2
1	2	1	2	2	2	2	174	62	2	3	2	5	3	3	5	5	5	5	5	4	2	4	5	3	5	3	4	3	1	2	2	3	3	1	2	2	1	1	1
1	1	1	3	2	2	1	181	76	1	2	2	2	2	1	1	2	1	1	3	2	2	2	2	2	2	2	2	1	3	1	1	3	1	1	2	1	5	3	4
1	2	1	4	1	1	1	175	68	5	2	5	4	4	5	4	3	3	3	5	4	4	3	4	5	3	4	5	2	2	3	2	2	2	3	3	3	2	1	1
1	1	1	4	1	1	2	181	54	2	2	2	2	1	2	2	1	3	1	2	2	3	2	2	2	1	1	3	5	4	5	5	4	5	4	3	4	4	4	4
2	2	2	3	1	2	5	172	75	2	1	1	2	1	2	1	2	1	2	1	2	2	2	2	2	3	3	2	4	5	3	5	4	3	4	3	4	4	5	5
2	2	1	1	4	2	3	169	50	2	3	2	2	2	3	2	3	2	1	2	1	1	2	3	2	2	2	1	4	3	4	5	5	5	4	5	4	5	4	3
1	2	1	5	2	2	2	157	63	1	1	2	3	3	3	2	2	2	1	2	1	1	3	1	1	1	2	2	4	3	3	4	4	5	4	3	3	4	4	4
2	1	1	1	4	2	3	160	62	2	1	2	1	2	2	3	2	1	2	2	2	1	1	3	1	1	1	3	4	4	4	3	3	5	3	4	5	4	4	5
1	1	2	5	4	1	2	177	76	2	1	2	2	2	2	3	1	3	2	2	1	2	1	1	2	1	3	1	4	4	4	4	5	4	4	4	4	5	5	4
1	2	2	1	2	2	3	167	50	1	3	1	2	2	1	2	1	3	2	2	2	1	1	2	3	1	2	1	2	1	2	4	1	2	3	3	3	5	5	4
1	1	1	3	2	1	1	169	56	1	1	2	2	1	3	1	2	2	1	2	1	2	3	3	2	2	2	1	4	4	4	4	4	4	4	5	4	4	5	5
1	1	2	3	4	1	2	169	60	3	3	2	2	2	1	3	2	1	3	1	1	1	3	2	2	2	3	3	4	5	5	4	4	5	5	4	5	4	4	4
1	1	1	3	4	1	3	176	58	2	2	3	2	2	2	2	2	2	1	1	2	1	2	2	3	1	1	3	3	4	3	4	5	3	5	5	5	3	4	5
1	2	2	3	1	1	3	167	76	4	3	3	3	4	4	4	4	3	4	2	4	5	4	4	2	3	5	4	3	2	1	1	3	2	1	3	3	3	4	4
1	2	2	4	4	2	3	179	53	1	1	2	3	3	1	1	1	1	1	2	1	1	1	5	5	3	3	3	4	3	5	4	5	4	3	5	3	5	5	4
2	2	1	2	5	1	3	162	46	1	2	1	1	2	2	2	2	1	3	2	2	1	2	2	2	3	3	2	3	4	5	4	5	5	5	3	4	5	3	4
2	2	1	4	4	1	4	161	49	4	3	2	5	4	2	4	5	3	3	2	3	4	4	5	5	2	5	3	2	2	3	4	2	2	1	2	1	2	1	3
2	1	2	2	1	1	1	166	62	3	3	4	5	3	4	5	3	5	3	3	5	4	4	5	3	4	3	4	3	3	3	3	1	1	3	2	1	1	2	2
2	2	1	1	1	2	1	166	60	1	2	1	2	2	1	2	1	3	2	3	3	2	1	2	1	2	2	1	5	5	4	4	4	4	4	4	5	5	3	4
2	1	1	4	2	1	3	175	68	2	1	3	1	2	3	1	2	2	2	2	3	2	1	1	1	2	1	2	5	5	3	4	4	3	4	5	4	4	4	4
1	1	2	4	1	1	3	182	63	3	4	2	3	4	3	5	3	5	3	4	4	5	4	2	3	2	2	1	3	4	4	4	5	4	4	5	3	3	4	4
1	1	1	1	2	2	3	182	72	2	1	2	1	2	2	1	1	3	1	1	2	3	2	3	2	2	2	3	4	5	3	4	4	5	4	5	5	5	4	4
2	2	2	1	2	1	3	178	66	4	4	4	4	5	2	4	5	4	4	3	4	4	5	5	4	3	4	5	1	3	1	3	3	1	1	1	3	2	1	2
2	2	2	5	1	1	2	164	73	1	1	1	2	1	2	1	3	3	1	1	3	2	3	4	4	4	5	4	4	5	5	4	4	5	5	4	4	4	4	5
1	1	1	5	4	2	1	164	51	1	3	3	1	3	2	2	1	1	2	1	3	2	1	3	2	1	2	1	3	5	5	4	4	4	4	5	4	5	5	4
2	2	2	1	2	1	3	166	69	3	4	3	4	3	3	5	5	4	3	3	3	2	3	3	3	4	3	5	5	4	4	4	5	5	4	5	4	4	4	4
1	1	2	1	3	2	2	162	76	1	1	1	2	1	1	3	2	3	1	1	1	2	2	1	3	3	3	2	4	3	4	3	5	4	3	4	3	5	3	4
1	2	1	3	1	2	2	162	46	2	2	2	1	2	1	2	2	3	3	1	2	2	1	1	1	1	2	1	4	5	3	4	5	5	3	4	4	2	1	3
1	2	2	4	1	1	1	177	46	1	1	2	3	3	1	1	2	2	2	1	1	2	2	1	3	2	2	1	4	5	4	4	5	5	4	5	3	4	4	4
2	1	2	5	4	1	3	168	74	2	2	1	1	1	2	1	1	1	1	2	3	1	3	2	1	2	2	1	3	5	4	5	5	4	5	4	4	4	4	5
1	1	2	1	3	1	2	165	49	2	2	2	1	2	3	3	1	1	3	2	2	1	2	2	3	5	4	4	2	3	1	1	2	3	3	3	1	2	1	2
2	1	2	1	2	1	2	169	48	4	2	4	4	4	3	4	3	5	4	3	4	3	4	4	4	5	3	4	1	2	3	2	2	1	3	2	3	3	1	2
1	1	1	4	2	2	3	157	63	3	4	5	2	4	4	3	5	5	4	4	4	4	4	2	3	3	2	3	4	1	3	2	4	3	1	3	1	3	1	1
2	2	2	3	2	2	2	162	63	1	1	1	2	1	2	1	3	2	2	3	3	1	2	2	2	1	1	1	4	3	5	5	5	4	4	4	5	5	4	4
1	2	2	5	1	2	3	162	61	3	2	1	2	2	1	1	1	1	3	1	1	2	1	2	3	2	2	1	3	4	4	3	4	5	3	5	5	4	4	5
2	1	1	1	4	2	1	172	71	2	2	2	1	1	1	2	1	2	2	2	1	2	1	3	2	1	2	3	5	5	5	5	4	4	5	3	5	3	4	5
2	2	1	3	1	2	4	158	55	1	1	1	2	2	1	2	2	2	2	2	1	1	1	2	2	2	2	1	4	3	4	3	4	3	5	4	4	5	4	4
2	2	1	4	4	1	5	168	62	2	3	5	5	2	5	5	3	4	4	4	3	3	4	1	1	3	2	2	4	1	3	2	3	2	2	2	3	4	3	4
1	2	1	3	1	2	3	179	72	2	2	3	3	2	3	1	1	1	1	3	2	2	2	3	3	2	2	2	5	4	5	4	4	4	4	4	3	3	4	3
2	2	2	2	3	1	2	182	56	2	1	3	1	2	1	1	1	1	2	2	3	2	1	2	3	2	1	2	4	5	4	4	4	4	5	3	5	5	5	5
1	2	1	3	3	2	4	166	72	3	2	2	3	2	2	1	2	1	1	1	2	1	1	2	1	2	2	3	4	5	5	3	5	3	5	5	5	5	3	4
2	1	1	2	1	2	3	179	60	3	4	5	2	5	4	3	4	4	5	4	4	5	3	5	4	3	3	3	1	1	4	3	3	3	3	1	4	1	3	2
2	2	1	1	5	2	2	178	74	2	2	2	1	3	1	1	2	2	1	1	2	2	2	5	5	3	3	3	2	2	2	2	3	2	3	3	4	3	4	4
1	1	1	3	2	2	3	178	56	2	1	2	2	3	2	2	1	1	3	2	1	2	1	3	5	4	4	2	2	2	2	1	2	3	3	2	1	5	5	4
1	2	1	5	2	2	3	168	68	2	1	3	2	2	2	2	2	3	1	2	3	1	2	1	2	2	2	2	3	4	5	5	4	3	4	5	4	5	3	4
2	1	1	4	1	2	5	159	51	3	2	2	2	1	2	2	1	2	2	2	1	2	1	1	2	2	2	1	3	3	5	4	5	3	5	4	3	5	3	4
2	2	1	2	3	2	2	176	46	1	2	3	1	3	1	1	1	2	2	2	3	1	1	2	2	1	1	1	2	2	3	1	1	2	2	1	3	3	3	5
1	1	1	4	1	1	1	161	64	5	4	3	5	3	5	3	3	5	5	3	3	4	3	2	1	2	2	1	5	4	5	3	4	4	5	5	5	5	5	4
1	2	1	1	2	2	1	166	60	3	2	3	3	2	3	3	3	2	2	1	1	1	3	3	1	1	2	3	5	3	4	4	5	4	4	5	3	5	5	5
1	1	1	2	2	2	1	180	52	2	2	2	2	3	2	3	2	2	2	2	2	2	2	2	2	2	3	3	3	3	5	4	5	4	4	4	4	4	5	3
1	2	2	2	2	2	4	163	56	2	1	1	2	2	2	2	2	2	3	3	1	1	3	1	1	2	1	2	5	4	4	4	3	4	5	4	5	4	4	4
2	1	2	1	1	2	3	172	69	4	5	4	4	5	4	4	3	3	4	3	4	5	4	5	5	4	4	5	1	1	3	3	1	2	3	2	1	3	1	1
2	1	2	1	1	1	3	162	47	2	2	1	2	3	2	3	2	1	1	2	2	2	3	3	1	3	2	2	3	4	4	3	4	4	4	5	3	5	5	5
2	2	1	1	4	1	3	180	49	1	1	2	2	2	1	2	2	1	2	2	3	1	2	2	2	2	3	3	4	3	5	5	4	4	4	3	4	5	3	4
2	1	2	1	1	2	3	169	51	2	3	1	1	1	1	3	3	1	3	3	2	2	2	3	3	2	2	1	1	1	3	3	1	2	3	2	1	3	4	5
2	1	2	1	4	2	1	163	59	2	2	3	1	3	1	3	2	3	1	2	2	1	3	2	2	2	2	1	4	3	4	5	5	5	4	5	4	4	5	4
2	1	2	5	1	2	2	178	50	2	2	2	1	1	2	1	1	2	1	1	1	2	1	2	2	2	2	1	4	4	4	3	4	3	5	5	4	5	5	4
2	1	2	3	1	1	2	160	53	2	2	2	2	1	2	2	1	1	2	2	2	1	1	1	1	2	3	3	5	3	5	3	3	4	4	5	4	5	4	3
1	1	2	5	5	1	3	175	73	4	3	3	5	5	5	3	3	5	5	3	4	4	5	2	2	2	3	3	4	5	4	3	3	5	3	5	5	4	4	4
1	2	2	2	1	2	3	169	53	4	5	5	3	3	3	3	3	3	4	4	4	3	2	3	1	1	1	3	4	5	5	5	5	5	4	4	5	5	4	5
1	2	2	5	3	2	3	157	66	4	3	3	3	3	4	5	3	3	4	3	5	5	2	3	3	4	4	3	1	2	3	3	2	1	3	1	2	3	3	2
2	2	2	2	4	2	3	181	73	3	3	5	5	4	5	4	5	3	3	4	5	3	4	3	3	2	2	2	3	4	5	4	3	5	5	5	4	5	4	4
2	1	2	5	1	2	3	178	67	5	5	3	5	5	4	4	4	5	2	4	3	4	5	1	1	2	2	3	5	4	4	4	5	4	5	5	3	4	3	4
1	2	1	4	4	1	3	181	76	1	1	3	2	2	1	2	2	2	2	1	2	2	1	2	1	2	3	1	3	4	5	4	5	5	5	5	5	5	3	4
2	2	1	1	1	1	3	167	56	2	1	2	1	2	2	1	2	1	2	1	1	3	3	1	3	2	2	2	4	4	3	5	4	4	4	4	4	1	3	2
2	2	2	5	2	1	2	166	50	5	3	5	5	3	3	2	4	4	3	3	3	5	5	1	1	3	1	1	3	4	4	4	4	4	5	5	5	3	3	2
2	1	2	4	2	1	3	170	69	2	2	1	1	2	3	1	2	2	1	2	2	2	2	2	1	2	2	1	4	3	1	3	3	1	3	1	3	5	4	3
2	2	2	4	1	2	2	165	73	1	3	1	2	1	1	1	2	2	1	3	2	3	3	1	2	3	2	2	5	4	4	4	4	3	5	5	5	4	5	5
2	2	2	2	1	2	4	170	60	2	1	1	2	1	3	1	3	2	2	2	2	2	2	4	4	3	5	3	3	1	1	1	2	4	1	2	1	2	2	1
1	1	1	1	2	2	4	162	61	3	2	3	1	2	2	2	1	2	1	1	1	3	3	5	5	4	5	3	5	4	4	5	5	3	5	5	5	5	4	5
1	1	2	5	4	2	2	178	54	5	3	5	3	4	4	3	4	3	5	2	4	4	5	4	4	3	5	4	4	3	5	3	4	5	5	5	5	4	4	5
1	2	1	4	1	1	1	164	65	2	2	3	1	1	2	1	2	2	2	2	2	1	2	2	2	1	1	1	5	4	3	4	4	3	5	5	5	5	4	5
1	1	2	5	5	2	3	159	60	1	1	2	2	2	2	2	3	2	2	3	1	3	2	1	2	3	2	3	5	3	4	4	4	5	5	3	3	3	5	3
2	2	1	3	2	2	3	170	48	3	2	3	1	2	2	2	1	2	1	1	1	3	3	2	3	3	1	1	4	4	4	3	5	5	4	5	4	3	5	3
1	1	1	2	1	2	2	174	53	4	3	3	3	4	4	4	3	5	3	5	3	5	5	1	1	1	1	1	5	4	4	5	5	3	5	5	5	5	3	4
2	1	1	5	2	1	4	169	48	2	1	2	2	3	2	2	1	1	3	2	1	2	1	4	4	5	3	4	4	5	3	5	4	3	5	5	4	5	5	4
1	2	2	2	2	1	4	176	53	2	1	1	1	2	2	3	1	2	1	2	2	2	1	3	3	2	3	2	4	3	4	5	5	5	5	5	4	4	4	4
2	1	1	2	4	2	2	158	57	4	5	4	4	4	3	3	4	4	5	3	4	3	3	2	4	3	5	5	4	3	4	5	5	5	4	5	4	5	5	4
1	2	1	1	3	2	3	172	52	4	4	3	5	3	5	5	4	4	3	4	4	5	4	3	3	4	3	5	2	4	2	1	1	1	3	3	3	2	3	1
1	2	2	3	3	1	1	161	56	2	3	1	2	1	2	1	2	2	2	1	1	1	2	2	1	2	1	2	4	5	4	5	3	4	5	5	4	3	5	3
1	2	1	5	3	2	4	160	56	1	1	2	2	2	3	1	2	2	3	2	2	1	3	1	3	2	2	2	5	4	4	5	4	4	4	4	5	4	4	5
1	2	1	4	2	2	4	164	71	3	3	5	5	4	5	4	5	3	3	4	5	3	4	4	4	4	4	3	3	1	3	3	2	1	3	3	1	3	2	3
1	2	1	2	4	2	1	170	68	2	5	5	4	2	4	3	3	4	4	4	5	4	4	2	3	1	2	1	4	4	3	3	5	4	3	4	4	4	5	3
1	2	1	3	2	1	5	168	63	4	2	3	5	4	5	4	3	4	5	3	4	4	5	3	1	2	2	2	4	3	5	5	5	4	5	4	4	4	3	5
1	1	1	4	1	2	1	175	76	5	3	3	2	5	3	4	2	3	4	4	4	4	4	3	3	2	2	1	2	3	3	1	4	1	2	3	3	3	1	1
1	2	1	1	4	2	3	158	53	2	2	3	1	2	2	1	2	1	2	1	3	1	2	2	1	2	2	1	4	4	4	4	5	5	4	4	5	4	4	5
2	2	1	5	2	2	2	179	71	2	2	2	1	2	3	3	1	1	3	2	2	1	2	2	1	2	3	1	4	5	3	5	4	4	5	5	4	4	4	5
2	2	2	3	4	2	1	178	60	1	1	1	2	1	2	1	3	2	2	3	3	1	2	1	1	3	2	2	3	4	5	3	5	4	3	4	4	5	3	5
1	1	1	4	1	1	4	181	74	2	1	2	1	3	2	1	3	2	2	1	2	2	1	1	3	2	2	2	5	4	5	5	4	5	4	3	4	4	4	4
1	1	2	5	1	2	1	167	47	3	3	2	1	1	1	1	3	2	2	3	3	2	2	2	3	1	2	2	4	3	5	5	5	5	3	5	3	5	5	5
1	2	2	5	4	1	3	171	51	2	3	1	2	2	3	2	2	2	3	3	1	3	2	2	1	1	1	3	3	5	3	5	3	4	4	4	4	5	5	3
1	2	1	3	3	1	3	171	50	2	2	2	3	2	2	1	3	1	1	2	2	2	2	2	2	2	1	3	3	5	4	5	3	5	5	4	4	4	4	5
1	1	1	4	2	1	5	168	46	1	3	2	3	2	2	2	2	2	1	1	1	2	2	2	2	1	2	3	4	4	4	3	3	5	3	4	5	4	3	3
1	2	2	1	2	2	1	172	57	2	2	2	2	1	2	2	1	3	1	2	2	3	2	2	2	1	1	1	4	3	5	5	4	5	4	5	3	4	4	5
1	2	1	3	6	2	2	168	50	3	2	3	2	2	2	2	2	2	2	2	1	1	1	2	1	3	2	1	4	4	3	4	5	4	5	3	3	5	3	5
2	1	1	5	3	2	3	177	68	4	4	5	5	5	4	5	3	3	3	5	4	5	2	4	5	3	3	3	3	3	1	1	3	3	1	2	1	2	2	3
2	1	2	2	1	2	1	173	68	5	5	3	5	5	4	4	3	4	4	3	3	5	3	3	3	4	3	5	4	3	5	5	4	5	4	5	3	4	5	4
1	2	1	4	1	2	3	174	56	3	1	1	3	1	3	3	2	1	2	2	3	3	1	2	1	1	1	2	4	4	5	5	4	5	4	4	5	4	4	4
1	1	1	4	5	1	1	175	55	2	2	3	1	2	3	1	3	1	1	2	1	1	1	2	2	2	1	2	3	5	5	3	4	3	5	3	4	4	5	3
1	2	2	1	5	2	3	164	57	2	2	2	3	1	2	2	3	3	2	2	2	2	2	2	3	2	1	1	3	4	4	4	3	5	4	4	3	2	3	1
1	2	1	5	2	2	3	173	69	5	5	4	4	3	3	3	5	3	3	5	5	3	3	5	3	3	3	3	3	4	3	2	2	2	1	3	3	1	1	1
1	1	1	3	3	2	2	158	53	2	2	2	1	3	1	1	2	2	1	1	2	2	2	3	3	3	2	1	3	4	5	4	5	4	5	5	4	3	4	5
2	2	2	2	2	2	4	162	54	3	3	1	1	2	2	1	1	1	2	1	2	2	1	3	3	2	2	1	4	3	5	5	5	5	4	4	5	5	5	5
1	2	1	1	1	1	3	162	70	1	2	2	2	2	1	1	2	1	1	3	2	2	2	2	2	2	1	2	4	5	3	5	4	3	4	3	4	3	4	4
1	1	1	1	3	2	3	182	46	1	2	3	2	3	3	3	2	1	1	3	2	1	1	3	4	4	3	3	4	5	4	4	3	5	5	5	4	4	5	5
2	2	1	5	2	2	4	174	59	1	3	2	2	2	2	2	2	2	2	1	2	1	1	3	2	1	2	2	4	4	4	4	4	4	4	5	4	5	3	5
2	2	1	2	4	1	1	160	69	2	1	1	2	2	1	2	3	3	1	2	1	2	1	2	1	3	2	3	5	4	3	5	4	5	5	5	5	4	3	5
2	2	1	2	4	1	3	173	76	1	2	3	2	3	1	2	2	1	3	2	2	1	3	1	1	3	1	1	3	4	4	4	4	5	4	3	5	3	1	2
1	2	1	3	3	1	3	157	48	1	1	1	2	1	1	2	2	2	1	2	2	2	1	3	3	4	5	2	4	5	3	5	4	3	5	5	4	4	4	4
2	2	1	5	2	1	2	160	56	2	3	3	2	1	1	1	1	1	2	3	2	1	1	2	1	2	2	1	4	3	4	5	3	5	5	4	5	5	5	4
1	1	1	2	3	2	1	157	70	1	3	3	2	1	2	3	1	2	3	2	1	1	1	3	2	1	1	1	4	4	3	3	5	4	3	4	4	5	5	4
2	2	1	5	4	1	1	182	65	4	4	3	5	5	5	5	3	5	4	5	4	4	4	3	3	2	2	1	4	5	3	4	4	5	4	5	5	5	4	4
2	2	2	1	1	1	5	168	62	1	2	2	2	1	3	1	1	2	3	2	2	2	2	2	1	2	1	2	3	4	5	4	5	4	5	5	4	4	4	5
2	2	1	3	4	1	3	178	56	2	4	4	5	5	3	3	4	4	4	3	5	4	2	5	5	4	5	4	2	1	1	2	3	3	3	2	4	4	1	1
1	2	1	4	1	1	3	166	53	3	2	2	3	1	3	2	1	2	2	2	3	2	3	2	2	2	1	1	4	4	5	5	4	4	5	4	5	5	3	3
1	1	1	5	2	2	4	160	70	1	1	2	1	2	2	1	2	2	2	3	2	2	2	3	2	1	2	2	1	1	3	3	1	2	3	2	1	5	4	5
1	2	2	1	3	2	2	159	72	2	1	2	2	3	2	2	1	1	3	2	1	2	1	5	3	5	3	5	5	5	3	3	5	4	4	5	5	3	4	4
2	1	1	4	4	2	3	176	72	2	1	3	2	1	3	1	1	1	2	1	1	3	1	2	1	2	3	1	3	5	5	4	5	5	4	5	5	4	3	4
2	2	1	5	3	2	5	169	66	4	3	5	3	4	3	3	4	4	5	4	5	3	4	5	5	3	2	5	2	3	3	2	2	2	3	1	1	3	2	2
1	2	1	4	2	1	1	170	49	2	2	3	1	1	1	1	1	3	3	2	3	3	1	1	1	1	2	2	4	4	4	5	3	4	4	3	5	4	5	3
2	2	2	3	1	1	3	167	52	1	3	1	2	2	1	2	1	3	2	2	2	1	1	4	4	4	3	3	5	5	5	5	4	4	5	3	5	5	4	4
1	1	1	2	1	2	3	167	57	3	2	3	3	2	3	3	3	2	2	1	1	1	3	2	2	3	3	2	5	4	4	4	4	4	4	3	4	5	3	4
1	1	1	4	2	2	2	179	48	3	2	2	1	1	2	1	2	2	1	2	2	1	1	4	3	5	3	3	3	3	4	5	4	5	4	5	4	4	3	5
2	1	1	5	3	2	2	176	60	3	3	3	4	5	4	3	5	4	5	2	3	3	4	3	5	4	5	4	1	2	1	2	1	1	2	1	3	1	1	1
2	1	1	4	1	1	3	171	69	1	1	2	2	1	2	2	1	1	1	2	3	1	3	2	1	2	1	3	4	3	5	5	5	4	5	4	4	5	4	4
1	1	1	3	3	1	2	180	74	5	5	4	4	3	4	3	3	5	3	3	5	3	3	4	3	3	3	5	1	1	3	2	1	1	3	1	3	3	2	3
1	1	2	2	3	1	1	174	65	2	1	3	2	2	2	2	2	1	2	2	3	2	2	3	2	3	2	2	4	5	4	5	5	4	5	5	5	3	3	5
1	1	2	4	1	1	3	177	50	3	2	2	2	1	2	2	1	2	2	2	1	2	1	4	4	4	5	4	3	4	5	4	3	5	5	5	4	1	2	2
1	2	2	5	1	2	1	168	55	4	4	5	5	4	4	5	4	5	3	5	3	5	5	4	3	3	5	4	1	1	3	3	2	3	2	1	1	1	2	2
2	2	2	5	2	2	3	180	47	5	5	5	3	4	5	4	3	2	5	5	4	4	5	5	4	5	4	4	3	2	2	3	4	2	2	3	1	1	2	3
2	2	1	4	4	1	2	177	60	2	2	1	3	1	3	1	1	3	1	2	2	2	3	2	1	2	2	1	4	3	5	5	5	5	4	4	5	5	4	5
2	2	2	2	2	2	3	163	69	1	2	2	1	1	1	3	1	1	1	2	3	1	2	1	3	1	2	2	2	2	2	1	1	3	3	1	4	3	4	3
1	2	1	2	1	2	3	168	68	2	2	1	1	1	2	1	1	1	1	2	3	1	3	2	1	1	1	1	5	4	4	5	4	4	4	4	5	4	4	5
2	1	1	5	3	1	3	172	55	3	2	3	1	2	2	2	1	2	1	1	1	3	3	1	1	2	2	3	4	3	5	5	5	5	4	4	4	4	5	5
2	2	1	4	5	2	1	175	66	1	1	3	1	3	2	1	3	2	2	2	3	3	1	4	4	3	5	5	3	4	5	4	5	5	5	5	5	4	5	3
2	2	1	1	2	2	3	173	63	3	3	3	4	5	4	3	5	4	5	2	3	3	4	3	4	3	3	3	1	3	3	3	2	3	1	2	1	2	2	2
2	2	2	4	4	2	4	175	60	1	2	2	2	1	3	1	1	2	3	2	2	2	2	2	2	1	2	2	2	1	1	1	1	2	3	3	1	3	5	5
2	1	2	2	1	1	4	166	53	2	1	3	1	2	1	2	3	2	2	2	2	1	2	1	1	2	1	2	3	4	4	4	4	3	5	5	3	5	5	5
1	2	1	4	3	2	3	159	62	2	2	3	3	2	3	1	1	1	1	3	2	2	2	3	3	2	3	2	5	4	3	4	3	3	3	4	4	3	4	5
2	1	2	2	4	2	4	178	69	2	2	2	3	1	2	2	3	3	2	2	2	2	2	1	1	1	2	2	5	4	4	5	5	3	5	5	5	5	5	4
2	2	1	2	2	2	4	176	76	3	5	2	5	4	4	4	5	3	5	4	5	5	5	2	1	3	1	2	1	3	1	3	2	2	2	1	1	5	4	4
1	2	1	4	1	1	5	168	49	1	2	3	1	2	2	2	1	3	2	1	1	3	3	2	1	2	2	2	3	5	5	4	5	5	4	5	5	4	5	4
2	1	2	5	1	1	1	169	59	2	3	2	2	1	2	2	3	2	2	1	1	3	1	1	2	1	2	3	2	2	3	2	4	3	1	2	3	3	4	5
1	2	1	5	5	1	3	181	46	5	3	3	2	5	3	4	2	3	4	4	4	4	4	2	3	3	2	2	4	5	5	3	5	3	5	5	5	4	4	4
1	2	2	5	5	1	3	181	49	4	5	4	3	5	4	3	3	5	3	5	3	4	3	3	5	4	5	4	3	1	2	2	1	4	2	2	2	1	2	2
2	1	1	4	3	2	1	182	60	2	1	2	1	1	1	1	2	1	2	2	2	2	1	2	2	2	2	2	4	3	5	4	4	4	4	4	5	4	5	5
2	2	1	2	4	2	2	167	57	2	2	3	1	2	2	1	2	1	2	1	3	1	2	1	2	2	2	2	4	4	4	4	3	5	3	4	3	5	5	3
2	1	1	5	1	1	1	181	76	3	3	2	2	2	1	3	2	1	3	1	1	1	3	2	2	2	1	3	4	3	5	5	5	5	3	5	3	4	5	5
2	1	1	4	2	2	1	176	48	2	1	1	2	1	2	1	2	1	2	1	2	2	2	2	2	1	3	1	5	5	5	4	4	3	4	3	5	3	4	4
2	2	2	1	1	2	1	165	53	5	5	3	4	4	5	5	4	3	5	3	3	3	4	3	3	4	4	3	1	2	3	2	1	4	1	3	1	1	2	2
1	1	2	2	4	1	3	160	53	4	3	3	3	4	4	4	3	5	3	5	3	5	5	5	4	4	5	5	2	4	2	1	1	1	3	3	3	3	3	2
1	2	2	3	1	2	3	178	69	2	2	2	1	3	3	1	1	2	2	1	1	2	3	3	2	2	1	1	4	3	5	5	5	5	3	5	3	4	4	5
2	2	2	1	1	2	2	171	64	2	2	2	2	3	2	2	2	2	3	1	2	2	2	2	2	2	2	1	5	4	3	4	4	3	5	5	5	4	3	5
2	2	1	5	4	1	1	173	55	1	3	2	2	1	1	3	3	1	2	1	2	1	3	1	3	1	1	2	4	4	4	4	3	4	5	5	5	3	4	4
2	2	1	5	4	1	3	162	67	1	1	1	1	2	2	1	3	2	2	1	2	1	1	4	3	5	4	3	4	4	3	4	5	4	5	3	3	5	5	4
1	2	1	3	1	2	2	158	76	3	3	1	2	1	2	1	1	1	1	2	2	1	3	2	1	2	1	2	4	4	4	4	3	3	4	5	4	5	3	4
2	1	2	4	3	2	4	169	76	4	3	4	4	3	4	5	3	4	4	3	4	3	2	2	1	1	2	2	4	5	4	4	5	3	5	4	3	3	4	4
2	2	2	5	2	2	2	160	63	2	3	1	2	3	1	1	2	1	2	2	1	3	3	2	1	2	1	2	4	3	5	5	5	5	4	4	4	5	4	5
1	1	2	5	1	2	1	157	73	3	3	2	1	1	1	1	3	2	2	3	3	2	2	1	1	2	3	2	5	3	3	3	5	4	4	4	4	2	3	2
1	2	2	3	1	2	4	176	52	2	2	3	3	2	3	1	1	1	1	3	2	2	2	2	1	3	2	2	4	5	5	3	5	3	5	5	5	4	5	3
1	2	1	5	3	2	1	168	75	2	3	2	1	1	2	2	3	1	2	2	2	2	3	2	1	2	2	2	3	3	5	4	5	3	5	4	3	3	1	2
1	1	2	1	2	2	2	176	74	2	3	3	3	1	2	1	2	2	1	2	2	2	3	1	1	2	1	2	5	4	3	5	5	5	4	3	4	4	5	4
1	2	2	1	4	1	3	160	49	1	1	2	3	2	2	2	2	2	2	2	2	2	1	2	2	2	2	1	5	4	4	5	4	4	5	5	5	4	4	5
2	1	1	5	1	2	3	168	46	3	3	3	5	2	5	3	3	5	5	5	5	5	4	4	5	3	2	4	2	1	3	2	1	2	1	1	2	1	2	3
1	2	2	3	3	2	1	176	62	2	1	3	1	2	3	1	2	2	2	2	3	2	1	3	2	2	2	2	5	4	5	5	4	4	4	4	4	3	5	3
1	2	2	1	1	2	3	166	67	3	3	5	4	4	3	4	5	3	5	5	3	4	4	1	2	3	2	2	3	4	4	3	5	3	4	5	4	4	3	4
1	2	1	5	2	2	1	163	59	1	1	1	2	1	2	1	3	2	2	3	3	1	2	2	3	2	1	2	5	4	4	4	4	4	4	3	4	4	4	5
2	2	2	5	3	2	3	177	63	2	1	3	2	2	2	2	2	1	2	2	3	2	2	1	3	2	1	3	3	4	4	3	5	3	4	5	4	5	3	4
2	1	1	2	1	2	3	181	64	2	3	2	1	2	3	3	2	2	1	3	1	2	2	3	4	4	5	4	3	3	3	3	1	2	3	2	1	4	4	5
2	1	2	3	1	2	3	181	58	3	3	5	4	4	4	3	4	3	4	4	4	4	5	5	5	3	3	3	4	5	5	3	4	4	5	5	4	3	4	4
1	2	1	2	1	2	5	178	46	2	3	1	2	3	1	1	2	1	2	2	1	3	3	2	2	2	3	1	5	3	4	4	5	4	3	3	4	4	5	5
2	2	1	5	2	1	2	162	54	1	2	1	1	2	2	2	2	1	3	2	2	1	2	2	2	2	1	2	5	5	4	5	4	5	4	5	4	4	4	4
1	2	1	1	2	1	5	179	52	3	3	1	1	2	2	1	1	1	2	1	2	2	1	2	2	1	2	3	4	3	5	4	4	4	4	4	5	4	3	5
2	2	1	1	5	2	3	176	72	2	2	2	1	3	1	1	2	2	1	1	2	2	2	2	2	1	2	3	5	5	4	4	4	4	4	4	4	3	4	5
2	2	2	5	4	2	5	178	47	3	3	1	2	1	2	1	1	1	1	2	2	1	3	2	2	1	2	3	1	3	3	3	1	1	3	3	2	4	5	3
1	1	1	4	4	1	3	177	74	2	1	1	2	2	1	2	1	2	3	1	3	3	2	1	1	2	2	2	4	5	4	4	5	5	4	5	3	5	4	5
1	1	1	4	5	2	1	174	72	2	2	3	3	2	3	1	1	1	1	3	2	2	2	2	2	2	1	3	4	3	4	5	4	4	3	4	4	5	4	4
1	1	1	3	3	2	2	165	67	5	3	4	5	5	3	5	3	5	4	5	4	3	5	4	5	2	5	2	5	3	5	4	4	4	3	4	5	2	2	1
1	2	2	1	1	1	2	166	66	3	5	4	4	5	3	5	2	4	5	5	4	3	4	5	2	4	3	3	1	1	1	2	1	2	3	3	1	3	2	3
1	2	1	5	1	2	3	167	70	2	3	3	2	2	2	2	2	2	3	3	3	3	1	3	2	1	2	3	5	5	5	3	3	5	5	3	4	4	4	4
2	1	2	5	1	2	4	169	70	2	1	3	1	2	2	2	1	2	1	2	1	2	1	2	1	1	3	2	4	3	3	4	4	5	4	3	3	4	4	4
1	1	1	5	3	2	3	172	61	2	2	3	2	1	2	2	2	3	1	2	3	1	2	2	3	3	2	3	3	4	5	3	5	4	3	4	4	1	1	2
1	1	2	2	1	1	1	180	51	2	1	2	2	3	2	2	1	1	3	2	1	2	1	5	2	4	3	3	5	5	3	4	4	3	4	5	4	5	5	4
2	1	2	3	3	1	5	172	69	1	2	2	1	2	1	3	2	3	2	2	2	3	2	3	1	1	1	3	4	3	4	5	3	5	5	4	5	4	3	4
1	2	2	2	3	1	5	159	58	4	3	2	5	4	2	4	5	3	3	2	3	4	4	1	2	2	2	2	5	5	5	5	4	4	5	3	5	4	3	4
1	2	1	2	1	2	2	166	76	2	1	1	3	3	3	3	1	3	1	3	1	2	2	2	2	1	1	2	5	5	5	4	4	4	4	5	3	4	4	3
2	2	1	3	3	2	5	170	47	2	1	3	1	3	2	1	1	1	1	2	2	2	2	2	2	1	3	1	4	4	3	5	5	4	4	4	4	4	3	3
2	1	1	5	2	1	3	178	69	2	3	3	2	2	2	2	2	2	3	3	3	3	1	4	5	3	3	3	3	4	4	4	3	5	4	4	3	4	3	5
1	1	1	1	1	2	2	168	68	2	1	3	2	2	2	2	2	1	2	2	3	2	2	2	2	2	1	3	3	4	4	3	5	3	4	5	4	5	5	5
1	2	1	4	4	2	3	182	46	2	2	2	2	3	2	3	2	2	2	2	2	2	2	1	2	1	3	1	3	4	3	5	4	4	4	4	4	5	4	3
2	1	1	2	3	2	3	164	62	1	1	2	3	3	1	1	1	1	1	2	1	1	1	1	1	2	3	3	5	4	5	4	5	5	5	5	5	5	4	4
2	2	1	2	3	1	4	181	67	5	3	4	5	4	3	4	5	4	3	3	3	5	5	2	1	2	2	2	4	4	5	5	4	4	5	4	5	4	5	5
1	1	2	2	4	2	5	169	66	2	2	3	2	1	2	2	2	3	1	2	3	1	2	3	2	1	2	2	5	3	4	4	5	4	3	3	4	3	5	3
2	2	1	1	4	2	2	169	54	2	2	2	1	2	1	2	2	3	3	1	2	2	1	4	2	5	4	4	5	5	5	5	4	5	5	3	5	2	1	3
1	1	1	1	3	1	4	163	53	4	5	3	4	5	5	3	4	4	5	4	3	4	3	2	1	1	2	2	5	3	4	4	5	4	3	3	4	4	4	4
1	1	1	4	6	1	1	163	75	2	2	1	3	1	1	3	3	1	1	1	1	1	2	2	2	1	1	3	4	5	4	3	3	5	3	5	5	5	4	4
1	2	1	1	3	2	2	168	61	3	3	2	1	2	2	1	1	2	2	2	1	1	1	2	3	2	1	2	5	4	5	4	4	5	4	4	4	3	5	4
2	1	1	2	6	1	3	167	58	3	2	2	1	2	2	2	3	2	3	1	2	2	3	2	2	2	2	3	4	3	4	3	4	4	3	4	3	5	4	5
2	2	2	5	3	1	3	181	74	2	2	2	2	1	1	2	1	1	2	3	3	1	2	1	1	1	2	2	4	4	4	4	3	5	3	4	3	4	4	4
2	2	1	5	4	1	3	167	60	5	5	3	4	2	4	5	4	5	5	2	4	3	3	1	1	2	2	2	4	3	4	3	5	4	3	4	3	5	5	5
2	2	2	2	4	2	5	169	50	1	1	2	1	3	2	2	1	1	3	1	2	2	1	3	2	1	2	2	4	4	3	5	5	4	4	4	4	4	4	5
2	2	2	1	4	2	3	159	67	4	5	4	4	5	4	4	3	3	4	3	4	5	4	4	5	4	3	3	2	1	2	3	1	1	1	1	1	4	3	1
2	2	1	2	1	2	1	169	56	2	3	1	1	2	3	2	2	3	2	1	1	2	2	3	3	3	4	4	4	4	4	4	5	4	4	4	4	4	4	4
2	1	1	4	3	2	2	167	65	3	1	3	2	2	1	2	1	3	3	3	2	2	2	2	2	1	1	2	4	4	4	5	5	5	5	4	4	4	4	5
1	1	1	3	4	1	3	173	70	1	2	3	2	3	1	2	2	1	3	2	2	1	3	3	1	2	2	2	3	5	4	5	3	5	5	4	4	5	4	3
1	2	1	5	1	1	1	160	63	1	1	2	2	1	2	2	1	1	1	2	3	1	3	3	2	1	2	1	5	3	4	3	5	5	3	3	5	2	2	1
2	1	2	3	2	1	4	182	60	1	1	3	1	3	2	2	2	2	1	2	2	2	3	2	2	2	1	1	2	1	1	1	1	2	3	3	1	5	4	5
2	2	1	4	2	1	4	181	65	2	4	3	4	3	3	4	4	3	2	3	2	5	5	5	5	4	4	5	5	5	5	4	5	5	5	5	4	3	4	5
1	2	1	5	2	2	3	163	50	2	1	2	1	3	1	1	1	3	1	3	1	2	3	2	1	2	1	2	5	3	4	3	5	5	3	3	5	5	4	4
2	1	2	5	3	2	2	177	70	1	1	2	3	2	2	2	2	2	2	2	2	2	1	1	2	1	1	2	4	4	4	4	3	4	5	5	5	4	5	4
1	1	2	1	5	1	3	179	70	1	1	2	1	2	2	1	2	2	2	3	2	2	2	3	2	2	1	1	5	5	5	5	5	5	3	4	5	4	5	3
2	2	1	5	2	2	1	177	59	1	1	2	2	2	3	1	2	2	3	2	2	1	3	1	2	3	2	2	5	4	4	4	5	5	4	5	4	3	5	4
2	2	2	2	3	1	3	175	61	4	2	4	4	4	3	4	3	5	4	3	4	3	4	3	2	1	1	1	4	4	4	4	3	4	5	5	5	4	3	4
1	1	2	5	5	2	2	172	58	2	1	2	1	3	2	1	3	2	2	1	2	2	1	3	3	4	4	4	5	4	5	4	4	5	4	4	4	3	4	3
1	2	1	4	3	2	3	180	69	3	3	2	1	2	2	1	1	2	2	2	1	1	1	3	2	2	2	2	3	3	5	4	5	3	5	4	3	5	4	5
1	2	1	1	5	1	2	176	55	5	4	4	5	4	3	5	4	2	5	3	5	3	5	4	3	4	5	5	1	1	2	1	3	3	2	4	1	2	1	1
1	1	2	5	4	1	3	162	54	2	2	2	3	1	3	1	2	2	1	1	2	2	2	2	3	2	2	2	5	5	5	5	4	5	4	4	4	4	5	4
1	2	2	1	4	2	2	161	66	1	2	1	3	2	1	3	2	1	2	1	2	2	1	1	2	2	1	1	3	5	5	4	4	4	4	5	4	4	5	4
1	2	2	5	3	2	1	161	71	2	2	1	2	3	2	3	2	1	1	2	2	2	3	1	3	2	2	3	4	5	4	4	4	4	5	3	5	4	5	5
2	1	1	2	4	2	3	162	72	2	3	2	1	2	1	2	2	3	2	3	2	2	2	3	3	4	4	5	5	3	4	3	5	5	3	3	5	2	2	1
2	2	2	5	5	2	4	158	62	2	3	2	1	1	2	2	3	1	2	2	2	2	3	3	1	1	2	3	5	3	5	4	4	4	3	4	5	4	4	4
1	2	1	1	1	2	3	171	46	2	2	3	2	2	2	2	2	2	1	1	2	1	2	4	2	5	4	4	2	1	2	2	3	2	2	1	3	1	3	3
2	1	1	5	2	2	2	162	76	2	2	3	2	1	2	2	1	1	2	2	3	3	2	2	2	1	1	1	5	4	4	4	5	4	5	5	3	5	3	5
1	2	1	3	2	2	3	180	48	1	2	1	3	2	2	1	2	2	1	1	1	1	2	3	2	1	2	3	2	1	2	2	3	3	1	1	1	5	4	4
1	2	1	3	1	2	3	158	49	2	2	2	3	2	3	2	3	1	2	3	2	2	1	2	2	1	2	3	5	3	5	5	5	5	4	4	4	4	5	4
1	2	2	1	4	1	3	178	52	3	2	1	2	1	1	2	3	2	2	1	1	2	1	2	2	2	3	3	3	3	5	4	5	4	4	4	4	3	4	3
1	1	1	4	3	2	3	177	56	1	3	2	3	2	1	1	2	2	1	1	2	1	2	1	1	1	2	2	5	4	4	5	5	3	5	5	5	3	5	3
1	1	2	3	6	1	3	158	58	3	5	4	5	3	5	3	4	3	2	5	5	3	3	1	2	2	1	2	1	2	2	2	3	1	3	1	1	4	5	4
1	2	1	3	4	2	3	163	73	1	1	2	2	1	2	2	1	1	1	2	3	1	3	3	1	2	2	2	4	3	4	5	5	5	4	5	4	3	5	3
2	1	2	3	1	2	3	170	47	1	3	3	1	3	2	2	1	1	2	1	3	2	1	2	2	2	3	3	5	4	5	5	4	4	4	4	4	4	4	4
1	2	1	4	4	1	5	160	49	2	1	1	2	2	1	2	2	1	2	1	3	2	2	3	2	5	3	5	5	3	5	4	4	4	4	3	4	4	5	4
2	2	1	5	1	2	1	179	70	1	1	2	2	1	3	1	2	2	1	2	1	2	3	1	2	1	2	3	5	4	3	5	5	5	4	3	4	4	4	4
2	2	1	5	3	2	3	176	52	1	2	3	2	1	2	2	1	1	1	3	2	2	2	2	2	2	1	2	5	5	4	4	5	5	4	4	3	5	5	4
1	1	1	3	2	2	2	182	56	3	1	1	1	2	3	1	1	1	1	1	2	2	2	2	2	2	2	3	4	4	5	4	3	4	3	4	4	5	5	4
2	2	1	5	2	2	2	161	64	1	3	1	1	2	2	1	2	2	2	2	2	2	1	3	1	2	2	2	4	5	4	5	3	3	3	5	5	5	4	3
1	2	1	2	5	2	1	167	75	5	5	3	5	5	2	5	3	4	4	4	2	4	3	3	3	3	3	3	2	3	1	3	3	2	2	1	3	2	1	1
2	1	1	5	2	2	1	169	74	1	1	2	1	3	2	2	1	1	3	1	2	2	1	1	3	2	2	1	3	5	4	4	4	5	5	3	5	5	5	4
1	2	1	3	3	1	4	167	63	5	5	3	5	5	3	4	4	4	4	2	2	4	5	2	2	2	1	3	5	3	4	4	3	4	5	3	5	3	4	4
2	1	1	4	1	1	3	172	51	1	1	3	2	1	2	1	3	1	3	1	1	2	2	1	1	1	2	1	4	4	3	3	5	4	3	4	4	4	5	5
1	1	1	5	4	2	4	159	47	1	1	3	2	2	1	2	2	2	2	1	2	2	1	2	2	2	2	3	4	3	4	4	5	5	4	3	5	5	5	3
2	2	2	4	4	1	2	167	56	2	2	2	1	3	1	1	2	2	1	1	2	2	2	2	2	1	2	3	4	3	5	5	5	4	4	4	5	3	5	4
2	1	2	1	1	2	3	161	55	1	2	2	1	2	3	2	2	2	1	2	2	2	1	5	5	3	2	5	5	4	4	5	4	5	5	4	4	3	3	5
2	1	2	5	4	2	2	171	53	2	1	2	2	2	1	1	2	2	2	2	2	2	2	5	4	4	4	5	3	4	4	4	4	4	5	5	5	3	4	4
1	1	2	4	1	2	1	160	60	3	4	4	3	5	5	3	4	4	5	5	4	5	5	5	2	5	3	4	5	4	5	5	5	4	5	3	5	5	5	4
2	2	2	5	2	1	3	170	46	1	1	1	1	2	1	2	2	3	3	2	1	2	3	2	1	2	2	2	3	5	4	3	4	4	3	5	5	1	1	1
2	2	1	5	3	2	2	162	74	2	3	1	2	2	3	2	2	2	3	3	1	3	2	2	3	2	2	1	5	5	5	5	4	5	5	3	5	5	5	5
1	2	2	2	2	2	4	176	53	2	2	2	1	1	1	2	1	2	2	3	2	2	1	2	2	3	3	2	3	3	5	3	5	3	4	5	4	4	5	3
2	1	2	2	1	1	5	177	60	2	3	2	2	2	3	2	3	2	1	2	1	1	2	2	3	1	2	1	5	5	5	5	4	5	4	4	4	5	4	4
2	1	1	3	3	2	1	173	58	2	3	1	1	1	1	3	3	1	3	3	2	2	2	2	2	2	2	1	5	4	4	4	4	3	4	4	4	4	5	4
2	2	1	3	1	1	1	164	56	2	3	2	2	1	2	2	3	2	2	1	1	3	1	2	1	3	1	2	3	5	4	5	3	5	5	4	4	4	4	4
2	2	2	3	2	2	5	159	49	4	3	5	5	4	4	3	4	2	5	5	4	2	3	5	4	5	5	4	3	1	3	3	2	1	2	2	3	2	2	2
2	1	1	5	1	1	4	160	65	5	5	5	4	4	3	4	5	5	3	4	4	4	5	4	4	5	3	4	5	3	4	3	5	5	3	3	5	5	5	4
2	1	1	3	2	2	3	180	63	4	2	3	3	3	4	4	5	5	4	5	5	3	5	1	3	1	3	1	4	5	5	5	4	3	4	4	4	5	3	4
2	1	2	4	4	2	5	177	56	3	3	1	1	2	3	3	1	2	2	2	3	1	1	1	1	3	2	2	2	3	1	3	3	2	2	1	3	5	4	4
1	2	1	3	1	2	4	162	67	2	1	2	2	3	1	2	3	1	1	2	2	1	2	1	3	3	1	3	4	5	3	5	4	4	5	5	3	4	5	5
1	2	2	5	2	1	2	158	53	2	2	1	2	3	2	2	2	1	1	1	1	1	2	1	1	1	1	1	4	5	4	4	4	4	4	4	4	4	4	5
1	2	2	5	2	1	3	160	69	3	3	1	1	2	2	1	1	1	2	1	2	2	1	1	2	2	2	1	3	4	5	4	5	5	5	5	5	5	3	3
2	2	1	5	1	2	4	173	54	2	2	2	1	3	1	1	3	3	3	3	2	2	1	4	5	3	3	3	3	4	3	5	4	4	5	4	5	5	3	3
1	2	2	3	5	2	2	177	76	3	3	2	2	2	1	3	2	1	3	1	1	1	3	1	2	2	2	1	5	4	3	4	5	4	5	4	5	4	3	3
2	2	1	2	1	2	1	172	67	2	3	2	1	2	3	3	2	2	1	3	1	2	2	2	2	2	1	1	4	2	2	3	3	1	1	2	3	5	4	4
1	1	2	1	2	2	3	178	57	1	1	1	2	1	2	1	3	2	2	3	3	1	2	5	4	3	4	5	3	3	3	3	2	3	2	2	1	2	1	3
1	2	1	1	1	2	1	161	57	1	1	2	1	2	2	1	2	2	2	3	2	2	2	2	2	2	1	2	5	5	5	5	4	4	5	3	5	5	3	4
1	2	2	1	2	1	4	170	58	3	5	3	3	2	3	5	4	4	5	3	3	5	3	4	4	4	4	4	3	3	1	2	3	1	3	3	3	4	4	3
2	2	1	3	4	1	1	159	69	2	2	1	1	2	2	2	2	2	1	2	3	3	2	5	3	5	3	5	4	3	5	5	5	4	4	4	5	4	5	4
1	2	2	2	1	2	3	159	60	3	3	4	5	3	3	4	4	4	4	4	3	4	4	2	2	2	3	3	4	5	5	3	3	5	4	5	5	3	5	3
2	1	2	5	3	1	3	178	71	5	3	5	3	2	5	4	5	3	4	4	4	3	5	3	2	2	2	3	5	4	4	4	4	4	4	4	3	4	4	5
1	2	2	2	4	2	3	182	57	5	5	3	4	4	5	5	4	3	5	3	3	3	4	1	2	2	1	2	5	3	4	3	5	5	3	3	5	4	4	5
2	1	1	2	2	2	3	157	46	5	3	3	2	3	4	4	4	4	4	5	5	5	5	1	3	2	2	1	2	3	2	3	1	1	1	2	1	2	2	1
2	1	1	2	1	1	5	173	53	5	5	3	5	3	3	4	3	4	5	5	3	4	4	4	3	3	4	4	2	2	2	2	1	2	3	3	3	2	1	3
1	2	1	5	1	2	5	175	63	3	3	4	5	2	4	5	3	5	5	4	4	3	5	5	4	4	4	4	5	5	3	3	5	4	4	5	5	1	1	2
2	2	1	2	3	1	3	175	57	3	3	1	1	2	3	3	1	2	2	2	3	1	1	1	3	2	2	1	4	3	4	4	5	5	5	3	4	3	4	5
2	2	2	2	2	1	5	167	61	3	4	3	4	3	3	5	5	4	3	3	3	2	3	4	5	5	3	3	3	3	3	1	3	3	2	2	2	3	2	3
2	1	1	5	3	1	4	167	67	3	1	1	3	1	3	3	2	1	2	2	3	3	1	2	3	2	1	2	4	5	3	5	4	3	5	5	4	4	4	4
1	2	1	4	4	2	5	168	69	2	2	1	2	3	2	2	2	1	1	1	1	1	2	2	1	3	2	2	4	4	5	3	4	4	5	4	4	5	5	4
1	1	2	4	1	1	3	175	61	4	5	4	5	3	3	5	3	5	5	5	4	4	4	1	3	1	3	1	3	4	4	4	4	3	5	5	3	2	2	3
2	2	1	1	1	1	3	169	73	2	2	1	3	1	1	2	2	2	2	2	2	2	1	2	2	2	2	3	5	4	5	5	4	5	4	3	4	3	4	4
2	1	1	1	3	1	3	171	55	3	4	3	3	2	3	5	4	5	5	4	4	4	5	1	2	3	2	2	5	4	3	4	4	3	5	5	5	4	4	4
2	2	1	3	4	1	3	162	67	2	2	3	3	2	3	1	1	1	1	3	2	2	2	2	1	2	2	1	3	3	4	4	5	4	5	5	4	4	4	4
2	1	1	3	3	2	2	163	52	2	1	1	2	2	1	2	1	2	3	1	3	3	2	1	1	1	2	2	4	5	3	5	4	3	5	5	4	4	4	4
1	2	2	3	2	2	2	174	58	2	2	1	2	3	2	2	2	1	1	1	1	1	2	3	2	2	3	2	4	4	4	4	3	3	4	5	4	4	3	4
2	1	2	4	2	1	3	177	55	3	2	1	2	3	2	3	3	1	2	1	2	2	1	5	5	5	5	4	4	4	4	5	5	5	5	4	4	4	3	4
1	2	1	5	3	2	5	165	66	1	1	2	3	3	1	1	1	1	1	2	1	1	1	1	1	2	3	3	5	4	4	4	3	4	5	5	5	3	4	5
1	2	2	2	1	1	3	159	62	2	1	1	2	1	2	2	3	3	1	3	2	1	2	2	3	2	2	2	4	5	5	3	5	3	5	5	5	4	5	4
2	2	2	4	1	2	3	175	64	3	2	1	2	1	3	1	2	2	2	2	3	2	2	3	1	1	1	3	3	4	4	4	5	4	4	5	3	5	3	4
2	1	2	3	2	1	3	159	46	2	2	3	2	1	2	2	1	1	2	2	3	3	2	2	2	3	2	2	3	5	4	3	4	4	3	5	5	5	4	3
1	2	1	5	4	2	4	178	52	2	2	2	2	2	2	2	2	1	2	2	2	1	1	2	3	2	1	2	4	5	4	5	3	3	3	5	5	1	3	1
2	2	2	2	1	2	1	161	52	2	2	2	1	1	3	1	1	2	1	2	1	3	2	3	2	1	2	1	3	4	4	3	4	5	5	5	4	5	4	4
1	1	1	1	5	1	3	180	68	2	2	2	3	1	2	2	3	3	2	2	2	2	2	5	4	4	5	4	4	3	5	4	5	4	3	5	3	3	4	4
1	2	2	1	4	2	4	159	57	1	1	3	1	3	2	2	2	2	1	2	2	2	3	1	3	3	3	2	4	4	3	5	3	4	3	4	4	5	4	5
1	2	2	5	3	1	3	159	46	3	3	4	5	3	4	5	3	5	3	3	5	4	4	1	1	2	3	1	4	4	3	3	5	4	3	4	4	4	4	4
1	1	1	5	4	2	3	167	70	4	5	3	4	5	5	3	4	4	5	4	3	4	3	3	2	3	3	2	4	5	5	5	5	5	4	4	5	4	5	4
2	2	1	2	1	1	2	174	61	3	4	3	3	4	4	4	4	2	5	5	3	4	3	1	2	1	2	3	4	4	4	3	4	3	5	5	4	5	5	3
1	1	2	4	2	1	2	172	52	2	1	2	2	3	2	2	1	1	3	2	1	2	1	4	3	4	5	5	4	5	4	4	4	4	5	3	5	4	5	4
2	2	1	3	4	2	3	165	69	2	2	1	2	3	2	1	3	2	2	2	2	1	3	2	1	2	2	3	3	4	4	5	3	5	3	4	3	4	4	4
1	1	2	3	4	1	1	173	47	2	2	1	3	3	2	2	2	1	2	2	2	1	2	1	3	3	2	3	4	5	5	3	4	4	5	5	4	4	5	3
2	1	2	4	4	2	3	157	65	2	2	1	2	3	1	2	1	2	1	2	2	1	2	2	2	2	1	2	5	3	4	4	5	4	4	5	3	4	3	5
2	2	2	3	3	2	2	166	59	5	5	4	3	3	5	3	3	3	3	5	5	5	5	1	3	2	2	1	5	4	5	5	5	4	3	3	4	5	5	4
1	2	1	5	1	1	3	181	54	3	3	4	3	4	3	5	4	4	5	4	4	3	3	2	4	4	3	4	3	3	1	2	2	2	1	1	2	2	1	2
2	2	1	4	4	1	1	180	47	1	1	2	3	3	1	1	2	2	2	1	1	2	2	3	2	2	2	2	1	3	1	3	3	2	2	1	1	3	4	3
2	2	2	2	3	2	4	173	62	2	2	2	2	3	2	2	2	3	2	3	2	2	2	2	2	1	1	1	4	5	4	3	3	5	3	5	5	3	5	5
1	2	2	5	4	2	1	166	64	3	2	1	1	1	1	3	2	1	3	2	3	2	2	1	1	1	2	1	3	4	5	5	3	4	3	5	4	5	5	4
2	2	1	4	4	2	4	176	68	1	1	2	2	1	1	2	1	2	2	1	2	2	1	2	3	2	2	2	2	1	2	3	3	2	1	3	2	4	5	4
1	1	2	2	1	2	2	180	47	1	3	2	3	2	1	1	2	2	1	1	2	1	2	2	2	2	2	3	3	2	1	3	2	1	1	3	2	4	4	4
1	2	1	3	2	2	2	171	63	2	1	3	1	2	2	2	1	2	1	2	1	2	1	3	1	1	2	1	5	4	4	4	4	4	4	3	4	5	4	4
1	2	1	2	1	2	2	171	47	2	3	3	2	2	2	1	2	2	3	2	1	1	1	3	1	1	1	3	3	4	5	4	5	4	5	5	4	4	5	3
1	2	2	1	2	2	1	182	64	1	3	3	2	2	2	1	1	3	3	2	1	3	2	2	1	3	2	2	3	4	3	4	5	3	5	5	5	4	4	5
2	2	2	5	3	2	1	167	74	1	3	2	3	2	2	2	2	2	1	1	1	2	2	1	2	2	2	2	5	4	5	5	4	5	4	3	4	5	3	4
2	1	1	2	3	2	3	158	72	5	4	3	3	4	4	2	2	4	3	4	3	4	4	4	3	5	3	3	2	1	1	1	1	2	1	4	1	2	2	2
2	2	2	5	1	2	1	177	55	2	2	1	2	3	1	2	1	2	1	1	2	3	1	1	2	2	2	2	5	4	4	5	5	3	5	5	5	4	4	4
1	1	1	1	1	1	3	182	74	2	1	3	2	2	3	2	2	2	3	1	1	1	2	3	1	2	2	2	3	5	3	5	3	4	4	4	4	1	3	2
1	1	2	2	1	1	4	173	66	4	3	4	5	4	3	4	3	5	5	3	4	4	3	4	3	4	5	3	5	3	5	4	4	4	5	4	5	3	3	2
2	2	2	5	2	1	3	164	61	2	1	2	2	3	2	2	2	2	2	2	3	2	2	3	5	3	4	4	3	1	2	3	1	1	1	3	4	3	4	2
1	1	1	5	5	2	2	157	51	2	2	3	2	2	1	2	1	2	2	1	1	1	2	4	3	4	5	3	4	5	5	4	4	3	4	5	3	5	4	4
2	2	1	2	5	2	2	178	49	2	1	1	3	2	1	2	1	2	1	3	1	2	1	2	3	3	2	3	3	5	4	5	5	4	5	4	4	4	5	5
2	2	2	1	4	2	4	167	49	3	1	1	3	1	3	3	2	1	2	2	3	3	1	3	2	2	1	1	5	3	4	3	5	4	3	5	3	3	4	4
2	2	1	2	3	2	2	164	71	1	1	2	3	3	1	1	2	2	2	1	1	2	2	2	2	1	1	2	5	5	5	5	4	4	5	3	5	5	5	4
2	1	2	4	1	2	3	171	75	5	5	5	5	5	4	4	5	4	4	3	4	3	4	3	5	5	5	3	1	3	1	1	3	1	1	2	1	4	2	3
1	2	1	4	2	1	5	176	63	2	2	2	1	2	1	2	2	1	1	2	2	2	3	2	2	3	2	1	4	3	4	2	2	1	3	3	3	5	4	5
1	2	1	2	1	1	3	178	74	2	3	1	2	1	3	2	2	2	1	2	3	2	2	3	1	2	1	2	3	4	4	4	4	5	4	3	5	3	4	4
1	1	2	2	2	2	2	167	57	1	3	3	2	1	2	3	1	2	3	2	1	1	1	3	5	4	4	5	4	5	5	5	4	5	4	5	4	4	4	5
1	2	2	3	3	1	4	166	52	2	2	1	1	2	2	2	2	2	1	2	3	3	2	4	3	3	3	4	5	4	5	5	4	4	3	5	4	4	5	3
2	1	1	4	2	2	5	177	53	5	4	3	5	3	5	3	3	5	5	3	3	4	3	3	4	4	5	4	3	2	2	1	2	2	2	1	1	1	3	1
1	2	2	2	3	2	3	176	75	1	1	3	1	3	2	2	2	2	1	2	2	2	3	4	5	2	5	4	4	5	5	4	4	5	5	4	5	5	5	4
1	1	1	4	4	1	2	162	74	2	2	1	1	1	2	1	3	1	2	1	2	2	2	3	2	1	2	2	5	4	3	5	5	5	4	3	4	1	3	3
2	2	1	2	3	2	4	180	54	3	1	2	1	3	1	3	3	3	2	2	3	3	2	2	2	1	2	3	3	3	4	4	5	4	5	5	4	4	4	4
2	1	1	1	3	1	2	174	68	2	1	1	1	2	1	2	2	1	3	3	1	1	2	3	2	3	2	2	4	4	4	4	5	4	5	4	5	3	1	3
1	2	1	3	2	1	2	171	52	3	2	1	2	1	3	1	2	2	2	2	3	2	2	2	3	1	2	2	5	5	5	5	4	4	5	3	5	4	4	5
1	2	1	3	5	2	3	161	57	2	3	1	1	2	3	2	2	3	2	1	1	2	2	2	1	2	3	2	4	5	5	4	4	3	4	5	3	4	4	5
1	2	1	5	1	2	2	170	69	1	3	1	2	1	1	1	2	2	1	3	2	3	3	1	1	1	2	1	3	5	4	3	4	4	4	4	3	3	3	4
1	2	1	2	2	2	2	180	47	1	1	2	2	2	3	1	2	2	3	2	2	1	3	5	5	4	5	4	4	5	4	4	4	4	4	4	4	5	5	3
1	2	2	3	6	2	3	180	60	4	5	4	5	5	4	5	3	3	3	5	5	3	4	2	2	1	1	2	4	5	4	4	5	5	4	5	3	5	5	4
1	2	1	4	1	1	4	166	66	2	1	3	1	2	2	2	1	2	1	2	1	2	1	1	1	1	2	1	5	5	4	4	4	4	4	4	5	4	4	5
1	1	1	3	4	1	4	165	75	3	2	2	1	1	2	3	2	2	3	3	2	1	2	1	1	2	3	3	5	5	5	5	5	5	3	4	5	2	3	1
1	2	1	1	3	1	3	167	68	3	2	2	3	1	2	1	2	2	2	2	3	2	1	3	3	3	2	1	4	5	5	3	3	5	4	5	5	4	5	5
1	1	2	1	1	2	1	170	52	1	3	1	2	1	1	1	2	2	1	3	2	3	3	1	3	1	3	2	5	4	4	5	5	3	5	5	5	4	5	5
1	2	2	1	1	2	3	157	46	2	3	3	2	2	2	2	2	2	3	3	3	3	1	1	1	1	3	2	4	5	3	5	5	4	4	5	4	5	4	3
2	2	2	4	2	2	3	162	56	3	4	5	2	4	4	3	5	5	4	4	4	4	4	2	1	2	3	2	4	2	2	3	3	1	1	2	3	1	1	2
2	2	1	2	4	1	3	178	62	1	2	2	1	2	3	2	2	2	1	2	2	2	1	2	1	2	1	2	5	4	3	5	4	5	5	5	5	5	3	4
1	1	2	2	3	1	2	161	46	5	5	4	5	5	5	5	3	3	4	4	4	4	5	3	3	3	4	5	4	3	4	4	4	3	5	4	5	2	1	1
1	2	1	1	2	2	3	161	68	3	2	1	2	2	1	1	1	1	3	1	1	2	1	1	1	1	1	3	5	3	5	4	4	4	5	4	5	5	4	5
1	2	1	1	1	2	2	162	76	4	4	4	3	2	4	5	3	3	4	5	5	3	3	2	3	1	2	1	5	4	5	3	5	5	3	3	5	4	4	5
2	2	1	1	3	1	3	172	64	1	1	1	2	1	2	1	3	2	2	3	3	1	2	3	2	1	3	1	4	3	5	5	5	4	4	4	5	3	4	3
2	2	2	2	4	1	4	172	61	1	2	2	1	2	1	3	2	3	2	2	2	3	2	1	1	2	2	2	4	1	3	3	1	1	3	1	1	4	4	4
1	2	1	4	5	2	4	176	48	3	2	4	4	4	4	3	3	4	5	5	2	4	5	5	5	4	3	4	1	3	3	2	3	2	3	1	3	3	2	2
2	2	1	1	4	2	1	177	56	5	4	5	3	5	3	3	2	5	4	5	5	5	5	3	2	2	1	2	5	4	5	5	5	4	3	3	4	4	4	4
2	2	1	5	2	2	3	171	47	2	1	1	1	2	1	2	2	1	3	3	1	1	2	3	1	3	2	2	4	4	4	4	4	5	4	5	5	4	4	4
1	2	1	5	2	2	1	174	55	1	1	1	2	1	1	3	2	3	1	1	1	2	2	1	2	2	2	2	5	3	4	4	4	5	5	3	3	5	3	4
1	2	2	3	2	2	3	158	65	3	3	1	2	1	2	1	1	1	1	2	2	1	3	3	3	3	2	1	4	5	5	3	4	4	5	5	4	5	5	4
2	2	1	1	2	1	3	164	48	3	3	1	2	1	2	1	1	1	1	2	2	1	3	2	3	3	2	2	4	5	4	3	5	4	5	4	5	5	5	5
1	1	2	5	2	2	4	168	58	3	2	2	1	2	3	3	1	1	1	1	2	1	2	2	3	3	2	2	4	3	3	1	1	1	2	2	3	2	2	2
2	1	1	1	3	1	3	175	71	2	3	2	2	1	3	2	1	1	1	1	1	1	2	2	2	2	1	1	5	3	5	4	4	4	4	3	4	4	4	5
1	2	2	3	1	1	5	161	73	3	2	2	2	1	2	2	1	2	2	2	1	2	1	3	3	3	4	4	4	3	4	5	4	4	3	5	4	5	4	4
2	2	1	2	3	2	2	178	72	2	1	3	2	2	2	2	2	3	1	2	3	1	2	1	2	3	2	2	4	5	3	5	4	3	5	5	4	3	2	2
2	2	1	4	2	1	2	175	63	3	5	3	4	2	4	4	3	5	3	3	4	4	5	2	2	2	1	1	3	1	2	2	3	3	1	2	2	4	4	3
2	2	1	2	1	1	3	163	52	3	5	5	4	3	3	3	3	5	3	4	5	4	3	5	5	5	3	5	3	1	1	1	2	4	1	2	1	5	4	5
2	1	1	3	1	2	1	157	68	2	1	3	2	2	2	2	2	3	1	2	3	1	2	2	3	2	2	2	4	5	4	5	4	3	4	3	4	4	5	5
1	2	1	3	3	2	2	164	66	4	5	3	3	3	5	4	4	3	3	3	3	4	5	4	5	3	5	4	1	4	3	3	1	3	1	1	3	1	3	1
2	2	1	2	1	2	3	159	50	2	2	3	1	2	3	1	3	1	1	2	1	1	1	2	4	3	5	5	3	3	1	3	1	1	1	1	1	1	2	1
1	2	1	4	2	2	3	168	52	2	2	2	1	3	3	1	1	2	2	1	1	2	3	2	1	3	1	2	4	3	4	5	5	5	5	5	4	4	4	4
2	1	1	2	5	2	3	169	51	2	2	2	1	2	1	2	2	1	1	2	2	2	3	2	2	2	2	3	4	5	5	4	4	3	4	5	3	3	1	2
2	2	1	4	3	2	2	167	52	2	1	1	3	3	3	3	1	3	1	3	1	2	2	2	1	2	2	2	4	5	5	5	4	3	5	3	4	5	4	5
1	2	1	5	2	1	3	158	49	3	4	3	4	3	3	5	5	4	3	3	3	2	3	4	4	4	5	4	1	1	3	1	1	3	1	2	1	1	1	1
2	2	1	4	4	2	2	181	56	3	2	2	2	2	1	2	1	2	1	2	1	3	1	2	1	1	1	1	4	3	4	5	3	4	5	5	4	1	3	3
1	1	2	4	3	2	5	176	54	2	1	2	2	2	1	2	2	3	3	2	2	1	2	2	2	2	2	2	3	2	1	3	2	1	1	3	2	2	1	3
1	2	1	5	5	1	4	182	73	2	1	3	2	1	3	1	1	1	2	1	1	3	1	1	2	3	2	3	3	5	4	5	3	5	5	4	4	5	5	4
1	2	1	4	4	2	2	180	68	4	3	3	3	4	4	4	3	5	3	5	3	5	5	4	4	4	4	4	1	1	2	1	1	2	3	4	1	5	5	4
1	2	2	4	1	2	2	166	62	1	1	3	1	3	2	1	3	2	2	2	3	3	1	1	2	1	2	3	3	1	3	3	2	1	3	3	1	5	4	4
1	2	2	3	1	2	1	180	61	2	2	1	3	1	1	2	2	2	3	2	2	2	2	3	3	2	2	2	4	3	5	5	5	5	3	5	3	5	4	5
1	1	1	4	3	1	4	166	69	2	2	2	2	3	2	2	2	3	2	3	2	2	2	1	2	3	2	2	4	3	5	4	4	4	4	4	5	5	4	3
2	1	1	1	2	2	3	160	62	3	4	5	2	4	4	3	5	5	4	4	4	4	4	4	4	5	3	4	2	1	2	3	3	2	1	3	2	1	3	1
1	2	1	1	5	2	2	158	68	1	2	3	2	1	2	2	1	1	1	3	2	2	2	2	1	2	3	1	3	2	1	3	2	1	1	3	2	4	4	5
1	2	1	2	2	2	2	159	73	5	4	3	5	3	5	3	3	5	5	3	3	4	3	3	3	3	4	4	5	5	4	4	4	4	4	4	4	4	4	5
2	2	2	3	1	2	4	163	75	3	2	1	2	3	2	3	3	1	2	1	2	2	1	3	2	1	2	3	4	4	4	5	3	4	4	3	5	1	1	2
2	2	1	4	2	2	2	162	65	1	3	3	1	3	2	2	1	1	2	1	3	2	1	1	2	3	2	3	4	4	4	4	5	3	4	3	4	5	4	3
1	1	1	2	2	1	3	175	61	1	1	1	2	1	1	2	2	2	1	2	2	2	1	2	2	1	2	2	4	5	3	4	4	5	4	5	5	5	5	4
2	1	1	4	4	1	3	175	76	2	2	2	1	2	1	2	2	3	3	1	2	2	1	1	2	2	2	2	5	4	5	5	5	4	3	3	4	4	4	5
1	2	1	4	4	2	2	179	66	5	4	5	3	3	3	4	2	5	5	4	3	4	3	4	4	5	3	3	1	1	3	2	1	1	3	1	3	3	1	2
2	2	1	4	3	2	3	168	50	2	1	2	2	3	2	2	2	2	2	2	3	2	2	5	5	5	4	5	5	4	3	5	4	5	5	5	5	5	4	5
2	2	2	1	3	1	3	164	70	1	2	1	3	2	1	3	2	1	2	1	2	2	1	3	2	1	2	3	5	3	5	4	4	4	3	4	5	4	5	5
1	2	1	2	2	2	1	171	65	1	2	2	1	2	1	3	2	3	2	2	2	3	2	1	1	1	2	2	4	3	4	5	5	5	5	5	4	4	4	5
2	2	2	3	3	2	2	175	52	2	2	2	1	2	1	2	2	3	3	1	2	2	1	5	2	5	3	5	4	4	4	4	3	4	5	5	5	5	5	5
2	2	1	5	2	1	2	172	49	3	3	1	1	2	3	3	1	2	2	2	3	1	1	3	1	1	2	1	5	5	4	4	5	5	4	4	3	4	4	4
1	2	2	5	2	2	1	157	65	2	3	2	3	2	2	1	1	2	1	2	2	2	1	2	2	2	3	3	4	4	5	5	4	5	4	4	5	4	5	5
2	1	1	5	3	2	5	165	72	1	2	2	2	2	2	2	2	3	1	2	1	1	2	2	2	3	1	2	4	4	3	4	5	4	5	3	3	4	4	4
1	1	1	1	1	1	2	174	69	2	1	1	2	1	2	2	3	3	1	3	2	1	2	2	1	1	2	2	3	5	4	3	4	4	3	5	5	4	5	3
2	1	1	4	2	2	3	173	60	1	3	1	2	2	1	2	1	3	2	2	2	1	1	2	2	1	2	3	4	5	3	4	4	5	4	5	5	5	5	5
2	2	1	4	4	1	1	167	69	2	1	2	2	2	2	3	1	3	2	2	1	2	1	1	1	2	1	2	4	4	4	4	5	4	4	4	4	5	5	3
2	2	2	4	1	1	2	166	75	2	1	2	2	2	1	3	3	2	2	2	1	2	2	2	2	1	3	1	3	4	5	5	4	3	4	5	4	5	4	3
1	1	2	2	4	2	4	162	75	1	1	1	2	1	1	2	2	2	1	2	2	2	1	2	2	2	2	3	4	4	5	5	4	5	4	4	5	4	4	4
2	1	1	3	4	1	3	166	62	1	2	3	1	3	1	1	1	2	2	2	3	1	1	2	2	3	2	2	4	3	5	5	5	5	3	5	3	4	4	3
2	2	2	2	4	2	1	158	47	2	3	3	2	2	2	2	2	2	3	3	3	3	1	3	1	1	3	2	5	5	4	5	4	4	5	3	5	4	4	5
1	1	2	1	3	1	3	160	74	2	2	2	2	3	2	3	2	2	2	2	2	2	2	4	4	4	5	4	3	4	5	4	5	5	5	5	5	4	5	5
1	2	2	2	1	1	3	181	50	2	2	2	3	1	1	2	2	2	2	2	1	2	1	4	4	5	5	5	4	4	3	3	4	4	5	4	4	4	4	5
1	1	1	4	2	2	2	177	56	2	1	3	2	2	2	2	2	3	1	2	3	1	2	5	4	3	4	5	4	5	5	5	4	3	5	3	4	4	4	3
2	2	1	3	1	1	2	169	49	2	1	2	3	3	2	1	2	2	1	1	2	1	3	1	1	2	2	2	5	4	4	5	4	5	5	4	4	3	4	3
2	2	2	4	1	2	3	161	67	4	3	3	5	5	5	3	3	5	5	3	4	4	5	4	5	3	2	4	4	4	4	3	4	3	5	5	4	2	2	2
2	1	1	2	3	2	1	161	54	2	1	3	1	2	1	2	3	2	2	2	2	1	2	1	3	2	1	3	5	5	5	4	4	5	3	3	5	5	3	4
1	2	2	4	1	2	3	181	59	5	4	5	4	4	2	5	3	4	4	5	4	3	3	2	2	2	1	1	4	4	4	3	4	5	5	5	5	4	3	4
1	2	2	1	2	1	3	172	74	5	5	5	3	4	3	3	2	3	3	3	5	3	4	1	1	2	3	1	4	5	5	5	5	5	5	4	4	3	4	4
2	1	1	4	4	2	3	157	76	1	1	3	3	3	2	3	2	1	2	1	2	2	2	2	1	1	1	3	3	4	5	4	5	4	5	5	4	5	4	5
1	2	1	4	2	2	3	180	63	2	2	2	3	1	1	2	2	2	2	2	1	2	1	1	2	2	2	1	4	5	4	4	4	4	5	3	5	1	1	2
1	1	1	5	4	1	2	168	58	1	1	2	2	1	2	2	1	1	1	2	3	1	3	4	3	4	3	2	4	5	5	4	4	5	5	4	5	5	5	4
1	1	1	4	3	2	3	159	54	1	1	1	1	2	1	2	2	3	3	2	1	2	3	1	2	2	2	1	3	5	5	3	4	3	5	3	4	5	4	4
2	2	2	5	3	2	2	158	61	2	2	1	3	1	2	2	2	2	2	2	2	1	2	1	2	1	2	1	2	2	3	4	2	2	1	2	1	5	4	5
1	1	1	5	3	2	2	165	67	2	2	1	2	3	2	1	3	2	2	2	2	1	3	2	2	1	2	3	4	5	4	4	4	4	4	4	4	4	4	4
2	2	1	2	1	1	3	178	49	2	2	2	1	1	3	1	1	2	1	2	1	3	2	2	3	2	2	2	4	4	5	3	4	4	5	4	4	4	4	4
2	2	2	2	4	2	3	178	47	4	3	5	3	3	5	4	3	3	5	5	5	3	3	3	2	1	1	1	4	4	4	3	4	5	5	5	5	4	4	4
2	2	2	3	1	1	2	181	75	4	4	3	3	3	4	3	5	4	4	4	5	5	5	2	1	1	2	2	4	5	4	4	4	4	3	5	4	5	5	5
1	1	2	4	3	2	3	176	62	3	2	1	1	1	1	3	2	1	3	2	3	2	2	1	2	2	1	2	5	5	5	5	5	5	3	4	5	2	3	1
2	2	1	4	4	1	1	166	53	3	2	2	2	2	1	1	3	2	1	2	1	3	1	2	2	1	1	3	5	5	4	4	4	4	4	4	5	5	3	4
1	1	2	4	3	2	4	169	69	5	3	4	5	3	4	5	3	3	4	3	2	3	3	4	4	4	5	4	3	1	2	3	1	1	1	3	4	2	2	1
1	2	1	4	3	1	1	180	72	2	1	3	2	2	2	2	2	3	1	2	3	1	2	3	1	2	1	2	4	5	4	4	4	4	4	4	4	4	4	4
1	1	2	3	1	1	2	181	65	5	3	5	5	4	5	3	3	4	5	4	5	5	4	5	3	5	3	2	3	3	4	5	4	5	4	5	4	2	1	2
2	1	2	4	5	2	3	158	72	1	1	1	2	1	2	1	3	3	1	1	3	2	3	2	2	1	1	2	5	4	5	3	4	4	5	5	5	3	2	3
1	2	1	4	3	1	3	171	57	2	1	2	2	3	1	2	2	3	2	1	1	2	1	5	3	5	4	3	4	4	4	3	4	5	5	5	5	4	5	4
1	2	2	3	4	2	1	166	67	3	1	2	2	3	3	3	3	2	1	3	2	2	1	1	2	1	2	1	5	4	4	3	4	5	4	3	4	5	5	4
2	1	2	5	1	2	3	160	70	3	2	1	1	1	1	3	2	1	3	2	3	2	2	1	3	2	2	1	4	5	5	5	3	5	4	4	5	3	4	5
1	2	1	5	5	2	3	175	61	5	5	3	4	4	5	5	4	3	5	3	3	3	4	2	2	2	1	3	3	5	4	5	3	5	5	4	4	3	4	4
1	1	1	4	1	2	4	174	52	2	3	2	2	2	3	2	3	2	1	2	1	1	2	1	2	2	1	3	2	3	3	1	4	1	2	3	3	4	3	1
1	2	1	1	3	2	2	173	63	1	2	1	2	2	1	2	1	3	2	3	3	2	1	2	2	2	1	3	4	3	4	4	5	5	5	3	4	5	5	4
1	1	2	3	6	2	1	168	54	4	3	5	2	4	3	3	3	4	3	4	4	5	5	4	3	4	5	5	4	3	4	4	4	3	5	4	5	2	3	1
1	2	2	5	5	2	2	177	51	2	2	2	1	2	3	1	2	3	2	2	3	3	1	2	1	2	2	3	5	3	4	3	5	5	3	3	5	5	3	4
1	1	1	1	3	2	2	168	54	5	3	2	4	3	3	4	4	3	4	4	5	3	5	2	1	2	3	1	4	5	5	3	5	3	5	5	5	4	4	4
2	1	2	4	3	2	3	170	46	2	1	1	2	2	3	1	2	2	1	2	2	3	1	4	3	5	5	3	5	4	3	4	3	3	3	4	4	4	3	5
1	1	1	4	2	2	3	178	70	3	3	5	3	3	4	3	5	3	5	5	5	5	4	2	2	1	1	1	5	3	4	5	5	4	4	4	4	5	5	4
1	2	1	2	3	2	4	166	70	2	2	1	2	3	1	2	1	2	1	1	2	3	1	2	2	2	2	3	4	3	4	4	4	3	5	4	5	4	4	4
1	2	2	5	3	1	3	180	67	2	3	1	1	1	1	3	3	1	3	3	2	2	2	2	1	3	2	3	3	2	2	2	3	3	3	2	1	4	5	5
2	2	2	4	2	1	3	166	74	3	3	3	3	5	4	3	3	2	5	4	4	3	4	5	3	5	3	5	2	1	3	3	1	2	1	1	3	3	3	4
1	2	1	2	3	2	3	176	56	2	1	3	1	2	1	2	3	2	2	2	2	1	2	1	2	2	3	3	4	4	4	5	3	5	5	3	5	4	4	5
2	2	1	2	1	2	2	165	63	3	5	5	4	3	3	5	4	5	3	4	3	5	3	5	4	5	5	4	1	3	3	3	4	3	3	1	3	1	2	1
2	2	2	2	4	2	3	173	68	3	3	2	2	2	1	1	1	3	3	2	1	1	3	2	1	1	1	3	5	5	5	4	4	4	5	5	4	5	5	4
1	1	1	4	2	1	5	177	71	2	2	1	2	2	1	1	1	1	2	2	2	3	1	1	1	2	3	3	3	4	5	4	5	5	5	5	5	3	4	4
1	2	1	2	5	2	1	163	75	2	3	2	1	1	2	2	3	1	2	2	2	2	3	2	2	2	2	2	4	4	4	3	4	3	5	5	4	5	4	4
1	1	2	5	3	1	1	159	66	1	3	1	2	2	1	2	1	3	2	2	2	1	1	3	1	1	3	2	5	3	5	4	4	4	4	3	4	4	5	4
2	1	2	5	2	2	4	163	55	3	2	2	2	2	1	1	3	2	1	2	1	3	1	1	2	3	1	1	3	5	4	4	4	5	5	3	5	4	4	4
1	2	2	4	5	1	2	178	65	3	5	5	5	3	3	4	4	5	2	3	5	5	5	5	2	5	3	4	3	1	3	3	1	3	1	3	1	2	1	3
1	1	1	1	4	2	2	175	63	4	4	5	5	4	4	5	4	5	3	5	3	5	5	1	2	2	1	1	4	4	3	5	3	5	4	3	4	3	4	4
2	2	2	5	3	2	1	157	73	3	1	2	1	3	1	3	3	3	2	2	3	3	2	1	2	1	2	1	4	4	3	4	3	3	4	5	4	5	4	4
1	2	2	5	2	2	2	163	65	4	4	5	3	5	4	2	3	4	5	4	5	5	4	4	5	4	3	3	1	2	4	1	1	2	3	2	2	3	1	1
1	1	1	4	1	2	3	172	59	2	2	2	1	2	3	1	2	3	2	2	3	3	1	1	1	1	2	2	4	5	5	5	4	3	5	3	4	4	4	4
2	2	1	1	2	2	3	160	53	2	3	3	2	2	2	1	2	2	3	2	1	1	1	3	2	1	2	3	4	4	5	5	4	4	5	3	5	4	5	4
1	2	1	1	2	1	2	173	62	5	4	5	3	3	3	4	2	5	5	4	3	4	3	4	4	5	3	4	3	4	1	1	2	2	4	3	2	2	1	1
2	2	1	1	1	2	3	178	61	1	2	1	2	2	2	1	2	3	2	1	1	1	1	1	1	3	1	1	4	5	3	5	4	3	4	3	4	4	4	4
2	1	1	3	2	1	3	159	49	2	1	3	2	2	2	2	2	1	2	2	3	2	2	3	2	1	1	1	3	5	3	5	3	4	4	4	4	4	4	4
2	1	1	1	5	1	4	159	75	2	4	4	2	4	4	5	5	5	3	3	4	4	3	3	3	4	4	5	3	4	2	1	1	3	2	1	2	1	3	2
2	1	2	4	3	2	1	162	47	1	3	2	3	1	3	3	2	1	2	2	2	2	2	1	2	1	1	2	4	5	5	5	5	5	4	4	5	5	5	4
1	2	2	2	1	2	1	158	74	2	2	3	2	1	2	2	1	1	2	2	3	3	2	1	1	1	3	2	5	5	4	4	4	3	5	4	4	3	5	5
1	1	2	2	3	2	4	160	68	1	2	1	2	2	3	2	2	1	3	2	1	1	3	1	1	1	2	2	5	5	4	5	4	4	5	3	5	5	5	5
1	2	1	4	3	1	3	172	61	2	1	1	2	1	2	2	3	3	1	3	2	1	2	2	3	2	2	2	4	4	4	3	3	5	3	4	5	3	4	5
1	2	1	2	4	1	4	163	46	4	4	3	5	5	5	5	3	5	4	5	4	4	4	2	2	2	2	1	2	2	1	3	3	1	1	2	3	4	3	5
1	1	2	3	3	2	3	182	56	2	2	1	1	3	1	1	1	1	2	2	1	3	1	3	1	2	1	1	1	1	2	1	1	2	3	4	1	2	3	4
1	2	1	2	1	2	5	180	51	1	2	1	2	2	1	2	1	3	2	3	3	2	1	2	1	1	2	2	3	4	5	4	5	5	5	3	4	4	5	4
2	1	1	3	4	2	4	182	67	3	4	4	4	5	4	4	4	5	3	3	3	5	4	4	4	3	5	5	1	2	1	2	1	3	1	1	1	3	1	2
2	2	1	4	1	2	1	165	57	1	1	2	2	2	3	1	2	2	3	2	2	1	3	5	4	4	5	3	3	3	4	5	4	5	4	5	4	3	1	2
2	2	1	1	1	2	3	169	68	1	1	1	2	1	2	1	2	2	1	2	1	1	1	1	3	2	2	2	5	4	4	4	4	4	5	4	4	4	5	4
2	1	2	4	1	1	5	158	57	1	2	1	3	1	1	2	2	2	3	2	3	2	2	2	3	3	2	3	5	4	5	5	5	4	3	3	4	4	4	5
2	1	2	1	2	2	1	164	50	3	2	2	1	1	2	1	2	2	1	2	2	1	1	3	2	2	3	3	5	4	4	3	4	5	4	3	4	1	2	3
1	2	1	3	2	2	3	158	51	3	3	4	4	3	4	5	4	5	4	5	5	5	3	5	5	5	3	4	3	2	1	1	1	2	2	2	3	2	2	1
2	1	2	5	2	2	3	176	66	2	3	2	2	1	2	2	3	2	2	1	1	3	1	1	3	1	1	2	4	5	5	5	3	5	4	4	5	5	4	4
2	2	2	2	1	2	5	168	76	2	1	2	2	3	1	3	1	3	1	2	2	1	3	1	1	1	1	3	5	4	5	5	4	5	4	3	4	3	5	4
1	2	2	3	2	1	3	169	76	1	3	1	1	2	1	1	1	1	3	2	2	1	2	2	3	3	1	1	4	3	5	5	5	5	4	4	5	5	5	5
2	2	2	1	4	1	2	174	58	1	1	2	2	1	3	1	2	2	1	2	1	2	3	4	5	5	3	3	4	5	4	4	5	5	4	5	3	5	5	5
1	1	1	5	4	1	3	159	65	2	2	1	3	1	2	3	2	2	2	1	2	3	3	3	2	2	2	2	2	2	1	1	1	3	3	1	2	4	5	5
1	2	2	1	1	2	4	157	48	2	2	1	1	3	1	1	1	1	2	2	1	3	1	3	3	4	4	3	1	2	1	3	2	2	1	2	1	2	1	2
2	2	2	2	1	1	3	178	74	1	1	2	1	2	2	1	2	2	2	3	2	2	2	2	2	2	2	3	4	3	5	3	5	4	3	4	3	5	4	4
2	1	2	1	1	2	3	165	63	3	2	2	3	2	2	1	2	1	1	1	2	1	1	3	2	1	2	3	3	4	5	4	5	5	5	3	4	5	5	5
1	1	1	1	3	1	3	158	61	2	2	2	1	1	1	2	1	2	2	2	1	2	1	1	3	3	3	2	5	3	4	3	5	4	3	5	3	2	2	3
1	2	2	1	1	1	2	173	67	5	4	4	5	5	5	3	5	3	5	3	5	5	2	3	2	3	2	2	3	3	2	2	4	2	2	1	2	5	4	4
2	1	1	1	4	1	3	179	58	4	4	5	4	5	4	3	2	4	3	5	4	3	3	2	3	2	2	2	1	3	1	3	3	3	1	1	1	1	1	2
1	2	2	1	3	2	3	176	73	5	4	4	4	4	5	5	5	5	5	5	4	3	3	3	5	5	5	3	3	2	3	2	1	2	1	3	1	2	2	1
1	2	1	4	1	2	3	157	55	1	2	3	2	1	2	2	1	1	1	3	2	2	2	3	5	3	3	5	5	4	5	4	4	4	5	3	4	4	4	4
2	2	1	4	3	2	2	158	46	3	2	2	2	2	1	2	1	2	1	2	1	3	1	2	3	4	5	4	4	5	5	5	5	5	4	4	5	4	4	5
2	2	2	1	4	1	4	182	76	5	5	3	5	5	4	4	4	5	2	4	3	4	5	4	4	5	4	5	1	2	1	2	1	1	2	1	3	5	5	4
1	1	1	5	4	1	3	173	74	2	3	2	1	3	2	1	2	2	2	2	1	2	2	3	3	1	1	1	3	1	3	1	2	4	2	1	4	5	5	5
2	2	1	2	4	2	3	167	50	1	3	3	2	1	2	3	1	2	3	2	1	1	1	2	1	1	2	2	4	5	4	4	4	4	4	4	4	4	3	4
1	2	2	3	5	2	4	173	58	5	3	5	3	2	5	4	5	3	4	4	4	3	5	2	2	2	2	3	4	4	4	4	5	5	4	4	5	4	2	1
1	1	2	3	5	1	3	168	62	2	2	2	3	1	1	2	2	2	2	2	1	2	1	2	1	2	2	3	4	4	4	4	5	5	4	4	5	5	4	4
2	2	2	3	1	2	2	172	49	2	3	2	2	2	3	2	3	2	1	2	1	1	2	1	1	1	1	1	4	5	3	5	4	4	5	5	3	4	4	5
1	2	2	4	2	1	2	170	52	3	1	2	1	3	1	3	3	3	2	2	3	3	2	4	4	3	4	5	4	5	3	5	4	3	4	3	4	4	4	4
2	1	2	2	2	1	3	179	55	2	1	1	2	1	2	3	1	2	2	2	1	1	1	4	3	3	4	4	4	5	5	3	5	3	5	5	5	4	4	5
2	2	1	5	6	1	3	167	66	3	2	2	1	2	2	2	3	2	3	1	2	2	3	2	3	2	1	2	4	4	5	3	4	5	4	5	5	4	4	3
1	2	2	4	3	2	1	169	59	1	2	1	2	2	1	2	1	3	2	3	3	2	1	1	1	2	3	1	2	3	3	3	1	2	2	3	3	4	3	3
1	2	1	3	3	2	3	168	73	1	2	2	1	1	2	2	1	2	1	1	2	1	3	1	3	2	2	1	2	1	3	1	4	2	3	3	1	4	5	3
1	2	1	1	3	1	3	159	73	2	3	5	5	3	2	4	3	4	5	5	4	5	3	4	4	5	5	5	4	3	3	3	1	1	3	4	2	3	1	2
2	2	1	4	3	2	4	160	50	4	3	5	2	4	3	3	3	4	3	4	4	5	5	3	4	4	3	5	1	3	1	1	2	1	3	2	1	2	1	1
1	2	1	4	1	2	3	167	68	2	2	3	1	2	3	1	3	1	1	2	1	1	1	3	1	1	2	3	5	4	5	4	5	5	5	5	5	4	4	5
2	2	1	4	3	1	1	169	63	1	2	2	1	2	1	3	2	3	2	2	2	3	2	2	3	2	2	2	1	1	1	2	1	3	1	3	2	4	5	4
1	2	1	5	1	2	4	159	56	4	5	3	3	3	5	4	4	3	3	3	3	4	5	3	4	3	5	3	1	2	1	3	3	2	1	2	2	2	1	1
1	2	1	2	4	2	2	170	47	2	3	1	2	2	3	2	2	2	3	3	1	3	2	3	3	2	3	1	4	5	3	5	4	4	5	5	3	4	4	4
2	1	2	3	4	1	2	165	76	3	5	5	5	3	3	4	4	5	2	3	5	5	5	4	5	3	3	3	1	3	1	3	3	1	1	1	3	3	1	3
1	1	1	4	2	2	5	173	64	2	2	1	3	1	1	2	2	2	3	2	2	2	2	2	2	2	2	2	5	4	4	5	5	4	4	5	4	5	5	3
1	1	2	5	6	1	4	178	69	5	5	5	4	4	3	4	5	5	3	4	4	4	5	4	5	3	4	4	2	1	3	3	1	4	3	2	3	2	1	1
1	2	1	2	2	2	3	171	75	2	3	3	3	1	2	1	2	2	1	2	2	2	3	3	1	1	2	1	4	3	4	5	4	4	3	4	4	5	3	4
1	2	2	3	4	2	1	180	74	1	3	1	2	2	1	2	1	3	2	2	2	1	1	1	1	1	2	2	3	5	4	5	5	4	5	4	4	3	5	3
2	1	1	2	1	2	3	180	70	2	2	1	1	3	2	1	1	3	2	1	1	1	2	1	1	2	2	3	3	4	4	3	4	5	5	5	4	3	4	4
2	1	2	3	5	1	2	162	59	3	3	4	4	3	4	5	4	5	4	5	5	5	3	3	1	1	1	3	5	3	4	4	5	4	3	3	4	5	5	5
2	1	1	4	3	2	2	177	56	2	2	2	1	1	1	2	1	2	2	3	2	2	1	2	1	2	3	1	5	3	4	3	5	4	3	5	3	3	4	3
2	2	1	5	1	2	1	179	71	4	5	4	5	3	3	5	3	5	5	5	4	4	4	4	4	4	5	4	4	3	5	4	5	4	3	4	3	4	4	5
1	1	2	2	1	2	3	176	52	2	2	2	3	2	3	2	3	1	2	3	2	2	1	1	3	2	1	3	4	3	3	4	5	3	4	3	5	5	4	5
2	2	2	2	2	2	3	158	66	2	2	2	1	3	3	1	1	2	2	1	1	2	3	3	2	1	2	2	5	5	5	4	5	5	5	5	4	4	4	4
1	1	2	1	3	1	1	158	50	2	2	2	2	2	3	3	2	1	2	2	1	2	2	1	2	2	2	1	5	5	5	5	5	5	3	4	5	4	5	5
1	1	1	5	5	1	2	182	73	5	3	4	5	4	3	4	5	4	3	3	3	5	5	3	1	2	2	1	4	5	3	4	4	5	4	5	5	1	3	3
1	2	2	4	2	1	2	167	50	2	1	2	3	3	2	1	2	2	1	1	2	1	3	1	1	2	2	2	3	4	4	3	4	4	4	5	3	4	5	4
1	2	2	5	4	2	3	165	65	2	1	2	2	2	2	3	1	3	2	2	1	2	1	1	3	2	2	2	3	5	4	3	4	4	4	4	3	4	5	4
1	1	1	1	1	1	3	164	65	2	1	2	1	1	1	1	2	1	2	2	2	2	1	2	1	3	2	2	4	4	4	3	3	5	3	4	5	4	4	4
1	2	2	3	3	1	1	175	75	3	4	2	3	3	5	5	5	4	5	4	4	3	5	4	4	3	5	3	4	3	3	1	1	1	2	2	3	5	4	4
1	2	1	2	1	2	4	176	66	2	1	2	1	3	2	1	3	2	2	1	2	2	1	2	3	1	2	1	5	4	4	4	3	4	5	4	5	5	4	5
2	1	2	4	3	1	3	172	75	3	4	2	3	4	3	5	3	5	3	4	4	5	4	3	5	4	3	4	2	3	3	3	1	2	2	3	3	1	1	2
2	2	1	1	2	1	3	174	49	2	1	2	3	3	2	1	2	2	1	1	2	1	3	1	2	3	2	3	4	4	4	4	3	4	5	5	5	3	2	3
2	1	2	4	1	2	3	162	55	1	1	2	2	2	2	2	2	2	2	1	2	3	1	2	2	1	2	3	5	3	5	4	5	4	5	4	5	4	4	4
2	2	2	2	4	2	3	167	51	2	1	2	2	3	1	2	3	1	1	2	2	1	2	2	2	2	1	1	5	5	5	5	4	5	5	3	5	3	1	1
2	1	2	1	2	1	2	181	57	2	1	1	2	2	1	2	3	3	1	2	1	2	1	2	1	1	2	2	5	4	4	4	4	4	5	4	4	5	4	4
2	1	1	2	2	2	3	166	64	2	2	2	1	2	3	1	2	3	2	2	3	3	1	3	2	3	2	2	4	4	3	5	3	5	4	3	4	5	5	5
1	2	1	4	3	2	3	173	51	2	3	3	2	2	2	1	2	2	3	2	1	1	1	5	4	4	2	5	2	2	2	1	1	3	3	1	4	1	2	2
2	1	2	4	3	1	2	174	60	2	1	2	1	2	2	1	2	1	2	1	1	3	3	1	2	1	1	3	3	4	3	4	5	4	3	5	4	4	3	5
2	1	1	4	4	2	3	160	70	2	2	2	3	2	3	2	3	1	2	3	2	2	1	1	3	2	2	2	4	5	4	5	4	3	4	3	4	5	5	4
2	2	1	1	4	2	4	169	47	1	3	2	2	1	1	2	2	1	3	1	3	2	1	5	3	3	5	3	5	5	5	4	5	5	5	5	4	3	5	5
2	2	1	2	5	1	3	169	57	2	4	4	2	4	4	5	5	5	3	3	4	4	3	2	1	1	2	2	4	3	5	5	5	5	3	5	3	5	5	4
1	2	2	5	4	2	4	179	51	1	3	1	1	2	1	1	1	1	3	2	2	1	2	3	2	1	3	1	4	5	5	3	3	5	4	5	5	4	3	5
1	1	1	3	4	1	1	172	46	5	4	5	2	2	5	3	3	4	5	4	5	4	3	2	2	1	1	1	5	3	5	4	4	4	3	4	5	3	3	4
1	1	1	5	3	2	4	158	61	2	3	2	1	2	1	2	2	3	2	3	2	2	2	2	1	2	2	2	3	4	4	5	5	5	5	3	3	4	3	5
2	2	1	4	1	2	1	164	53	2	3	2	2	1	3	2	1	1	1	1	1	1	2	2	3	2	2	2	1	2	1	3	2	2	1	2	1	4	4	5
2	2	2	4	2	2	5	158	56	1	3	1	1	2	2	1	2	2	2	2	2	2	1	3	2	2	2	2	5	5	3	4	5	4	4	3	4	5	5	5
1	2	1	2	2	2	5	166	49	1	2	2	2	1	2	2	3	1	1	2	1	1	1	3	2	1	2	2	3	4	4	4	4	4	5	5	5	3	2	3
2	1	2	4	2	2	3	162	62	4	4	2	4	3	3	3	4	4	3	4	3	4	4	3	5	3	3	3	3	3	2	1	3	3	2	3	2	1	3	2
1	1	2	3	3	2	1	159	51	5	3	5	4	4	5	3	4	3	2	4	5	3	5	3	3	1	1	1	5	4	5	3	5	5	3	3	5	4	5	4
2	2	1	5	2	1	3	176	66	1	2	2	2	2	2	2	2	3	1	2	1	1	2	3	4	5	3	3	5	5	5	4	4	4	5	5	4	3	4	3
1	2	1	4	3	1	3	159	51	2	3	1	1	1	1	3	3	1	3	3	2	2	2	4	4	3	3	3	2	1	1	2	3	3	3	2	4	3	2	1
1	1	2	1	2	1	3	181	50	1	3	1	2	1	1	1	2	2	1	3	2	3	3	3	2	1	2	2	5	5	3	5	4	3	5	5	5	4	4	5
2	1	2	4	1	1	4	182	60	2	1	1	3	2	1	2	1	2	1	3	1	2	1	2	2	1	2	3	5	4	5	5	4	4	3	5	4	4	4	4
2	1	1	1	4	2	4	172	62	2	2	2	1	3	1	1	3	3	3	3	2	2	1	3	4	3	3	3	2	3	2	3	1	1	1	2	1	2	3	3
1	1	2	5	3	1	1	177	53	3	5	5	5	5	4	5	5	3	4	4	4	2	3	3	5	3	4	5	3	4	3	4	4	5	5	5	3	4	1	1
1	1	1	1	1	2	4	160	50	2	2	1	1	3	1	3	1	2	1	2	3	3	3	2	1	2	1	2	3	4	5	4	5	4	5	5	4	3	1	3
2	2	2	1	4	2	2	170	58	2	2	3	3	1	3	3	2	3	2	2	2	2	2	2	2	3	2	1	2	3	1	1	2	3	3	3	1	4	3	5
1	2	2	1	2	2	1	177	56	2	2	1	1	3	1	3	1	2	1	2	3	3	3	2	2	1	2	3	3	4	5	4	5	4	5	5	4	5	5	4
2	1	1	1	1	1	3	181	57	2	3	2	2	1	2	2	3	2	2	1	1	3	1	1	3	2	2	1	4	3	3	4	5	3	4	3	5	5	4	4
1	2	1	1	3	2	3	180	56	4	3	4	3	4	3	3	5	3	5	3	5	5	5	1	3	1	3	1	4	4	3	4	3	3	4	5	4	2	1	1
2	1	1	2	2	1	4	181	59	2	3	1	2	3	1	1	2	1	2	2	1	3	3	2	3	1	2	2	4	5	4	5	5	5	3	4	5	2	1	2
2	2	2	2	3	1	4	180	66	2	1	2	1	2	2	1	2	1	2	1	1	3	3	1	1	2	1	2	3	4	5	4	4	4	4	3	4	3	4	3
1	1	1	1	1	2	2	180	71	2	3	3	2	2	2	2	2	2	3	3	3	3	1	2	3	2	2	1	3	4	4	4	4	4	5	5	5	3	4	3
2	2	2	3	1	2	3	182	71	2	2	1	2	3	1	2	1	2	1	1	2	3	1	3	1	2	2	1	3	4	4	3	4	5	3	5	5	4	3	4
1	2	1	4	4	2	3	165	71	3	5	5	4	3	5	4	5	3	3	3	3	5	5	3	1	1	2	3	5	3	4	4	4	5	5	3	3	4	4	5
2	2	2	4	2	1	3	181	55	2	1	1	2	2	1	2	1	2	3	1	3	3	2	2	3	1	2	1	4	2	2	3	3	1	1	2	3	5	3	4
1	2	1	5	1	2	3	166	70	2	1	1	2	2	3	1	2	2	1	2	2	3	1	1	2	2	2	2	5	4	5	4	4	5	4	4	4	4	4	5
1	2	2	1	2	1	4	160	61	2	1	2	1	3	1	1	1	3	1	3	1	2	3	2	2	2	2	3	4	3	5	4	5	4	3	4	3	4	3	4
1	1	1	2	2	2	3	158	53	1	1	1	2	1	1	3	2	3	1	1	1	2	2	1	2	3	2	3	2	1	3	2	1	2	1	1	2	3	4	5
1	2	1	2	1	2	2	178	48	2	2	2	3	2	2	1	2	2	1	1	3	2	2	3	5	4	5	5	4	3	5	4	4	4	4	4	5	4	5	3
2	1	2	5	3	1	2	160	49	2	2	2	1	1	3	1	1	2	1	2	1	3	2	2	2	2	2	1	3	4	4	3	4	5	5	5	4	4	4	3
1	2	1	4	3	2	2	181	68	4	3	4	3	4	3	3	5	3	5	3	5	5	5	1	2	1	2	2	2	1	1	1	1	2	3	3	1	1	1	1
2	2	2	5	2	2	3	177	65	1	2	1	2	2	2	1	2	3	2	1	1	1	1	2	1	2	1	3	4	5	4	5	4	5	4	4	4	5	3	5
2	1	2	5	4	1	3	157	59	2	3	2	3	2	2	1	1	2	1	2	2	2	1	1	1	1	2	2	2	2	3	1	1	2	2	1	3	3	4	2
2	2	2	2	1	1	2	177	59	3	5	2	5	4	4	4	5	3	5	4	5	5	5	4	3	5	5	5	4	3	4	3	5	4	4	5	4	3	4	3
2	1	2	1	1	1	5	172	57	3	3	1	2	1	2	1	1	1	1	2	2	1	3	3	2	1	2	3	4	3	5	4	3	4	4	3	4	3	4	4
2	2	2	5	5	1	1	182	52	1	2	3	2	3	3	3	2	1	1	3	2	1	1	3	2	2	2	1	4	5	5	5	5	5	5	4	4	5	4	4
1	1	1	1	3	2	1	178	74	2	2	1	3	1	1	2	2	2	2	2	2	2	1	2	2	1	2	2	4	5	4	3	3	5	3	5	5	3	4	5
2	2	1	4	1	2	2	169	48	2	2	1	2	3	1	2	1	2	1	2	2	1	2	2	1	2	2	3	4	5	4	4	4	4	4	4	4	3	5	4
2	2	1	4	1	2	1	175	69	2	1	1	2	1	3	1	3	2	2	2	2	2	2	1	1	2	2	1	5	5	5	4	3	5	3	5	5	4	3	4
2	2	1	4	4	2	2	162	50	2	5	5	2	3	3	4	3	5	4	3	4	4	5	2	2	2	1	2	4	4	4	4	3	5	3	4	3	5	5	4
1	2	1	2	5	1	2	171	63	3	5	5	4	5	5	3	5	4	3	5	5	5	5	3	3	5	4	4	5	4	5	4	4	5	4	4	4	3	1	2
1	1	1	2	1	2	4	171	73	1	1	1	2	1	2	1	3	3	1	1	3	2	3	1	2	3	2	2	3	3	3	3	1	1	3	2	1	5	3	4
2	2	1	4	1	2	3	175	58	1	1	1	2	1	2	1	3	2	2	3	3	1	2	3	2	1	2	2	4	5	3	5	4	4	5	5	4	5	5	5
1	1	2	4	1	2	3	162	71	1	2	3	1	2	2	2	1	3	2	1	1	3	3	4	2	5	3	5	4	5	4	5	3	4	5	5	4	5	4	4
2	1	1	1	2	1	5	172	73	2	3	2	1	2	1	2	2	3	2	3	2	2	2	2	1	2	3	3	4	4	5	5	4	5	4	4	5	5	5	4
2	1	2	3	4	1	1	175	55	1	1	2	1	1	1	1	2	2	1	2	3	3	2	2	2	2	1	1	2	2	3	2	1	3	1	2	2	3	4	3
1	1	2	3	1	2	2	163	47	1	2	2	2	2	2	2	2	1	1	2	2	1	1	1	1	2	2	1	4	5	5	3	4	4	4	4	4	4	5	5
1	2	1	4	5	2	1	174	56	1	2	2	2	1	2	2	3	1	1	2	1	1	1	2	3	2	3	3	4	3	4	5	5	5	4	5	4	3	4	4
2	2	1	2	3	1	2	182	49	1	3	2	2	1	1	3	3	1	2	1	2	1	3	3	1	1	2	2	5	5	4	5	4	5	4	5	4	5	4	5
1	2	2	4	5	2	1	169	69	3	2	1	2	1	1	2	3	2	2	1	1	2	1	4	3	5	5	2	3	4	5	4	5	5	5	3	4	4	4	4
1	1	1	1	4	1	4	181	59	1	1	1	2	1	2	1	3	3	1	1	3	2	3	2	3	2	2	2	5	4	5	5	4	5	4	3	4	3	4	4
1	2	1	5	2	2	3	164	68	2	1	2	2	2	1	3	3	2	2	2	1	2	2	1	2	2	1	1	3	5	4	5	3	5	5	4	4	5	5	4
1	1	1	1	5	1	1	161	63	4	2	5	4	4	4	3	2	3	5	5	3	2	4	4	5	4	3	5	3	3	3	1	3	2	2	1	3	2	1	2
2	2	2	2	2	2	5	168	63	2	4	3	4	3	3	4	4	3	2	3	2	5	5	1	3	1	2	2	3	4	3	4	5	4	3	5	4	4	4	5
1	2	1	2	1	1	3	167	70	2	1	1	2	1	2	1	2	1	2	1	2	2	2	1	2	2	2	2	4	3	4	4	5	5	4	3	5	4	3	4
1	2	2	4	3	2	3	177	75	2	3	1	2	1	2	1	2	2	2	1	1	1	2	3	2	2	3	2	3	4	5	4	5	4	4	5	5	4	4	5
2	2	2	2	5	2	1	163	59	2	1	2	2	2	1	1	2	2	2	2	2	2	2	3	1	1	2	1	4	3	3	5	4	4	4	4	4	5	3	5
2	1	2	5	1	1	3	163	60	3	2	2	1	1	2	3	2	2	3	3	2	1	2	1	2	3	1	1	5	3	4	3	5	4	3	5	3	4	3	3
2	2	2	2	4	1	3	168	70	5	5	3	5	3	3	4	3	4	5	5	3	4	4	3	5	3	4	4	3	3	3	3	2	3	2	2	1	1	3	2
2	2	2	2	2	2	4	161	70	2	1	3	1	2	3	1	2	2	2	2	3	2	1	2	2	2	1	3	4	5	4	5	4	5	4	4	4	3	1	3
1	2	2	5	4	2	3	175	66	3	2	2	2	2	1	2	1	2	1	2	1	3	1	1	2	1	3	1	4	3	5	4	5	4	3	5	3	3	4	4
2	2	2	2	2	1	1	164	52	2	2	1	1	1	2	1	1	1	1	2	3	1	3	2	1	3	2	3	3	3	4	5	4	5	4	5	4	4	5	4
1	2	1	3	4	1	3	175	61	2	1	2	1	3	2	3	3	1	1	3	2	1	2	1	2	3	3	2	4	3	4	3	5	4	3	4	3	5	3	4
2	1	1	4	3	2	3	172	47	2	2	2	2	1	2	2	1	3	1	2	2	3	2	2	3	1	3	2	4	4	3	5	4	5	4	5	4	1	3	3
2	2	2	1	2	1	3	172	47	2	2	2	3	1	3	1	2	2	1	1	2	2	2	3	3	2	2	2	5	5	5	5	4	5	5	3	5	5	5	4
2	2	2	4	1	2	2	181	65	5	5	5	5	5	3	5	5	4	4	4	3	4	4	4	3	3	4	3	1	4	3	1	2	1	3	1	1	3	1	1
1	1	1	5	1	2	3	167	56	3	4	5	2	5	4	3	4	4	5	4	4	5	3	2	2	2	1	1	4	5	3	5	5	4	4	5	4	4	4	5
1	2	2	3	1	2	2	173	69	2	2	1	3	3	2	2	2	1	2	2	2	1	2	2	2	2	1	2	1	2	3	4	1	2	3	3	2	5	3	4
2	1	2	1	1	2	2	158	76	2	2	2	3	2	2	1	3	1	1	2	2	2	2	2	1	2	2	1	4	3	4	5	4	4	3	5	4	4	5	3
2	1	1	4	1	2	5	172	47	2	3	3	3	5	4	4	4	4	3	4	3	4	4	1	3	2	2	2	4	5	3	5	4	3	4	3	4	5	4	5
2	2	2	5	1	1	4	170	49	3	3	5	4	5	4	4	4	2	5	5	3	2	5	3	4	4	2	5	1	3	2	2	2	1	1	4	1	2	2	1
2	2	1	4	5	2	1	176	55	2	1	1	3	3	3	3	1	3	1	3	1	2	2	2	1	2	3	1	4	5	5	5	3	5	4	4	5	5	5	4
1	2	1	3	1	2	3	171	75	5	5	5	4	3	4	3	4	3	4	4	3	5	5	2	3	1	2	1	4	4	4	5	3	4	4	4	5	5	5	4
1	1	1	5	1	1	2	164	72	2	2	2	1	2	1	2	2	1	1	2	2	2	3	3	3	5	3	4	5	4	5	5	4	4	3	5	4	4	4	4
1	1	2	1	4	2	3	163	62	2	2	1	1	3	1	1	1	1	2	2	1	3	1	1	3	2	2	1	3	4	5	4	4	4	4	3	4	4	5	4
1	2	2	5	3	1	1	173	70	4	5	4	3	5	4	3	3	5	3	5	3	4	3	4	4	3	5	3	2	2	1	1	1	3	3	1	2	4	5	5
2	2	2	1	4	2	4	161	60	2	2	1	3	1	1	2	2	2	3	2	2	2	2	1	2	2	3	3	4	5	4	4	4	4	5	3	5	4	4	4
1	2	1	4	1	1	3	162	52	2	2	1	1	1	2	1	1	1	1	2	3	1	3	2	2	2	1	1	4	3	4	5	4	4	3	5	4	4	4	4
1	2	2	5	4	2	2	170	66	5	4	5	3	3	3	4	2	5	5	4	3	4	3	3	2	5	3	5	1	3	3	3	4	3	3	1	3	3	1	1
2	2	1	2	2	2	3	172	64	5	4	5	3	3	3	4	2	5	5	4	3	4	3	2	1	1	2	3	4	3	4	5	4	4	3	5	4	3	4	5
1	1	1	1	3	1	2	169	71	3	1	1	1	2	3	1	1	1	1	1	2	2	2	2	2	2	2	2	2	2	2	1	1	3	3	1	4	4	4	5
2	2	1	3	3	2	2	168	68	3	3	3	3	3	5	3	5	5	3	4	5	4	4	3	3	4	4	4	2	3	2	2	3	1	1	3	1	4	5	5
2	2	1	2	4	2	3	159	74	1	3	1	1	2	2	1	2	2	2	2	2	2	1	1	1	1	2	2	5	3	5	4	4	4	5	4	5	5	4	4
2	1	2	4	5	2	3	169	70	2	1	3	1	3	2	1	1	1	1	2	2	2	2	1	2	1	3	1	4	5	4	4	5	3	5	4	3	5	4	5
2	2	1	4	3	2	2	163	47	2	1	2	2	3	1	2	3	1	1	2	2	1	2	3	1	2	2	1	5	3	4	3	5	5	3	3	5	4	4	4
1	2	1	5	3	2	3	162	58	2	2	2	1	1	1	2	1	2	2	3	2	2	1	3	3	2	2	1	4	5	5	4	4	3	4	5	3	4	3	4
2	2	2	1	1	2	2	170	51	3	3	1	2	1	2	1	1	1	1	2	2	1	3	1	2	1	2	2	4	5	5	4	4	5	5	4	4	1	1	1
2	1	1	5	1	1	3	178	65	1	2	3	2	1	2	2	1	1	1	3	2	2	2	2	1	2	2	1	5	5	5	5	4	5	4	4	4	3	3	5
2	2	1	4	2	2	1	178	63	1	1	3	3	3	2	3	2	1	2	1	2	2	2	2	1	2	2	2	1	3	1	3	2	2	2	1	1	4	5	4
1	2	1	5	1	1	3	169	74	2	2	3	3	1	3	3	2	3	2	2	2	2	2	3	1	1	1	3	1	2	3	4	1	2	3	3	2	4	5	5
2	2	1	2	2	1	1	181	63	2	1	2	2	3	2	2	1	1	3	2	1	2	1	3	2	1	2	2	2	4	2	3	3	1	1	4	1	3	2	1
1	2	1	4	1	1	3	175	64	2	1	3	2	1	1	2	1	2	1	3	1	1	1	2	3	1	2	1	3	4	3	1	1	1	2	1	1	5	5	3
2	1	1	5	3	2	3	165	67	1	2	2	2	2	2	2	2	3	1	2	1	1	2	5	5	5	5	4	5	4	4	4	4	4	4	3	4	4	4	4
1	2	2	4	3	2	2	178	52	5	4	5	5	5	5	3	3	4	3	4	3	5	4	4	2	5	4	4	1	2	3	1	1	3	3	1	1	1	2	3
2	2	2	3	1	2	3	169	46	2	2	1	1	1	2	1	1	1	1	2	3	1	3	2	2	3	2	2	4	3	4	4	4	3	5	4	5	4	4	4
1	2	2	4	1	2	3	160	52	1	3	2	3	1	3	3	2	1	2	2	2	2	2	1	2	1	2	1	3	4	5	4	4	5	5	5	5	4	4	5
2	2	1	4	3	2	2	159	55	2	2	1	3	1	1	2	2	2	2	2	2	2	1	1	2	3	3	1	5	4	5	5	4	5	4	3	4	4	5	5
1	2	2	4	1	2	3	172	67	2	2	1	1	3	3	2	1	1	2	2	2	2	3	5	4	4	5	4	4	5	3	5	5	4	4	5	4	5	5	5
2	2	2	2	4	1	2	171	74	5	3	3	2	3	4	4	4	4	4	5	5	5	5	3	4	3	4	5	2	1	2	3	1	3	2	3	2	1	1	2
1	2	2	5	2	1	2	176	68	2	2	1	1	1	2	1	3	1	2	1	2	2	2	2	1	1	1	3	4	5	4	5	4	3	4	3	4	5	5	3
2	2	2	5	4	1	1	170	58	2	2	2	1	1	2	1	1	2	1	1	1	2	1	2	2	3	3	2	3	4	4	4	5	5	4	5	4	3	1	2
2	2	1	1	1	2	1	157	69	2	2	1	3	1	1	3	3	1	1	1	1	1	2	1	2	3	3	2	3	3	3	3	2	2	2	3	3	4	3	4
1	2	1	5	1	2	3	163	59	3	1	2	1	3	1	3	3	3	2	2	3	3	2	3	1	2	1	2	4	4	4	4	4	4	4	5	4	4	5	5
2	2	1	3	1	2	1	168	71	2	1	3	2	1	3	1	1	1	2	1	1	3	1	4	5	4	3	3	1	2	3	4	1	2	3	3	2	2	2	2
1	1	2	3	2	2	3	166	72	5	5	5	3	3	2	4	5	5	3	4	4	5	3	4	4	5	5	4	4	3	4	4	4	3	5	4	5	5	5	4
1	1	2	4	4	1	2	181	51	5	5	5	5	5	4	4	5	4	4	3	4	3	4	3	3	4	4	5	2	2	3	1	1	2	2	1	3	4	5	4
2	1	1	1	1	2	5	182	68	2	1	3	2	1	3	1	1	1	2	1	1	3	1	1	2	3	1	3	3	4	5	3	5	4	3	4	4	5	4	5
1	1	2	1	4	2	2	176	56	3	1	2	1	3	1	3	3	3	2	2	3	3	2	3	3	2	2	2	4	3	4	5	3	5	5	4	5	4	5	3
1	2	1	3	2	2	3	171	70	4	4	4	4	5	2	4	5	4	4	3	4	4	5	3	1	2	2	1	5	4	5	4	4	4	4	4	3	4	5	3
2	1	2	2	1	2	3	182	76	2	2	1	2	3	2	3	2	1	1	2	2	2	3	1	1	2	1	2	5	4	4	4	4	3	5	5	5	3	4	4
1	1	2	3	1	1	4	179	52	2	2	2	1	2	3	3	1	1	3	2	2	1	2	3	2	2	2	1	3	3	1	2	3	1	3	3	3	5	4	4
2	2	1	1	1	2	3	176	65	2	2	2	2	3	2	2	2	3	2	3	2	2	2	3	2	1	2	3	5	4	5	4	4	4	5	3	4	5	5	4
1	1	2	5	3	2	4	181	58	1	1	2	1	2	2	1	2	2	2	3	2	2	2	2	1	1	1	1	4	4	3	5	3	5	4	3	4	2	1	2
1	2	1	4	1	2	4	180	58	5	5	4	5	5	5	5	3	3	4	4	4	4	5	3	3	4	3	5	5	5	5	5	5	5	3	4	5	4	4	4
2	2	2	1	2	2	1	177	52	1	3	2	3	2	1	1	2	2	1	1	2	1	2	2	1	3	2	2	4	4	3	5	3	4	3	4	4	5	3	4
1	2	2	2	3	2	2	161	52	1	1	2	1	1	1	1	2	2	1	2	3	3	2	1	2	2	2	2	4	4	4	3	3	5	3	4	5	4	5	5
1	2	2	4	3	1	5	182	64	1	3	2	3	2	2	2	2	2	1	1	1	2	2	2	2	1	1	3	4	3	5	4	3	4	4	3	4	4	4	4
1	2	2	1	2	2	1	180	66	1	2	2	2	2	2	2	2	3	1	2	1	1	2	3	2	2	2	2	5	4	4	3	4	5	4	3	4	1	2	3
1	2	1	1	6	2	3	167	74	3	1	3	2	2	1	2	1	3	3	3	2	2	2	2	1	1	2	3	5	5	3	5	5	4	4	3	3	4	3	1
1	1	1	4	2	2	1	168	61	1	1	2	2	1	2	2	1	1	1	2	3	1	3	3	2	2	3	2	5	4	4	4	4	4	4	3	4	4	5	5
1	2	1	4	4	1	5	177	75	2	1	2	2	3	1	3	1	3	1	2	2	1	3	1	1	1	1	3	5	4	4	5	4	5	5	4	4	1	3	1
2	1	2	5	4	1	3	165	55	3	2	1	2	2	1	1	1	1	3	1	1	2	1	2	2	1	1	3	5	4	4	4	4	4	5	4	4	3	3	4
1	1	2	2	1	2	5	181	73	5	5	5	4	3	3	4	2	5	5	3	3	2	5	4	4	3	5	4	5	4	5	5	4	4	3	5	4	5	3	5
1	2	2	1	2	2	1	177	73	2	1	2	1	3	1	1	1	3	1	3	1	2	3	1	2	3	2	2	5	4	4	5	4	4	5	5	5	4	4	4
2	2	1	2	3	2	1	180	46	3	1	2	1	3	1	3	3	3	2	2	3	3	2	2	2	2	1	2	5	5	5	5	4	5	5	3	5	4	3	5
2	2	1	4	2	2	2	167	60	2	3	1	2	2	3	2	2	2	3	3	1	3	2	3	3	5	5	5	4	5	5	3	4	4	5	5	4	1	2	1
1	2	2	3	3	2	4	176	67	2	1	2	2	2	1	2	2	3	3	2	2	1	2	2	2	2	1	2	5	3	4	4	5	4	4	5	3	1	2	3
2	1	1	1	1	1	1	182	69	1	1	2	3	3	3	2	2	2	1	2	1	1	3	2	1	3	2	2	5	4	3	3	5	5	4	5	5	3	4	5
2	1	1	4	2	2	2	166	65	2	1	3	1	3	2	1	1	1	1	2	2	2	2	3	4	5	4	3	5	5	3	4	5	4	4	3	4	5	5	5
2	2	1	1	3	2	2	162	48	2	2	1	2	3	2	2	2	1	1	1	1	1	2	3	3	2	2	1	5	4	4	4	5	4	5	5	3	3	4	5
2	2	2	3	3	2	2	159	49	2	1	2	1	2	2	1	2	1	2	1	1	3	3	2	1	3	1	3	4	3	4	4	5	5	5	3	4	4	5	4
1	1	1	4	4	1	2	175	53	2	2	2	2	1	2	2	1	1	2	2	2	1	1	1	2	1	2	3	4	3	4	4	4	3	5	4	5	5	4	4
1	1	2	5	1	1	4	163	62	2	3	3	2	2	2	2	2	2	3	3	3	3	1	3	1	2	1	1	4	4	4	3	3	5	3	4	5	4	5	4
2	2	2	3	3	1	3	158	63	1	1	2	1	3	2	2	1	1	3	1	2	2	1	3	2	1	2	3	5	4	3	4	4	4	4	5	5	5	4	5
1	2	1	2	3	1	1	180	51	3	5	3	3	2	3	5	4	4	5	3	3	5	3	4	4	3	5	3	5	5	5	5	5	5	3	4	5	4	4	4
1	1	1	1	1	1	1	172	76	2	1	2	2	2	1	1	2	2	2	2	2	2	2	2	2	2	1	2	3	5	3	5	3	4	4	4	4	4	5	5
2	1	2	3	4	2	3	165	60	1	3	1	1	2	2	1	2	2	2	2	2	2	1	3	1	1	1	3	5	4	5	4	5	5	5	5	5	4	5	5
1	2	2	5	1	1	2	166	55	3	2	2	3	1	3	2	1	2	2	2	3	2	3	5	5	4	2	5	3	2	1	1	3	2	1	3	3	2	1	3
2	2	1	2	1	1	1	182	66	2	1	3	1	2	2	2	1	2	1	2	1	2	1	2	2	2	1	3	3	4	5	5	3	4	3	5	4	4	4	5
1	2	2	5	2	1	1	178	62	3	3	5	4	5	4	4	4	2	5	5	3	2	5	5	5	3	3	3	3	3	2	1	3	1	3	4	1	1	1	3
1	1	2	2	2	2	3	175	51	2	1	1	3	3	3	3	1	3	1	3	1	2	2	1	1	1	3	2	5	4	4	4	4	3	4	4	4	4	5	3
1	2	1	1	2	2	2	162	58	2	3	3	2	2	2	1	2	2	3	2	1	1	1	2	1	2	3	1	3	4	4	4	5	5	4	5	4	4	4	4
2	2	2	2	4	2	3	157	66	3	4	3	3	4	4	4	4	2	5	5	3	4	3	4	4	4	5	4	2	3	2	1	3	3	1	1	2	2	2	2
2	2	2	4	1	1	1	169	58	2	3	1	2	3	1	1	2	1	2	2	1	3	3	2	2	2	1	3	4	5	4	4	4	4	5	3	5	4	5	3
1	2	2	2	3	2	3	179	59	2	3	3	2	2	2	2	2	2	3	3	3	3	1	4	3	5	5	2	5	4	4	4	5	4	4	4	4	4	3	4
2	2	2	4	1	1	3	160	76	2	2	1	3	1	1	3	3	1	1	1	1	1	2	2	2	2	2	3	4	4	3	3	5	4	3	4	4	5	5	3
2	2	1	2	3	2	3	160	49	2	3	3	2	1	1	1	1	1	2	3	2	1	1	1	3	1	3	2	5	4	4	5	4	5	5	4	4	3	1	1
2	2	2	1	3	1	2	175	69	2	1	2	2	3	1	1	1	1	3	1	2	2	1	2	2	1	2	3	4	4	4	4	5	4	4	4	4	5	4	5
2	1	2	4	4	2	3	166	59	5	3	2	4	4	3	3	3	3	3	4	4	3	3	3	3	4	5	2	3	2	2	1	2	2	2	1	1	3	5	3
2	2	1	3	1	2	2	163	50	2	2	2	3	2	2	1	3	1	1	2	2	2	2	1	1	2	1	2	5	3	4	3	5	5	3	3	5	4	4	5
2	2	1	5	3	2	5	178	57	4	4	4	5	4	5	4	5	4	4	2	3	4	3	5	4	4	5	3	1	2	2	1	1	2	2	3	1	3	2	3
1	2	1	4	2	2	1	164	61	3	2	3	3	2	2	1	2	3	1	2	3	3	2	1	2	3	1	3	5	5	4	5	4	5	4	5	4	4	4	4
2	2	1	5	4	1	2	174	56	2	1	1	2	2	1	2	3	3	1	2	1	2	1	2	2	3	3	2	5	4	4	4	4	5	4	5	4	5	5	3
2	2	1	5	1	2	3	173	58	1	1	2	3	3	1	1	1	1	1	2	1	1	1	2	2	1	2	3	4	5	3	5	4	3	4	3	4	4	4	3
1	1	2	1	1	2	1	168	63	1	1	1	1	2	2	1	3	2	2	1	2	1	1	1	3	1	1	2	4	3	4	3	5	4	4	5	4	5	5	4
1	1	2	2	4	1	4	170	50	2	2	1	2	3	1	2	1	2	1	1	2	3	1	1	3	1	1	2	3	3	4	5	4	4	5	3	5	5	3	4
1	2	1	2	4	2	3	167	63	3	4	3	4	3	3	5	5	4	3	3	3	2	3	2	1	1	2	3	5	4	5	4	3	4	5	3	4	4	3	4
1	2	1	2	6	2	1	169	72	1	3	2	3	1	3	3	2	1	2	2	2	2	2	2	1	3	2	3	5	4	4	5	4	4	4	4	5	4	4	4
2	2	1	3	4	1	3	178	69	3	3	1	2	1	2	1	1	1	1	2	2	1	3	1	2	3	1	3	1	2	3	1	1	3	3	1	1	4	4	5
2	2	1	4	2	2	3	157	48	1	2	2	2	1	2	2	3	1	1	2	1	1	1	4	4	2	2	5	3	3	5	3	5	3	4	5	4	4	5	5
2	2	2	1	6	1	4	167	70	3	3	5	4	5	4	4	4	2	5	5	3	2	5	1	1	3	1	1	3	5	5	4	4	4	4	5	4	4	4	5
2	1	1	5	3	2	3	163	71	2	2	2	1	3	1	1	2	2	1	1	2	2	2	2	1	2	2	1	3	4	4	5	3	5	3	4	3	5	4	4
2	2	1	2	2	1	1	159	53	5	5	5	5	5	3	5	4	5	4	5	3	4	4	4	4	4	4	4	4	3	1	2	2	3	2	3	2	4	4	5
1	2	2	2	1	1	1	177	66	4	5	4	3	4	5	4	4	4	4	5	5	2	3	3	3	4	4	5	5	5	5	4	4	3	4	3	5	3	2	1
1	2	1	5	3	1	3	182	46	2	2	2	2	3	2	2	2	2	3	1	2	2	2	2	3	1	2	1	4	5	3	5	5	4	4	5	4	3	4	5
1	2	2	5	4	2	2	159	75	3	2	2	1	1	2	3	2	2	3	3	2	1	2	1	1	1	2	2	3	5	3	5	3	4	4	4	4	5	4	5
2	2	1	4	4	2	3	161	52	2	2	1	3	1	2	2	2	2	2	2	2	1	2	2	2	1	1	1	3	4	4	5	5	5	5	3	3	1	2	3
1	2	2	4	4	1	1	157	54	3	4	2	3	3	5	5	5	4	5	4	4	3	5	4	5	4	4	4	4	3	5	4	5	4	3	4	3	1	1	3
1	2	2	4	4	1	1	162	61	3	5	5	4	5	5	3	5	4	3	5	5	5	5	2	2	2	2	2	3	4	3	2	2	2	1	3	3	4	4	5
1	1	1	5	3	2	2	180	55	2	1	2	1	3	2	3	3	1	1	3	2	1	2	1	3	1	3	2	4	5	3	5	5	4	3	5	4	1	3	1
1	1	1	1	3	2	3	182	72	2	1	1	2	1	2	1	2	1	2	1	2	2	2	2	3	2	1	2	5	4	5	5	5	4	5	3	5	5	5	4
1	1	2	4	3	2	4	170	76	2	2	1	2	2	1	2	2	1	3	2	1	2	1	3	1	1	3	2	4	4	3	4	5	4	5	5	4	4	4	3
1	2	1	3	1	1	3	160	55	1	3	3	2	1	2	3	1	2	3	2	1	1	1	3	2	2	2	3	4	4	5	4	3	4	3	4	4	5	5	3
